1 **Emergence and Persistent Dominance of Omicron BA.2.3.7 Variant in**  
2 **Community Outbreaks in Taiwan**

3  
4 Pei-Lan Shao<sup>1,2\*</sup>, Hsiao-Chen Tu<sup>3\*</sup>, Yu-Nong Gong<sup>4,5,6\*</sup>, Hung-Yu Shu<sup>7</sup>, Ralph  
5 Kirby<sup>8</sup>, Li-Yun Hsu<sup>1</sup>, Hui-Yee Yeo<sup>1</sup>, Han-Yueh Kuo<sup>9</sup>, Yi-Chia Huang<sup>9</sup>, Yung-Feng  
6 Lin<sup>3</sup>, Hui-Ying Weng<sup>10,11</sup>, Yueh-Lin Wu<sup>12,13,14,15</sup>, Chien-Chih Chen<sup>16</sup>, Tzen-Wen  
7 Chen<sup>12</sup>, Kuo-Ming Lee<sup>4,6,17</sup>, Chung-Guei Huang<sup>5,18</sup>, Shin-Ru Shih<sup>4,5,18,19</sup>, Wei J  
8 Chen<sup>20,21</sup>, Chen-Chi Wu<sup>1</sup>, Chong-Jen Yu<sup>9#</sup>, Shih-Feng Tsai<sup>3,8#</sup>

9  
10 <sup>1</sup>Department of Laboratory Medicine, National Taiwan University Hospital Hsin-Chu  
11 Branch

12 <sup>2</sup>Department of Pediatrics, National Taiwan University Hospital Hsin-Chu Branch

13 <sup>3</sup>Institute of Molecular and Genomic Medicine, National Health Research Institutes,  
14 Miaoli, Taiwan

15 <sup>4</sup>Research Center for Emerging Viral Infections, College of Medicine, Chang Gung  
16 University, Taoyuan, Taiwan

- 17 <sup>5</sup>Department of Laboratory Medicine, Linkou Chang Gung Memorial Hospital,  
18 Taoyuan, Taiwan
- 19 <sup>6</sup>International Master Degree Program for Molecular Medicine in Emerging Viral  
20 Infections, College of Medicine, Chang Gung University, Taoyuan, Taiwan
- 21 <sup>7</sup>Department of Bioscience Technology, Chang Jung Christian University, Tainan,  
22 Taiwan
- 23 <sup>8</sup>National Yang Ming Chiao Tung University, Taipei, Taiwan
- 24 <sup>9</sup>Department of Internal Medicine, National Taiwan University Hospital Hsin-Chu  
25 Branch
- 26 <sup>10</sup>Biomedical Industry Ph.D. Program, National Yang-Ming University, Taipei,  
27 Taiwan.
- 28 <sup>11</sup>Biomedical Industry Ph.D. Program, National Yang Ming Chiao Tung University
- 29 <sup>12</sup>Division of Nephrology, Department of Internal Medicine, Wei-Gong Memorial  
30 Hospital, Miaoli, Taiwan
- 31 <sup>13</sup>Institute of Molecular and Genomic Medicine, College of Medicine, National Health  
32 Research Institutes, Miaoli, Taiwan

33 <sup>14</sup>TMU Research Center of Urology and Kidney, Taipei Medical University, Taipei,  
34 Taiwan

35 <sup>15</sup>Division of Nephrology, Department of Internal Medicine, Taipei Medical  
36 University Hospital, Taipei, Taiwan

37 <sup>16</sup>Department of Laboratory Medicine, Wei-Gong Memorial Hospital, Miaoli, Taiwan

38 <sup>17</sup>Division of Infectious Disease, Department of Pediatrics, Linkou Chang Gung  
39 Memorial Hospital, Taoyuan, Taiwan

40 <sup>18</sup>Department of Medical Biotechnology and Laboratory Science, College of  
41 Medicine, Chang Gung University, Taoyuan, Taiwan

42 <sup>19</sup>Research Center for Chinese Herbal Medicine, Research Center for Food and  
43 Cosmetic Safety, Graduate Institute of Health Industry Technology, College of  
44 Human Ecology, Chang Gung University of Science and Technology, Taoyuan,  
45 Taiwan

46 <sup>20</sup>Center for Neuropsychiatric Research, National Health Research Institutes, Miaoli,  
47 Taiwan

48 <sup>21</sup>Institute of Epidemiology and Preventive Medicine, College of Public Health,  
49 National Taiwan University, Taipei, Taiwan

50 \* These authors contributed equally

51 # Corresponding authors, contact information:

52 mail address: 35 Keyan Road, Zhunan, Miaoli County 35053, Taiwan

53 phone : 886-37-206166 # 35310

54 E-mail : petsai@nhri.org.tw

55

56 **word counts for abstract and text.**

57 **Abstract: 150 words**

58 **Main Text: 3073 words**

59 **Article Summary Line:**

60 **In Taiwan, Omicron BA.2.3.7 Variant has emerged and persisted in dominance**

61 **as a cause of community outbreaks**

62 **Running Title: Prevalent SARS-CoV-2 Variant of Asia**

63 **Keywords: SARS-CoV-2, Omicron variant, NGS**

64

65 **ABSTRACT**

66 Using high-throughput sequencing of the SARS-CoV-2 genome, we have analyzed  
67 2405 PCR-positive swab samples from 2339 individuals and identified the Omicron  
68 BA.2.3.7 variant as a major lineage of the recent community outbreak in Taiwan.  
69 Since April 2022, a series of new waves of Omicron cases have surfaced in Taiwan  
70 and spread throughout the island. We conducted genomic surveillance with a high  
71 success rate and have submitted 1966 full-length Omicron sequences to GISAID. This  
72 has permitted identification of signature amino acid changes (ORF1a:L631F, S:K97E,  
73 N:M322I) in 1584 (80.6%) of the translated SARS-CoV-2 sequences. The newly  
74 established BA.2.3.7 lineage, which is relatively common in Asian countries, is now  
75 persistently present in Taiwan. By June 2022 this dominant strain had established a  
76 substantial existence in the sequence pool, resulting in additional mutations. The rapid  
77 spread and expansion of the Omicron BA.2.3.7 lineage in Asia has had an important  
78 socioeconomic impact on health policy.

79

## 80 INTRODUCTION

81 The coronavirus disease 2019 (COVID-19) pandemic, caused by severe acute  
82 respiratory syndrome coronavirus 2 (SARS-CoV-2), originated in the People's  
83 Republic of China (PRC) in late 2019, probably in the city of Wuhan(1-3). The  
84 outbreak of this unusual respiratory disease led to a wide variety of different  
85 responses by various countries across the world(4-7). The response of Taiwan was  
86 rapid and based on both its proximity to the PRC and its experiences during the SARS  
87 pandemic almost two decades earlier(6, 8, 9). The introduction of almost complete  
88 travel restrictions on incoming air and sea passengers, long compulsory quarantine  
89 periods for the few residents who were allowed to enter Taiwan and a very wide  
90 acceptance by the population of social distancing, temperature checks, mask wearing,  
91 etc., in all social situations, meant that, unlike many other countries, the entry of the  
92 COVID-19 pandemic was delayed significantly(6, 10, 11). Until April 2022, there  
93 were only limited breakthroughs, all of which were quickly contained; these were  
94 associated with cases detected among the very limited number of travelers entering  
95 the country who were hospitalized on being identified as being infected and airline  
96 crews. Hence, Taiwan provides a unique opportunity to explore what happened when

97 the Omicron variant evaded the controls put in place by the Taiwan government and  
98 began to spread through the country's population. The Taiwanese population had not  
99 been exposed on a large scale to any of the virus variants before Omicron and by the  
100 time the virus began to spread widely in March/April 2022, a significant percentage of  
101 the population had been vaccinated. As a result, an in-depth exploration of the virus  
102 using high-throughput sequencing as it spread provides new insights into how a novel  
103 pandemic virus enters and spreads in a mostly naïve population. In the current study,  
104 we have collected a large numbers of Omicron sequences from domestic cases and  
105 applied phylogenetic analysis to gain insights about the introduction of the new  
106 Omicron variants into Taiwan and the evolution of genomic sequences during rapid  
107 expansion of the viral pool over a time period of 15 weeks (from February 22<sup>nd</sup> to  
108 June 6<sup>th</sup>).

109

110

111

112

113

114 **METHODS**

115 We applied Illumina COVIDSeq amplicon sequencing technology to the whole-  
116 genome analysis of SARS-CoV-2(12). RNA was extracted from virus-inactivated  
117 swab samples. Complementary DNA synthesis was carried out using the reagents  
118 provided by the manufacturer, by which the SARS-CoV-2 genome underwent reverse  
119 transcription and was then amplified in 98 overlapping amplicons, together with  
120 appropriate human controls. In the finally optimized procedure, we processed 384  
121 samples at a time, and analyzed the pooled libraries on a single lane of the S4 chip  
122 using the NovaSeq6000 instrument.

124 **Patients and RNA extraction**

125 Cases were recruited from National Taiwan University Hospital Hsinchu Branch  
126 (NTU-HCH). Samples for RNA extraction were collected in 3 mL sterile viral  
127 transport medium (VTM) tubes and consisted of 2405 nasopharyngeal swabs  
128 belonging to 2339 patients. RNA was prepared by automated extraction using the  
129 TAINBead Nucleic Acid Extraction Kit REF M665A46 (Taiwan Advanced Nanotech



130 Inc.) and the QIAasymphony SP protocol (QIAGEN). This study was reviewed and  
131 approved by the Research Ethics Committee (110-110-E) of NTU-HCH.

132

### 133 **COVIDseq**

134 We carried out the sequencing using Illumina COVIDSeq Test kits (RUO version)  
135 according to the manufacturer's instructions. The workflow consists the following  
136 steps: cDNA synthesis, then virus target amplification using V3 nCov-2019 primers,  
137 followed by library preparation and library pooling. Subsequently, 98 targets on  
138 SARS-CoV-2 and 11 human fragments, which acted as controls, were analyzed on a  
139 NovaSeq 6000 instrument by using 2x151-bp paired-end reads. Next, we used  
140 Illumina DRAGEN COVID Lineage app version 3.5.9 (base on pangolin 4.1.2  
141 pangolin-data 1.12 and NextClade 1.11.0) in the BaseSpace Sequence Hub for rapid  
142 analysis.

143

### 144 **Phylogenetic analysis**

145 A set of 1966 NTU-HCH sequences were deposited to the Global Initiative on  
146 Sharing All Influenza Data (GISAID)(13) with the following epi accession numbers:

147 EPI\_ISL\_14192849 to EPI\_ISL\_14192840, EPI\_ISL\_14191496 to  
148 EPI\_ISL\_14191488, EPI\_ISL\_14191320 to EPI\_ISL\_14190364, and  
149 EPI\_ISL\_14190353 to EPI\_ISL\_14189364. To investigate the global transmission,  
150 249 BA.2.3.7, 282 global, and 403 additional sequences from Taiwanese were  
151 retrieved from GISAID as of July 2022. A total of 2847 sequences including 1966  
152 from NTU-HCH and 881 reference sequences (**Supplementary Data: S Table 1**) that  
153 had met the quality standard were used for the analysis. The phylogenetic tree was  
154 constructed using Nextstrain CLI (command-line interface) (version 3.2.5)(14) and  
155 visualized with Auspice (<https://auspice.us/>).

156

157

158

159

160 **RESULTS**

161 As shown in Figure 1, very few COVID-19 cases occurred in Taiwan during  
162 2020 and 2021. Clustered infections were reported in May and June 2021, mainly in  
163 northern Taiwan. Even at their peak, only hundreds of positive cases were recorded by  
164 Taiwan's Centers for Disease Control (CDC) (**Insert of Figure 1**). At the beginning of  
165 2022, a number of Omicron infection clusters were noted first in northern Taiwan, and  
166 very soon new cases began to exceed fifty thousand per day with the outbreaks  
167 affected the entire country (<https://nidss.cdc.gov.tw/nidss/disease?id=19CoV>). To  
168 gain insights about the community transmission of the infection and to monitor viral  
169 evolution, we established a genomic surveillance program at National Taiwan  
170 University Hospital Hsinchu Branch (NTU-HCH) and conducted whole-genome  
171 sequencing using left-over nasal swab samples that had been detected by PCR to be  
172 positive.

174 **Pilot phase of genomic surveillance for COVID-19**

175 In order to conduct genomic surveillance of SARS-CoV-2, we have adopted the  
176 COVIDSeq procedure (Illumina). Initially we used the ultrashort read (2 x 51 bp)

177 approach in order to obtain real-time information. Later we modified the procedure  
178 and applied the libraries created from 384 samples onto a single lane of an Illumina  
179 S4 chip, which typically was able to generate over 700 Gb data. In principle, this  
180 sequencing depth should give almost 60,000-fold coverage of the virus' 29,932 bp  
181 genome. During the pilot phase when we were establishing the genomic surveillance  
182 program, we analyzed 293 samples from 228 patients in three batches (**Figure 1**,  
183 batches 1-3), and most of these cases had been collected during 2021 from three  
184 hospitals in northern Taiwan (**Supplementary Data, S Table 2**). From this limited  
185 number of cases that were associated with various small community outbreaks in  
186 Taiwan (Insert of Figure 1), we found that these sequences mainly belonged to the  
187 Alpha lineage (B.1.1.7), and they included sequences from a cluster infection  
188 affecting a factory near our hospital.

#### 190 **Serial Investigation of SARS-CoV-2 in a medical center**

191 Beginning in 2022, we gradually expand the application of the established  
192 genomic surveillance protocol to conduct a series of investigation on samples  
193 collected at NTU-HCH. From end of February to beginning of June, there was a huge

194 surge in cases due to infection with Omicron variants of SARS-CoV-2 (**Figure 1**).

195 These samples became the major source providing the genome sequences for the

196 current study. There were in total 2112 PCR-positive swab lysates analyzed and these

197 consisted of one set of 192 samples (batch 4) and five sets of 384 samples (batch 5)

198 (**Figure 1 and Supplementary Data, S Table 2**). Except for one case, all subjects

199 provided one PCR+ sample for the viral genome analysis. Clinical information on the

200 1920 subjects recruited for batch 5 at NTU-HCH is readily available, and the general

201 characteristics of these COVID-19 infected individuals are shown in Table 1. Almost

202 an equal number of males and females were recruited, and, among them, 103 and 430

203 individuals had an age below 2 and an age between 2 and 20, respectively. Six

204 hundred and eight (31.7%) of the patients had been admitted to NTU-HCH for

205 treatment, while 83 (4.3%) of them were symptom free. As expected, the young age

206 group (below 2 years) and the old age group (over 60 years) were found to form larger

207 proportion of the hospitalized patients.

208

209 **Success rate when calling a variant**

210 The established protocol was highly efficient at generating a large amount of  
211 genomic information that allowed the identification of the viral lineage of each  
212 individual sample; furthermore, it also allowed reliable genome assembly for  
213 subsequent phylogenetic analysis. For practical purposes, we defined a successful call  
214 if the DRAGEN COVID Lineage software (v3.5.9) returned identifiable lineage  
215 information for a sample. Combining the pilot phase (batches 1-2 of 2021) and the  
216 serial investigation phase (batches 3-5 of 2022), in total we have performed 2405  
217 genomic analyses and determined SARS-CoV-2 lineage for 2368 individuals (success  
218 rate, 98.5 %). Of the samples that failed to generate reliable sequence, the majority  
219 had a Ct value of 29 or greater. Only four samples with a Ct value of 28 or less failed  
220 to generate a reliable lineage information. Thus, the overall success rate of calling a  
221 lineage was largely determined by the Ct value, and perhaps, to some extent, the  
222 storage time and condition of the sample. For the last five batches of 384 samples  
223 each, the majority were processed within 4 weeks and had Ct values of 28 or less;  
224 these had a success rate of 99.7% (1914/1920).

225

226 **GISAID submission**

227 Specifically, we have only submitted genomic data to GISAID on those  
228 sequences that had a greater than 98% coverage of the 29903 bp SARS-CoV-2 target  
229 genome. The same set of high-quality sequences were used for tracking the signature  
230 mutations in the viral samples (**Figure 2**) and for phylogenetic analysis (**Figure 3**).  
231 Overall, 2424 samples of all five batches generated 2024 sequences (84.2% pass rate)  
232 that met the above criterion. For the last five batches of 384 samples, 1720 of the  
233 1920 sequences was selected (89.6 % pass rate) for GISAID submission  
234 (**Supplementary Data, S Table 3**). These samples were obtained between April 26<sup>th</sup>  
235 and June 6<sup>th</sup>, during the peak of the present Omicron outbreak.

### 237 **Signature mutations of the BA2.3.7 lineage**

238 We analyzed the assembled viral genome sequences and searched for significant  
239 amino acid changes in the Omicron samples collected in 2022 (**Supplementary Data,**  
240 **S Table 4**). Comparing the later three data sets (batch 3 to batch 5), we discovered  
241 that three amino acid changes (ORF1a:L631F, S:K97E, N:M322I) occurred only after  
242 the fourth sequencing batch. All the Batch 3 isolates belonged to the BA.1 or BA.2  
243 classification. This suggests that the rapid increase of cases in Taiwan in April and

244 May, from previously zero cases per day, to almost reaching a hundred thousand per  
245 day, came from a strain that was evolving in Taiwan and showed either advantageous  
246 viral replication or advantageous transmissibility. The percentage of sequences  
247 containing the signatures progressed steadily from 62 % in batch 4 to 85% in batch 5.

248 Of the three signature mutations shown in Figure 2A, the L631F mutation in  
249 ORF1a and K97E mutation in the S protein are located within nsp2 and the N-  
250 terminal domain of S1, respectively. The third signature mutant of variant BA.2.3.7 is  
251 a methionine to isoleucine substitution at amino acid 322 (M322I) of the N protein.  
252 Both methionine and isoleucine are nonpolar amino acids. Previous reports have  
253 suggested that M322I could bring about a slight decrease in N protein thermal  
254 stability(15) and might affect the host immune response to COVID-19 viral  
255 infection(16).

256

### 257 **Evolution of the Omicron BA.2.3.7 lineage**

258 Serial investigation of the collected samples by whole-genome sequencing allowed us  
259 to monitor the continuous evolution of the Omicron BA.2.3.7 lineage, as it became  
260 the dominant strain of Taiwan (**Figure 2B**). In the 15-week period of February 22<sup>nd</sup> to



261 June 6<sup>th</sup>, there has been a sharp increase of the Omicron variant BA.2.3.7 at week 5  
262 (March 23<sup>th</sup> to March 29<sup>th</sup>) and the proportion of this variant remained at over 80%  
263 level for ten weeks (**Figure 2B**). Of note, a steady increase of sequences positive for  
264 S:G1251V started at week 6 and reached plateau at week 10 (April 26<sup>th</sup>–May 2<sup>nd</sup>). By  
265 contrast, over the time period week 10 to week 15, the percentage of ORF1a:T3224A  
266 decreased, while that of ORF1a:A591V and ORF1a:V3683I increased, suggesting that  
267 these sublineages might have different transmission efficiencies. Moreover, a new  
268 mutation, ORF1a: I1091T, was detected during week 13 and the incidence had  
269 increased substantially by weeks 14-15.

270

### 271 **Phylogenetics of the SARS-CoV-2 isolates**

272 To construct the framework of the phylogenetic tree, first we took 1966 genome  
273 sequences from this study and analyzed them in the global context of 872 GISAID  
274 reference sequences (**Figure 3A**). On this basis, we then zoomed in and compared the  
275 1584 Omicron sequences of the current study against the 228 Omicron BA.2.3.7  
276 strains from the GISAID database (**Figure 3B**). These sequences had been reported

277 from 21 countries, including 51 from Taiwan (**Supplementary Data, S Table 1 and**  
278 **5**).

279 We interpreted the phylogenetic analysis in the context of Pango-dynamic  
280 nomenclature system(16). On May 16<sup>th</sup>, an issue was raised regarding a BA.2.3  
281 sublineage with S:K97E ([https://github.com/cov-lineages/pango-](https://github.com/cov-lineages/pango-designation/issues/643)  
282 [designation/issues/643](https://github.com/cov-lineages/pango-designation/issues/643)). It was suggested that “this new sublineage” might have a  
283 very high prevalence in Taiwan, and it might be descended from a mainly Vietnamese  
284 branch with ORF1a:L631F and N:M322I. Later, BA.2.3.7 was designated, and as of  
285 July 22<sup>nd</sup>, there have been 222 sequences in the BA.2.3.7 lineage detected since it was  
286 identified on February 27<sup>th</sup> (Lineage Report, [https://outbreak.info/situation-](https://outbreak.info/situation-reports?pango=BA.2.3.7)  
287 [reports?pango=BA.2.3.7](https://outbreak.info/situation-reports?pango=BA.2.3.7)).

288 It is evident that this novel lineage BA.2.3.7 with three amino acid changes  
289 (ORF1a:L631F, ORF1a:S:K97E, and N:M322I) was circulating dominantly in  
290 Taiwan over the study period (**Figure 3B**, BA.2.3.7 branch, marked in red). Notably,  
291 the first BA.2.3.7 strain identified in the epidemic in Taiwan was collected on March  
292 27<sup>th</sup>, 2022, and, since that point, we have already detected several genomic changes of  
293 this new Omicron lineage. For example, a new mutation, G1251V (**Figure 3B**,

294 marked in green) in Spike protein, was detected from April onwards, and this  
295 particular circulating lineage has rapidly spread across Taiwan.

296

### 297 **Persistent dominance of Omicron BA.2.3.7 lineage**

298 While this paper was in preparation, we became aware that a number of viral  
299 sequences with the same signature mutations had been reported from Taiwan  
300 ([https://outbreak.info/situation-reports?pango=BA.2.3.7&loc=USA&loc=USA\\_US-  
301 CA&loc=TWN&selected=TWN&overlay=false](https://outbreak.info/situation-reports?pango=BA.2.3.7&loc=USA&loc=USA_US-CA&loc=TWN&selected=TWN&overlay=false)). Even though the number was  
302 relatively small (51 cases) as compared to our serial investigation at a medical center,  
303 the four locations in Taiwan of the reported cases are different from our collection  
304 point at the hospital, indicating that this new lineage was detectable broadly across  
305 Taiwan. Based on this distribution, it is very likely that the BA.2.3.7 lineage is now  
306 the dominant variant throughout Taiwan.

307 Notably, over the same time period, other Asia Pacific countries (Hong  
308 Kong/PRC, Indonesia, Singapore, Vietnam, Japan, Thailand, Philippines, New  
309 Zealand, and Malaysia) have also reported significant cumulative prevalence of the  
310 BA.2.3.7 variant (**Supplementary Data, S Table 5**). Among the 44 Omicron

311 BA.2.3.7 strains reported from Japan, two of the affected individuals had travel  
312 history to Vietnam and 41 to Taiwan, suggesting significant silent outward  
313 transmission events from Taiwan. By way of contrast, BA.2.3.7 forms less than 0.5%  
314 of the sequences reported in either California, USA, or globally.

315

316

317

318

319

320

321

322

323

324

325

326

327

328 **DISCUSSION**

329 In the Western world, where there have been less restrictions on travel and  
330 people have shown poorer adherence to wearing facial masks, COVID-19 outbreaks  
331 have occurred in several waves as SARS-CoV-2 evolved. These seem to have been,  
332 originally associated in many cases with persistent infections in immunocompromized  
333 patients, they then, have adapted to the human populations in the various countries.  
334 From 2020 to 2022, there have been several changes in the dominant viral lineages,  
335 with new more transmissible strains replacing previous prevailing lineages.

336 The entry of the Omicron variant into Taiwan in early 2022 was unexpected as  
337 the track-and-trace system put in place from January 2020 onwards had been very  
338 successful with only a limited number of community outbreaks in 2021, each of  
339 which was traced to source and controlled. In early 2022, vaccination against SARS-  
340 CoV-2 in Taiwan had reached nearly 90 % (for at least one dose) of the 23 million  
341 population ([covid-19.nchc.org.tw](https://covid-19.nchc.org.tw); Taiwan CDC data). This population is highly  
342 urbanized with about a quarter of the population living in the Greater Taipei Area. So  
343 as Omicron began to spread, it was within a naïve but vaccinated population.  
344 Taiwanese have shown high levels of compliance with social distancing and mask

345 wearing, so the spread of Omicron was in a unique environment, unlike Europe, the  
346 USA and Canada, South America, Africa or even New Zealand. The Omicron variants  
347 detected in Taiwan are likely to be those that have evolved to escape the specific  
348 conditions found in Asia; this means that these “Asian” strains have undergone  
349 selection such that they are highly transmissible, produce silent infections without  
350 symptoms and have the ability to escape the vaccines used in Taiwan. In conjunction  
351 with these phenotypes, another possibility is that the ethnicity of Taiwan's population  
352 may have played a role. There is believed to have been a coronavirus outbreak in Asia  
353 more than 20,000 years ago (17) and the selection imposed by this may have changed  
354 the genetics of the Taiwan population.

355 The failure to control the 2022 Omicron outbreak may rest on the fact that there  
356 were multiple and almost simultaneous entry of different SARS-CoV-2 variants,  
357 unlike earlier breakthrough events, and that many of these infections were silent. The  
358 often-silent nature of Omicron would have allowed the development of community  
359 outbreaks beyond the available control measures. Notwithstanding the possibility of  
360 multiple entry events into Taiwan of the BA.2.3-related variants, there seems to have  
361 significant diversity of the viral strains circulating in Taiwan. Importantly, the large

362 numbers of quality sequences we have collected contribute to the identification of  
363 some less frequent mutations (ORF1a: A591V, ORF1a: T3224A, ORF1a: V3683I)  
364 within the BA.2.3.7 lineage (**Supplementary Data, S Table 4**). It is likely that further  
365 evolution of the BA.2.3.7 lineage in Taiwan has occurred (**Figure 3**), as new groups  
366 of the SARS-CoV-2 sequences are becoming evident. Based on the phylogeny and the  
367 signature mutations, we have divided the BA.2.3.7 isolates into at least five genotypic  
368 groups, each with clearly defined sequence features (**Figure 3**).

369 The emergence of Omicron BA.2.3.7 in Asia is remarkable. While there is no  
370 reliable genomic data from the early cases arising from Malaysia and Vietnam, our  
371 phylogenetic analysis and the metadata from GISAID indicate that travelling between  
372 Asian countries have contributed to the rapid spread of this unique Omicron lineage in  
373 this region. The majority of Omicron BA.2.3.7 cases reported from Japan in May  
374 2022 had travel history to Taiwan, and the GISAID sequences clearly indicated that  
375 they were related to two branches of the phylogenetic tree (**Figure 3B**), one with  
376 S:G1251V mutation and one without.

377

378 In conclusion, our genomic dataset is uniquely valuable for understanding how a  
379 major COVID-19 outbreak occurred in a naïve and vaccinated population in Taiwan  
380 with a very limited number of entry events. As Asian countries began to move from  
381 zero tolerance to gradual opening policy, continued surveillance of SARS-CoV-2  
382 using NGS is important. Early detection of significant viral evolution in the endemic  
383 areas will minimize any disruption due to a new variant.

384

385

386

387

388

389

390

391

392

393

394



395 **REFERENCES**

- 396 1. World Health Organization. WHO statement regarding cluster of pneumonia  
397 cases in Wuhan, China. Jan 9, 2020. [cited 2022 SEP 18]  
398 [https://www.who.int/china/news/detail/09-01-2020-who-statement-regarding-](https://www.who.int/china/news/detail/09-01-2020-who-statement-regarding-cluster-of-pneumonia-cases-in-wuhan-china)  
399 [cluster-of-pneumonia-cases-in-wuhan-china](https://www.who.int/china/news/detail/09-01-2020-who-statement-regarding-cluster-of-pneumonia-cases-in-wuhan-china)
- 400 2. Lu, H., Stratton, C. W. & Tang, Y. W. Outbreak of pneumonia of unknown  
401 etiology in Wuhan, China: The mystery and the miracle. *J Med Virol* **92**, 401-  
402 402, doi:10.1002/jmv.25678 (2020).
- 403 3. Zhu, N. *et al.* A Novel Coronavirus from Patients with Pneumonia in China,  
404 2019. *N Engl J Med* **382**, 727-733, doi:10.1056/NEJMoa2001017 (2020).
- 405 4. Ritchie, H. *et al.* Coronavirus Pandemic (COVID-19). *Published online at*  
406 *OurWorldInData.org*. Retrieved from: '<https://ourworldindata.org/coronavirus>'  
407 [Online Resource] (2020)
- 408 5. Jung, A. S. *et al.* National responses to covid-19: drivers, complexities, and  
409 uncertainties in the first year of the pandemic. *BMJ* **375**, e068954,  
410 doi:10.1136/bmj-2021-068954 (2021).

- 411 6. Summers, J. *et al.* Potential lessons from the Taiwan and New Zealand health  
412 responses to the COVID-19 pandemic. *Lancet Reg Health West Pac* **4**,  
413 100044, doi:10.1016/j.lanwpc.2020.100044 (2020).
- 414 7. Tsou, H. H. *et al.* A comprehensive evaluation of COVID-19 policies and  
415 outcomes in 50 countries and territories. *Sci Rep* **12**, 8802,  
416 doi:10.1038/s41598-022-12853-7 (2022).
- 417 8. Chen, S. C. Taiwan's experience in fighting COVID-19. *Nat Immunol* **22**, 393-  
418 394, doi:10.1038/s41590-021-00903-2 (2021).
- 419 9. Wang, C. J., Ng, C. Y. & Brook, R. H. Response to COVID-19 in Taiwan: Big  
420 Data Analytics, New Technology, and Proactive Testing. *JAMA* **323**, 1341-  
421 1342, doi:10.1001/jama.2020.3151 (2020).
- 422 10. Gong, Y. N. *et al.* SARS-CoV-2 genomic surveillance in Taiwan revealed  
423 novel ORF8-deletion mutant and clade possibly associated with infections in  
424 Middle East. *Emerg Microbes Infect* **9**, 1457-1466,  
425 doi:10.1080/22221751.2020.1782271 (2020).

- 426 11. Lin, C. *et al.* Policy Decisions and Use of Information Technology to Fight  
427 COVID-19, Taiwan. *Emerg Infect Dis* **26**, 1506-1512,  
428 doi:10.3201/eid2607.200574 (2020).
- 429 12. Bhojar RC, Jain A, Sehgal P, Divakar MK, Sharma D, Imran M, et al. High  
430 throughput detection and genetic epidemiology of SARS-CoV-2 using  
431 COVIDSeq next-generation sequencing. *PLoS One*. 2021;16(2):e0247115.
- 432 13. Shu Y, McCauley J. GISAID: Global initiative on sharing all influenza data -  
433 from vision to reality. *Euro Surveill*. 2017 Mar 30;22(13).
- 434 14. Hadfield J, Megill C, Bell SM, Huddleston J, Potter B, Callender C, et al.  
435 Nextstrain: real-time tracking of pathogen evolution. *Bioinformatics*. 2018 Dec  
436 1;34(23):4121-3.
- 437 15. Dong H, Wang S, Zhang J, Zhang K, Zhang F, Wang H, et al. Structure-Based  
438 Primer Design Minimizes the Risk of PCR Failure Caused by SARS-CoV-2  
439 Mutations. *Front Cell Infect Microbiol*. 2021;11:741147.
- 440 16. Azad GK. Identification and molecular characterization of mutations in  
441 nucleocapsid phosphoprotein of SARS-CoV-2. *PeerJ*. 2021;9:e10666.

442 17. Souilmi Y, Lauterbur ME, Tobler R, Huber CD, Johar AS, Moradi SV, et al.

443 An ancient viral epidemic involving host coronavirus interacting genes more

444 than 20,000 years ago in East Asia. *Curr Biol.* 2021 Aug 23;31(16):3504-14

445 e9.

446

447 **ACKNOWLEDGEMENTS**

448 This work was supported by Ministry of Health and Welfare of Taiwan (MOHW110-  
449 TDU-C-222-000010) to S.F.T., by the Research Center for Emerging Viral Infections  
450 from The Featured Areas Research Center Program within the framework of the  
451 Higher Education Sprout Project by the Ministry of Education (MOE) of Taiwan, the  
452 National Science and Technology Council (NSTC), Taiwan (NSTC 111-2321-B-182-  
453 001, 111-2634-F-182-001, and 111-2221-E-182-053-MY3), and the National Institute  
454 Of Allergy And Infectious Diseases of the National Institutes of Health under Award  
455 Number 5U01AI151698-02 to Y.N.G. and S.R.S. The authors wish to thank Y Henry  
456 Sun and Hsiao-Hui Tso for critical reading of the manuscript, to Yi-Chun Tsai, Shuo-  
457 Peng Chou, Jhen-Rong Huang, and Yuan-Yu You for sample collection and nucleic  
458 acid preparation, to Tai-Yun Lin, Yu-Chen Huang and Chiao-Chan Wang for library  
459 construction and sequencing operation.

460

461

462

463

464 **AUTHOR CONTRIBUTION**

465 P.L.S. collected clinical specimens and performed clinical data analysis. H.C.T.  
466 performed COVIDseq and drafted the manuscript. Y.N.G. performed phylogenetic  
467 analyses and drafted the manuscript. H.Y.S. performed mutation signature analyses  
468 and manuscript preparation. R.K., Y.L.W., and W.J.C. interpreted data and prepared  
469 the manuscript. L.Y.H. and H.Y.Y. collected clinical samples and performed nucleic  
470 acid extraction. H.Y.K. and Y.C.H. managed clinical data and analyzed clinical data.  
471 Y.F.L. and H.Y.W analyzed genomic data. C.C.C. collected samples and performed  
472 viral analysis. T.W.C. collected samples and analyzed clinical data. K.M.L. and  
473 C.G.H. established protocols and processed samples. S.R.S. performed the virology  
474 study and functional analysis. C.C.W., C.J.Y., and S.F.T. managed the project and  
475 prepared the manuscript.

476

477

478

479

480

481 About the Author

482 Dr. Shao is an assistant professor in Department of Laboratory Medicine and  
483 Pediatrics, National Taiwan University College of Medicine, Taiwan. Her main  
484 research interests include infectious disease, clinical virology, clinical microbiology,  
485 and vaccines.

486  
487 Dr. Tu is postdoctoral fellow in Institute of Molecular and Genomic Medicine,  
488 National Health Research Institutes, Taiwan. Her research interests include cancer and  
489 genomic research and NGS technology.

490  
491 Dr. Gong is an assistant professor in Research Center for Emerging Viral Infections  
492 and International Master Degree Program for Molecular Medicine in Emerging Viral  
493 Infections, Chang Gung University, Taiwan. His research interests include  
494 bioinformatics, phylogenetics, machine learning, and viral evolution.

495

**Main Data**

**Table 1. Characteristics of the COVID-19 cases recruited for the current study**

**Figure 1. Community outbreaks of COVID-19 in Taiwan**

**Figure 2. Signature mutations of the Omicron BA.2.3.7 lineage**

**Figure 3. Phylogenetics of the SARS-CoV-2 isolates**



**Table 1. Characteristics of the COVID-19 cases recruited for the current study**

| Age (Yr)     | 0-2        | 2-20        | 20-60       | Above 60    | Total       |
|--------------|------------|-------------|-------------|-------------|-------------|
| Number       | 103        | 430         | 892         | 495         | 1920        |
| Male         | 56 (54.4%) | 250 (58.1%) | 374 (41.9%) | 258 (52.1%) | 938 (48.9%) |
| Female       | 47 (45.6%) | 180 (41.9%) | 518 (58.1%) | 237 (47.9%) | 982 (51.1%) |
| Hospitalized | 43 (41.7%) | 35 (8.1%)   | 153 (17.2%) | 377 (76.2%) | 608 (31.7%) |
| Asymptomatic | 0 (0%)     | 1 (0.2%)    | 66 (7.4%)   | 16 (3.2%)   | 83 (4.3%)   |

**FIGURE 1: Community outbreaks of COVID-19 in Taiwan**

This figure was constructed using the publicly available data of Taiwan CDC (<https://nidss.cdc.gov.tw/nndss/disease?id=19CoV>) to show the relative size of community outbreaks of COVID-19 in 2021 and 2022. Genomic surveillance was conducted in five batches to sequence the SARS-CoV-2 viral samples, and the height reflects the number of cases analyzed for each batch. The 2021 outbreak of Alpha lineage was relatively small and limited to cluster infection within New Taipei City (shown in the insert), while the outbreak of the Omicron lineage in April- June of 2022 exceeded 50,000 per day at peak level.

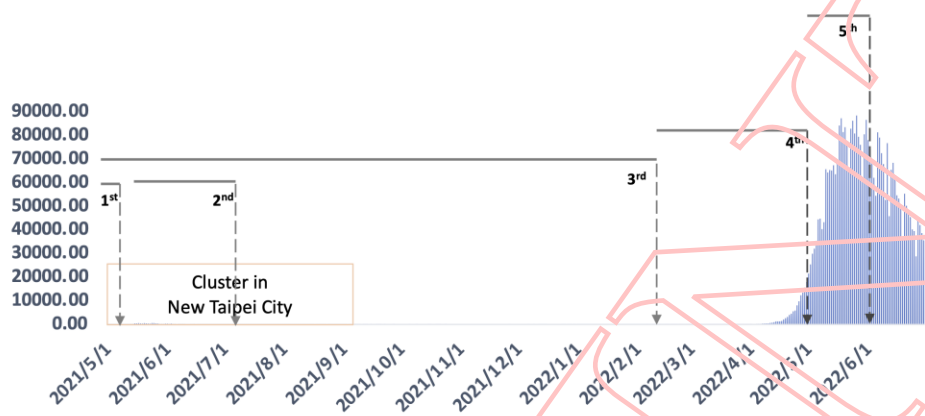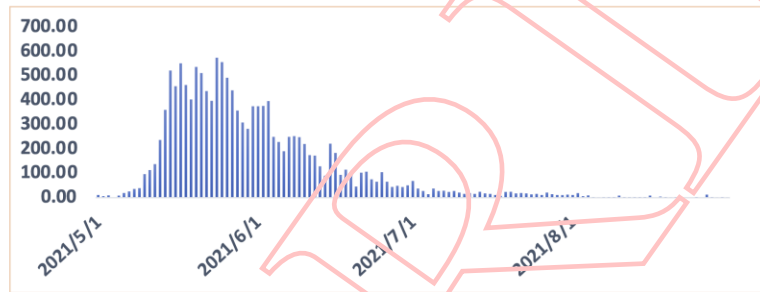

**FIGURE 2: Signature mutations of the Omicron BA.2.3.7 lineage**

2A. Mutations in the coding sequences of the Omicron lineages. The mutations identified in this study are highlighted in red. RBD: the receptor binding domain of the spike (S) protein.

2B. Proportion of the different signature mutations in the period of February 22<sup>nd</sup> to June 6<sup>th</sup>, 2022. Note that there was a sharp increase of the Omicron variant 2.3.7 from week 4 onwards, and the proportion of this Omicron variant remained high for at least ten weeks. The three signature mutations (S:K97E, N:M322I, ORF1a:L631F) of BA.2.3.7, denoted by filled diamonds, filled triangles, and open circles, are completely overlapped. A steady increase of sequences positive for S:G1251V was noted from week 6 and reached plateau at week 10 (April 26<sup>th</sup>-May 2<sup>nd</sup>). In the period of week 11 (May 3<sup>rd</sup>-May 9<sup>th</sup>), week 12 (May 10<sup>th</sup>-May 16<sup>th</sup>), week 13 (May 17<sup>th</sup>-May 23<sup>rd</sup>), week 14 (May 24<sup>th</sup>-May 30<sup>th</sup>), and week 15 (May 31<sup>st</sup>- June 6<sup>th</sup>), the percentage of ORF1a:T3224A decreased; the percentage of ORF1a:I10917 increased over the same time period.

Fig.2A

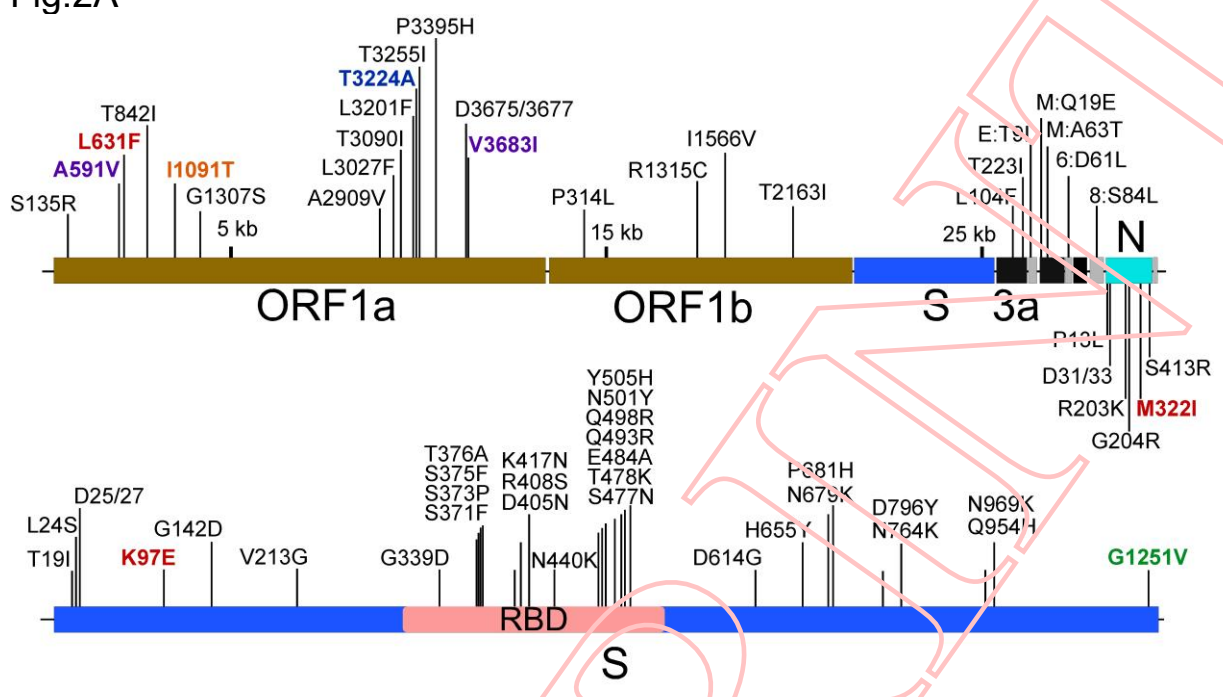

Fig.2B

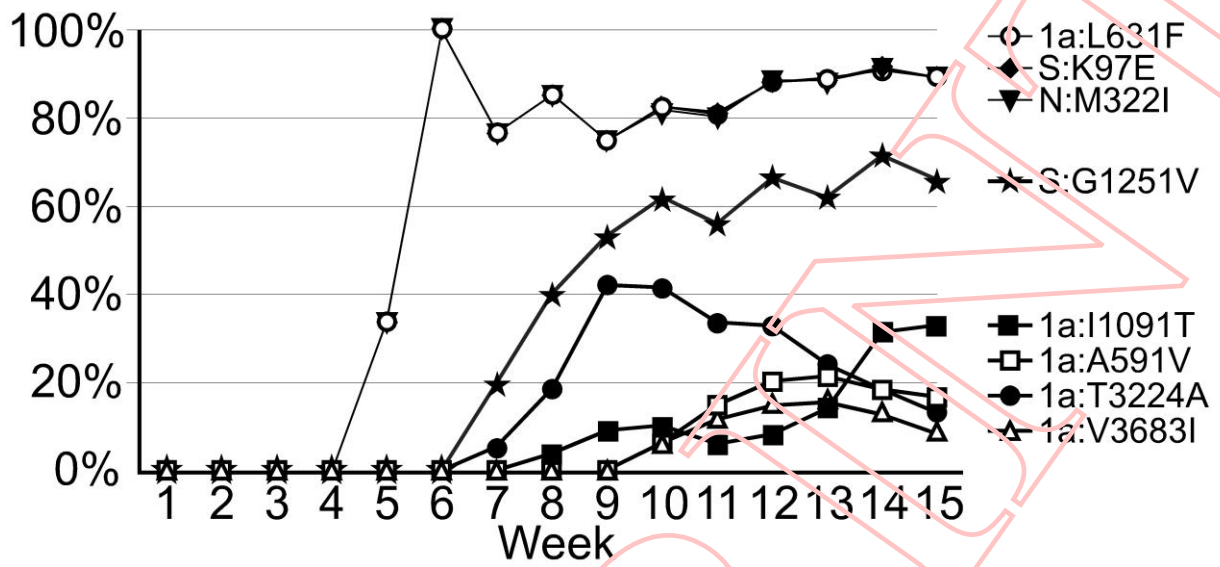

### Figure 3. Phylogenetic analysis of the SARS-CoV-2 sequences

3A. We used 1966 sequences from NTU-HCH and 881 sequences from GISAID as a framework for constructing the phylogenetic tree.

3B. We analyzed 1584 BA.2.3.7 sequences submitted to GISAID from the current study together with 228 BA.2.3.7 sequences deposited to GISAID by other groups. The position of signature mutations are indicated; three (S:K97E, N:M322I, ORF1a:L631F) are located at the origin of the B.A.2.3.7 lineages. S:G1251V is mapped at a major branch in the upper trunk of the tree, under which three minor branches can be defined by mutations in ORF1a:T3224A in blue, ORF1a:A591V and ORF1a:V3683I in purple, and ORF1a:I1091T in orange. The origins of the BA.2.3.7 strains and their position in the tree are indicated. An arrow in red denotes the index case collected from Taiwan on March 27<sup>th</sup>, 2022.

Fig. 3A

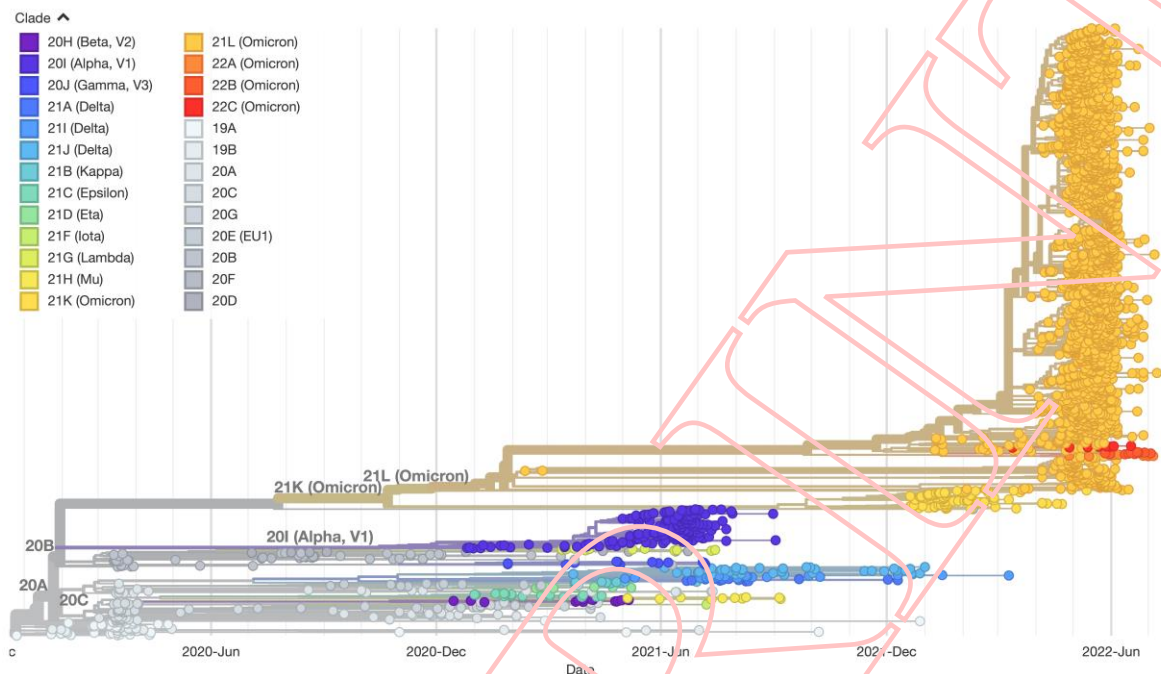



Fig. 3B

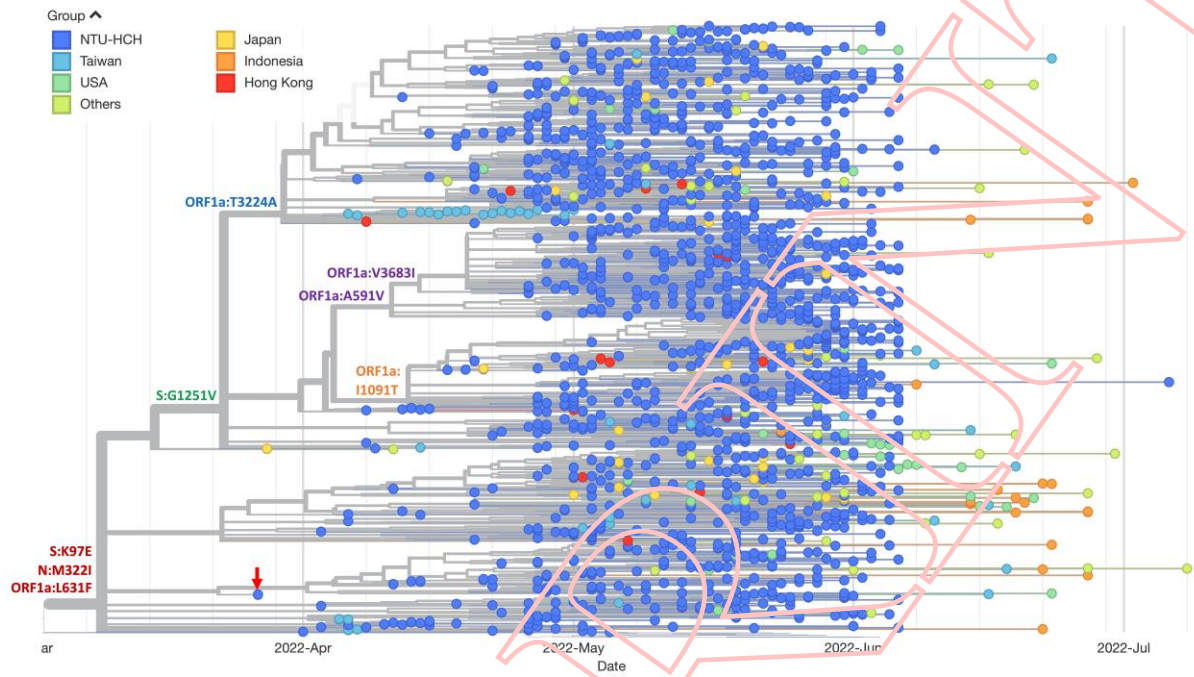

## **Supplementary Data**

**S Table 1. Acknowledgement of public sequences retrieved from GISAID and NCBI GenBank.**

**S Table 2**

**Samples and cases collected for this study as analyzed by the Illumina COVIDSeq system on NovaSeq6000**

**S Table 3**

**Sequences selected for GISAID submission and phylogenetics analysis**

**S Table 4**

**Mutations in the BA.2.3.7 sublineages**

**S Table 5**

**Submitted sequences of SARS-CoV-2 BA2.3.7 from different countries**

**S Table 1. Acknowledgement of public sequences retrieved from GISAID and NCBI GenBank.** We gratefully acknowledge the following Authors from the Originating laboratories responsible for obtaining the specimens, as well as the Submitting laboratories where the genome data were generated and shared via GISAID and GenBank, on which this research is based.

| strain                              | GISAID accession | Genbank accession | Originating lab                                                                                                                                                                     | Submitting lab                                           | authors                                                                                                                                                                                                                                                                                                                                                                                            |
|-------------------------------------|------------------|-------------------|-------------------------------------------------------------------------------------------------------------------------------------------------------------------------------------|----------------------------------------------------------|----------------------------------------------------------------------------------------------------------------------------------------------------------------------------------------------------------------------------------------------------------------------------------------------------------------------------------------------------------------------------------------------------|
| Wuhan/WH01/2019                     | EPI_ISL_406798   | LR757998          | BGI, Institute of Microbiology, Chinese Academy of Sciences, Shandong First Medical University and General Hospital of Central Theater Command of People's Liberation Army of China | Beijing Genome Institute                                 | Hunter et al                                                                                                                                                                                                                                                                                                                                                                                       |
| Wuhan-Hu-1/2019                     | EPI_ISL_402125   | MN908947          | ?                                                                                                                                                                                   | ?                                                        | Vu et al                                                                                                                                                                                                                                                                                                                                                                                           |
| Wales/ALDP-BCAAEB/2020              | EPI_ISL_710749   | OD905542          | Lighthouse Lab in Alderley Park                                                                                                                                                     | Wellcome Sanger Institute                                | Wynn et al                                                                                                                                                                                                                                                                                                                                                                                         |
| hCoV-19/Vietnam/NHTD-OUCRU2815/2022 | EPI_ISL_13298595 |                   | National Hospital for Tropical Diseases                                                                                                                                             | Oxford University Clinical Research Unit, Hanoi, Vietnam | Pham Ngoc Thach, Van Dinh Trang, Le Van Duyet, Nguyen Thi Kim Chi, Vu Ngoc Lien, Nguyen Thi Hang, Nguyen My Hanh, Nguyen Thi Hong Phuong, Tran Thi Van Dung, Ngo Thi Thu Hang, Nguyen Thi Nhu Ha, Luu Thi Dieu Lien, Nguyen Thu Trang, Nguyen Thi Hong Thuong, Trinh Cong Dien, Trinh Son Tung, Thomas Kesteman, Nguyen Thi Tam, H.Rogier van Doorn on behalf of the OUCRU COVID-19 research group |
| Vero/RUS/Dubrovka-37/2021           | ?                | ON380441          | ?                                                                                                                                                                                   | ?                                                        | Faizuloev et al                                                                                                                                                                                                                                                                                                                                                                                    |
| USA/WI-UW-189/2020                  | EPI_ISL_428285   | MT706317          | Milwaukee Public Health Department                                                                                                                                                  | UW-Madison                                               | Moreno et al                                                                                                                                                                                                                                                                                                                                                                                       |
| hCoV-19/USA/WA-UW-22050797001/2022  | EPI_ISL_13042178 |                   | UW Virology Lab                                                                                                                                                                     | UW Virology Lab                                          | Pavitra Roychoudhury, Pooneh Hajian, Seffir T. Wendm, Shah Mohamed Bakhsh, Sarai Luna, Isabel Arnould, Hong Xie, Sean Ellis, Saraswathi Sathees, Keith R Jerome, Alexander Greninger                                                                                                                                                                                                               |
| USA/WA-UW-2021041573410/2021        | EPI_ISL_1826154  | M7240582          | ?                                                                                                                                                                                   | ?                                                        | Roychoudhury et al                                                                                                                                                                                                                                                                                                                                                                                 |
| USA/WA-UW-2021041407333/2021        | EPI_ISL_1785896  | M2233339          | ?                                                                                                                                                                                   | ?                                                        | Roychoudhury et al                                                                                                                                                                                                                                                                                                                                                                                 |
| hCoV-19/USA/WA-S2021/2022           | EPI_ISL_13077945 |                   | Seattle Flu Study                                                                                                                                                                   | Seattle Flu Study                                        | Chris D. Frazar, Jover Lee, Erica Ryke, Luis Gamboa, Evan McDermot, Jeremy Stone, Tom Kolar, Peter D. Han, Thomas R. Sibley, Melissa Truong, Caitlin R. Wolf, Michael Boeckh, Janet A. Englund, Barry R. Lutz, Alpna Waghmare,                                                                                                                                                                     |

|                                                             |                      |              |                                          |                                                                                                    |  |                                                                                                                                                                                                                                                                                                                                                                                                                                                                                                                                                                                                                                                                                                                                                   |
|-------------------------------------------------------------|----------------------|--------------|------------------------------------------|----------------------------------------------------------------------------------------------------|--|---------------------------------------------------------------------------------------------------------------------------------------------------------------------------------------------------------------------------------------------------------------------------------------------------------------------------------------------------------------------------------------------------------------------------------------------------------------------------------------------------------------------------------------------------------------------------------------------------------------------------------------------------------------------------------------------------------------------------------------------------|
|                                                             |                      |              |                                          |                                                                                                    |  | Cerile Viboud, Lea M. Scarita, Jay Shendure, Trevor Bedford, Helen Y. Chu                                                                                                                                                                                                                                                                                                                                                                                                                                                                                                                                                                                                                                                                         |
| <b>USA/WA-S17899/2022</b>                                   | EPI_ISL_98<br>81504  | OM67619<br>2 | Seattle Flu Study                        | Seattle Flu Study<br>submission group                                                              |  | Nickerson et al                                                                                                                                                                                                                                                                                                                                                                                                                                                                                                                                                                                                                                                                                                                                   |
| <b>USA/WA-S1018/2020</b>                                    | EPI_ISL_46<br>3508   | MT642295     | Washington State<br>Department of Health | Seattle Flu Study<br>submission group                                                              |  | Nickerson et al                                                                                                                                                                                                                                                                                                                                                                                                                                                                                                                                                                                                                                                                                                                                   |
| <b>hCoV-19/USA/WA-<br/>PHL-022687/2022</b>                  | EPI_ISL_13607984     |              | Northwest Laboratory                     | Washington State<br>Department of Health<br>Public Health Laboratories                             |  | Drew MacKellar, Philip Dykema, Denny Russell, Holly Halstead, Kathryn Sickles, Kristin Roche, Ardizon Valdez, Claire Howell, Alex Lothum, JohnAric Peterson, Avi Singh, Rebecca Cao                                                                                                                                                                                                                                                                                                                                                                                                                                                                                                                                                               |
| <b>hCoV-19/USA/WA-<br/>CDC-<br/>UW22060631788/202<br/>2</b> | EPI_ISL_13356469     |              | UW Virology Lab                          | UW Virology Lab                                                                                    |  | Pavitra Roychoudhury, Isabel Arnould, Sarai Luna, Jeffir T. Wendm, Pooneh Hajjari, Hong Xie, Sean Ellis, Nathan Breit, Keith R Jerome, Patrick Mathias, Alexander Greninger                                                                                                                                                                                                                                                                                                                                                                                                                                                                                                                                                                       |
| <b>USA/WA-CDC-<br/>UW21070817852/202<br/>1</b>              | EPI_ISL_30<br>63685  | MZ688283     | UW Virology Lab                          | CDC-OAMD                                                                                           |  | Howard et al                                                                                                                                                                                                                                                                                                                                                                                                                                                                                                                                                                                                                                                                                                                                      |
| <b>USA/WA-CDC-<br/>UW21050348508/202<br/>1</b>              | EPI_ISL_21<br>04864  | MZ217580     | UW Virology Lab                          | CDC-OAMD                                                                                           |  | Howard et al                                                                                                                                                                                                                                                                                                                                                                                                                                                                                                                                                                                                                                                                                                                                      |
| <b>USA/WA-CDC-<br/>QDX36715281/2022</b>                     | EPI_ISL_12<br>874489 | ON574192     | Quest Diagnostics<br>Incorporated        | CDC-OAMD                                                                                           |  | Howard et al                                                                                                                                                                                                                                                                                                                                                                                                                                                                                                                                                                                                                                                                                                                                      |
| <b>USA/WA-CDC-<br/>QDX35136286/2022</b>                     | EPI_ISL_11<br>863199 | ON177504     | Quest Diagnostics<br>incorporated        | CDC-OAMD                                                                                           |  | Howard et al                                                                                                                                                                                                                                                                                                                                                                                                                                                                                                                                                                                                                                                                                                                                      |
| <b>hCoV-19/USA/WA-<br/>CDC-IC0735061/2022</b>               | EPI_ISL_13706296     |              | Laboratory Corporation of<br>America     | Centers for Disease<br>Control and Prevention<br>Division of Viral Diseases,<br>Pathogen Discovery |  | Dakota Howard, Dhvani Batra, Peter Cook, Jason Caravas, Benjamin Rambo-Martin, Scott Sammons, Yvette Unoarumhi, Matthew Schmerer, Kristine Lacek, Tymeckia Kendall, Victoria Caban Figueroa, Shatavia Morrison, Christopher Gulvick, Minoo Agarwal, Eyad Almasri, Debbie Boles, Ayla Burns, Nuthawin Charoensri, Oren Cohen, Susan Countryman, Mary Cristobal, Bobbi Croy, Suzanne Dale, Hrushikesh Deshmukh, Amanda Douglas, Vincent Drouillon, Marcia Eisenberg, Howard Engler, Rama Ghatti, Prashant Gupta, Susan Hicks, Jake Humphrey, Lax Iyer, Lisa Pfefferle, Manoj Jain, Matthew Robinson, Mohan Kolli, Brian Krueger, Tim Kuphal, Stanley Letovsky, Michael Levandoski, Craig Lukasik, Jonathan Meltzer, Brian Norvell, Mindy Nye, Scott |

|                                                 |                      |              |                                                             |                                                                              |   |                                                                                                                                                                                                                                                                                                                                                                             |
|-------------------------------------------------|----------------------|--------------|-------------------------------------------------------------|------------------------------------------------------------------------------|---|-----------------------------------------------------------------------------------------------------------------------------------------------------------------------------------------------------------------------------------------------------------------------------------------------------------------------------------------------------------------------------|
|                                                 |                      |              |                                                             |                                                                              |   | Parker, Christos<br>Petropoulos, John Pruitt,<br>Steven Ragan, Scott Ryan,<br>Mike Sapeta, Jana<br>Schroth, Suresh Selvaraju,<br>Goran Stevovic, Amanda<br>Suchanek, Andrea Throop,<br>Lyndon Tilson, Thomas<br>Urban, Joe Voshell,<br>Kimberly Wagner,<br>Jonathan Williams, Mary<br>Williamson, Qian Zeng,<br>Tricia Zwiefelhofer, Clinton<br>Paden, Duncan<br>MacCannell |
| USA/WA-CDC-<br>LC0044750/2021                   | EPI_ISL_43<br>78085  | OK233071     | ?                                                           | ?                                                                            | ? | Howard et al                                                                                                                                                                                                                                                                                                                                                                |
| USA/WA-CDC-2-<br>4044417/2020                   | EPI_ISL_90<br>3955   | MW55053<br>4 | ?                                                           | ?                                                                            | ? | Queen et al                                                                                                                                                                                                                                                                                                                                                                 |
| USA/VT-CDCBI-<br>CRSP_3VZDJZSOUC13<br>Y4HH/2022 | EPI_ISL_10<br>714527 | OM91738<br>6 | Broad Institute Clinical<br>Research Sequencing<br>Platform | Broad Institute Genomic<br>Center for Infectious<br>Diseases                 |   | Lemieux et al                                                                                                                                                                                                                                                                                                                                                               |
| USA/VSP1078/2021                                | EPI_ISL_30<br>22446  | MZ578660     | ?                                                           | ?                                                                            | ? | McCormick et al                                                                                                                                                                                                                                                                                                                                                             |
| USA/VA-CDC-<br>LC0259435/2021                   | EPI_ISL_44<br>84225  | OK279472     | ?                                                           | ?                                                                            | ? | Howard et al                                                                                                                                                                                                                                                                                                                                                                |
| USA/UW2104014338<br>1/2021                      | EPI_ISL_10<br>515196 | OM89793<br>0 | ?                                                           | ?                                                                            | ? | Roychoudhury et al                                                                                                                                                                                                                                                                                                                                                          |
| hCoV-19/USA/UT-<br>UPHL-<br>220607768850/2022   | EPI_ISL_13166800     |              | Utah Public Health<br>Laboratory                            | Utah Public Health<br>Laboratory                                             |   | Erin L. Young, Kelly F.<br>Oakeson, Pooja Gupta,<br>John Arnn, Tom Iverson,<br>Olinto Linares-Perdomo                                                                                                                                                                                                                                                                       |
| hCoV-19/USA/UT-<br>UPHL-<br>220607177130/2022   | EPI_ISL_13166755     |              | Utah Public Health<br>Laboratory                            | Utah Public Health<br>Laboratory                                             |   | Erin L. Young, Kelly F.<br>Oakeson, Pooja Gupta,<br>John Arnn, Tom Iverson,<br>Olinto Linares-Perdomo                                                                                                                                                                                                                                                                       |
| hCoV-19/USA/UT-<br>UPHL-<br>220530512538/2022   | EPI_ISL_13057604     |              | Utah Public Health<br>Laboratory                            | Utah Public Health<br>Laboratory                                             |   | Erin L. Young, Kelly F.<br>Oakeson, Pooja Gupta,<br>John Arnn, Tom Iverson,<br>Olinto Linares-Perdomo                                                                                                                                                                                                                                                                       |
| USA/UT-UPHL-<br>220315872276/2022               | ?                    | ON051971     | Utah Public Health<br>Laboratory                            | Utah Public Health<br>Laboratory Infectious<br>Disease submission group      |   | Linares-Perdomo et al                                                                                                                                                                                                                                                                                                                                                       |
| USA/UT-UPHL-<br>210921010790/2021               | ?                    | OK254222     | Utah Public Health<br>Laboratory                            | Utah Public Health<br>Laboratory Infectious<br>Disease submission group      |   | Linares-Perdomo et al                                                                                                                                                                                                                                                                                                                                                       |
| USA/UT-UPHL-<br>210820369191/2021               | EPI_ISL_38<br>33172  | OK039691     | Utah Public Health<br>Laboratory                            | Utah Public Health<br>Laboratory Infectious<br>Disease submission group      |   | Linares et al                                                                                                                                                                                                                                                                                                                                                               |
| USA/UT-UPHL-<br>210721062026/2021               | ?                    | MZ647049     | Utah Public Health<br>Laboratory                            | Utah Public Health<br>Laboratory Infectious<br>Disease submission group      |   | Linares-Perdomo et al                                                                                                                                                                                                                                                                                                                                                       |
| USA/UT-UPHL-<br>2104536561/2020                 | EPI_ISL_24<br>96754  | MZ373660     | Utah Public Health<br>Laboratory                            | Utah Public Health<br>Laboratory Infectious<br>Disease submission group      |   | Gallagher et al                                                                                                                                                                                                                                                                                                                                                             |
| USA/UT-UPHL-<br>2104190675/2021                 | EPI_ISL_20<br>81706  | MZ189550     | Utah Public Health<br>Laboratory                            | Utah Public Health<br>Laboratory Infectious<br>Disease submission group      |   | Gallagher et al                                                                                                                                                                                                                                                                                                                                                             |
| USA/UT-CDC-<br>LC0016319/2021                   | EPI_ISL_11<br>51717  | MW70620<br>0 | ?                                                           | ?                                                                            | ? | Cook et al                                                                                                                                                                                                                                                                                                                                                                  |
| USA/TX-IHD-<br>2107131VI5991/2021               | EPI_ISL_29<br>63665  | MZ569173     | ?                                                           | ?                                                                            | ? | Penn et al                                                                                                                                                                                                                                                                                                                                                                  |
| USA/TX-DSHS-<br>3811/2020                       | ?                    | MW80922<br>1 | Texas Department of State<br>Health Services                | Texas Department of State<br>Health Services-SARS-CoV-<br>2 submission group |   | Pokharel et al                                                                                                                                                                                                                                                                                                                                                              |

|                                              |                  |          |                                           |                                                                                           |                                                                                                                                                                                                                                                                                                                                                                                                                                                              |
|----------------------------------------------|------------------|----------|-------------------------------------------|-------------------------------------------------------------------------------------------|--------------------------------------------------------------------------------------------------------------------------------------------------------------------------------------------------------------------------------------------------------------------------------------------------------------------------------------------------------------------------------------------------------------------------------------------------------------|
| <b>USA/TX-DSHS-0564/2020</b>                 | EPI_ISL_574466   | MW093479 | Texas Department of State Health Services | Texas Department of State Health Services-SARS-CoV-2 submission group                     | Tuladhar et al                                                                                                                                                                                                                                                                                                                                                                                                                                               |
| <b>USA/TX-CDC-STM-ZC2Q6VKJT/2022</b>         | ?                | ON718555 | 'Helix'                                   | CDC-OAMD                                                                                  | Howard et al                                                                                                                                                                                                                                                                                                                                                                                                                                                 |
| <b>USA/TX-CDC-STM-S5C5FQPH7/2022</b>         | ?                | ON899107 | 'Helix'                                   | CDC-OAMD                                                                                  | Howard et al                                                                                                                                                                                                                                                                                                                                                                                                                                                 |
| <b>hCoV-19/USA/TX-CDC-STM-HU4B4YA6Y/2022</b> | EPI_ISL_13191405 |          | Helix                                     | Centers for Disease Control and Prevention Division of Viral Diseases, Pathogen Discovery | Dakota Howard, Dhvani Batra, Peter Cook, Jason Caravas, Benjamin Rambo-Martin, Scott Sammons, Yvette Unoarumhi, Matthew Schmerer, Kristine Lacek, Tymeckia Kendall, Victoria Caban Figueroa, Helix CA, Shatavia Morrison, Christopher Gulvick, Erisa Sula, Clinton Paden, Duncan MacCannell                                                                                                                                                                  |
| <b>hCoV-19/USA/TX-CDC-STM-76E3V82K2/2022</b> | EPI_ISL_13423378 |          | Helix                                     | Centers for Disease Control and Prevention Division of Viral Diseases, Pathogen Discovery | Dakota Howard, Dhvani Batra, Peter Cook, Jason Caravas, Benjamin Rambo-Martin, Scott Sammons, Yvette Unoarumhi, Matthew Schmerer, Kristine Lacek, Tymeckia Kendall, Victoria Caban Figueroa, Helix CA, Shatavia Morrison, Christopher Gulvick, Erisa Sula, Clinton Paden, Duncan MacCannell                                                                                                                                                                  |
| <b>hCoV-19/USA/TX-CDC-QDX37100883/2022</b>   | EPI_ISL_1311604? |          | Quest Diagnostics Incorporated            | Centers for Disease Control and Prevention Division of Viral Diseases, Pathogen Discovery | Dakota Howard, Dhvani Batra, Peter Cook, Jason Caravas, Benjamin Rambo-Martin, Scott Sammons, Yvette Unoarumhi, Matthew Schmerer, Kristine Lacek, Tymeckia Kendall, Victoria Caban Figueroa, Shatavia Morrison, Christopher Gulvick, Erisa Sula, S. Rosenthal, A. Gerasimova, R. Kagan, B. Anderson, M. Hua, Y. Liu, L. Bernstein, K. Livingston, A. Perez, I. Shlyakhter, R. Rolando, R. Owen, P. Tanpaiboon, F. Lacbawan, Clinton Paden, Duncan MacCannell |
| <b>hCoV-19/USA/TX-CDC-QDX37100882/2022</b>   | EPI_ISL_13117114 |          | Quest Diagnostics Incorporated            | Centers for Disease Control and Prevention Division of Viral Diseases, Pathogen Discovery | Dakota Howard, Dhvani Batra, Peter Cook, Jason Caravas, Benjamin Rambo-Martin, Scott Sammons, Yvette Unoarumhi, Matthew Schmerer, Kristine Lacek, Tymeckia Kendall, Victoria Caban Figueroa, Shatavia Morrison, Christopher Gulvick, Erisa Sula, S. Rosenthal, A. Gerasimova, R. Kagan, B. Anderson, M. Hua, Y. Liu, L. Bernstein, K.                                                                                                                        |

Livingston, A. Perez, I. Silvakhter, R. Rolando, R. Owen, P. Tanpaiboon, F. Lacbawan, Clinton Paden, Duncan MacCannell

|                                   |                      |              |                                         |                                                                                           |                                                                                                                                                                                                                                                                                                                                                                                                                      |
|-----------------------------------|----------------------|--------------|-----------------------------------------|-------------------------------------------------------------------------------------------|----------------------------------------------------------------------------------------------------------------------------------------------------------------------------------------------------------------------------------------------------------------------------------------------------------------------------------------------------------------------------------------------------------------------|
| USA/TX-CDC-QDX25890825/2021       | EPI_ISL_43<br>68055  | OK249249     | ?                                       | ?                                                                                         | Howard et al                                                                                                                                                                                                                                                                                                                                                                                                         |
| USA/TX-CDC-QDX24603711/2021       | EPI_ISL_43<br>70309  | OK250592     | ?                                       | ?                                                                                         | Howard et al                                                                                                                                                                                                                                                                                                                                                                                                         |
| USA/TX-CDC-QDX23916643/2021       | EPI_ISL_19<br>06845  | MZ090520     | ?                                       | ?                                                                                         | Howard et al                                                                                                                                                                                                                                                                                                                                                                                                         |
| USA/TX-CDC-QDX22285247/2021       | EPI_ISL_12<br>20717  | MW72873<br>3 | ?                                       | ?                                                                                         | Cook et al                                                                                                                                                                                                                                                                                                                                                                                                           |
| USA/TX-CDC-LC0105515/2021         | EPI_ISL_34<br>30808  | MZ743656     | Laboratory Corporation of America       | CDC-OAMD                                                                                  | Howard et al                                                                                                                                                                                                                                                                                                                                                                                                         |
| USA/TX-CDC-LC0097101/2021         | EPI_ISL_31<br>13239  | MZ850683     | Laboratory Corporation of America       | CDC-OAMD                                                                                  | Howard et al                                                                                                                                                                                                                                                                                                                                                                                                         |
| USA/TX-CDC-LC0073732/2021         | EPI_ISL_43<br>81556  | OK234786     | ?                                       | ?                                                                                         | Howard et al                                                                                                                                                                                                                                                                                                                                                                                                         |
| USA/TX-CDC-ASC210209149/2021      | EPI_ISL_38<br>20902  | OK014715     | ?                                       | ?                                                                                         | Howard et al                                                                                                                                                                                                                                                                                                                                                                                                         |
| USA/TX-CDC-2-6050958/2022         | ?                    | ON926267     | TX-Houston Health Department Laboratory | CDC DVD Genomics and Discovery Team                                                       | Sheth et al                                                                                                                                                                                                                                                                                                                                                                                                          |
| USA/TN-CDC-ASC210736786/2022      | EPI_ISL_11<br>491122 | ON080515     | Aegis Sciences Corporation              | CDC-OAMD                                                                                  | Howard et al                                                                                                                                                                                                                                                                                                                                                                                                         |
| USA/TN-CDC-ASC210315284/2021      | EPI_ISL_60<br>68505  | OL398577     | ?                                       | ?                                                                                         | Howard et al                                                                                                                                                                                                                                                                                                                                                                                                         |
| USA/TN-CDC-ASC210187911/2021      | EPI_ISL_38<br>63098  | OK010718     | ?                                       | ?                                                                                         | Howard et al                                                                                                                                                                                                                                                                                                                                                                                                         |
| USA/TN-CDC-ASC210016026/2021      | EPI_ISL_15<br>13430  | MW89184<br>0 | ?                                       | ?                                                                                         | Howard et al                                                                                                                                                                                                                                                                                                                                                                                                         |
| USA/TG935688/2020                 | EPI_ISL_27<br>69301  | MZ917542     | Sonora Quest Laboratories - Phoenix     | The Translational Genomics Research Institute COVID submission group                      | Bowers et al                                                                                                                                                                                                                                                                                                                                                                                                         |
| USA/SC-COVID21-1563/2021          | EPI_ISL_23<br>13023  | MZ264360     | ?                                       | ?                                                                                         | Freeman et al                                                                                                                                                                                                                                                                                                                                                                                                        |
| USA/RI-CDCBI-RIDOH_00573/2021     | EPI_ISL_14<br>07362  | MW83475<br>4 | Rhode Island Department of Health       | Broad Institute Genomic Center for Infectious Diseases                                    | Lemieux et al                                                                                                                                                                                                                                                                                                                                                                                                        |
| USA/RI-CDC-2-4462205/2021         | EPI_ISL_26<br>45361  | MZ429169     | ?                                       | ?                                                                                         | Sheth et al                                                                                                                                                                                                                                                                                                                                                                                                          |
| USA/PA-CDC-STM-000053943/2021     | EPI_ISL_18<br>04343  | MZ061111     | ?                                       | ?                                                                                         | Howard et al                                                                                                                                                                                                                                                                                                                                                                                                         |
| USA/PA-CDC-QDX36964190/2022       | ?                    | ON636708     | Quest Diagnostics Incorporated          | CDC-OAMD                                                                                  | Howard et al                                                                                                                                                                                                                                                                                                                                                                                                         |
| hCoV-19/USA/OR-CDC-LC0748314/2022 | EPI_ISL_13808012     |              | Laboratory Corporation of America       | Centers for Disease Control and Prevention Division of Viral Diseases, Pathogen Discovery | Dakota Howard, Dhvani Batra, Peter Cook, Jason Caravas, Benjamin Rambo-Martin, Scott Sammons, Yvette Unoarumhi, Matthew Schmerer, Kristine Lacek, Tymeckia Kendall, Victoria Caban Figueroa, Shatavia Morrison, Christopher Gulvick, Minoo Agarwal, Eyad Almasri, Debbie Boles, Ayla Burns, Nuthawin Charoensri, Oren Cohen, Susan Countryman, Mary Cristobal, Bobbi Croy, Suzanne Dale, Hrushikesh Deshmukh, Amanda |

|                                                       |                  |                                      |                                                                                                    |                                                                                                                                                                                                                                                                                                                                                                                                                                                                                                                                                                                                                                                                                                                                                    |
|-------------------------------------------------------|------------------|--------------------------------------|----------------------------------------------------------------------------------------------------|----------------------------------------------------------------------------------------------------------------------------------------------------------------------------------------------------------------------------------------------------------------------------------------------------------------------------------------------------------------------------------------------------------------------------------------------------------------------------------------------------------------------------------------------------------------------------------------------------------------------------------------------------------------------------------------------------------------------------------------------------|
|                                                       |                  |                                      |                                                                                                    | Douglas, Vincent<br>Drouillon, Marcia<br>Eisenberg, Howard Engler,<br>Rama Gharti, Prashant<br>Gupta, Susan Hicks, Jake<br>Humphrey, Lax Iyer, Lisa<br>Piefferle, Manoj Jain,<br>Matthew Robinson,<br>Mohan Kolli, Brian<br>Krueger, Tim Kuphal,<br>Stanley Letovsky, Michael<br>Levandoski, Craig Lukasik,<br>Jonathan Meltzer, Brian<br>Norvell, Mindy Nye, Scott<br>Parker, Christos<br>Petropoulos, John Pruitt,<br>Steven Ragan, Scott Ryan,<br>Mike Sapeta, Jana<br>Schroth, Suresh Selvaraju,<br>Goran Stevovic, Amanda<br>Suchanek, Andrea Throop,<br>Lyndon Tilson, Thomas<br>Urban, Joe Voshell,<br>Kimberly Wagner,<br>Jonathan Williams, Mary<br>Williamson, Qian Zeng,<br>Tricia Zwiefelhofer, Clinton<br>Paden, Duncan<br>MacCannell |
| <b>hCoV-19/USA/NY-<br/>PRL-<br/>220617_02E19/2022</b> | EPI_ISL_13480419 | Pandemic Response Lab -<br>NYC       | Pandemic Response Lab,<br>R&D                                                                      | Isabel Fernandez Escapa,<br>Michael Hammerling,<br>Melissa Hopkins, Cybill del<br>Castillo, William Ward,<br>Steven Chase, Simran<br>Chhabria, Sol Rey, Alex<br>Carpio, Simran Gupta,<br>Tiara Rivera, Haiping Hao,<br>Jon Laurent                                                                                                                                                                                                                                                                                                                                                                                                                                                                                                                 |
| <b>hCoV-19/USA/NY-<br/>PRL-<br/>220516_01C10/2022</b> | EPI_ISL_12857036 | Pandemic Response Lab -<br>NYC       | Pandemic Response Lab,<br>R&D                                                                      | Isabel Fernandez Escapa,<br>Michael Hammerling,<br>Melissa Hopkins, Cybill del<br>Castillo, William Ward,<br>Steven Chase, Simran<br>Chhabria, Sol Rey, Alex<br>Carpio, Simran Gupta,<br>Tiara Rivera, Haiping Hao,<br>Jon Laurent                                                                                                                                                                                                                                                                                                                                                                                                                                                                                                                 |
| <b>hCoV-19/USA/NY-<br/>NYCPHL-012964/2022</b>         | EPI_ISL_13263634 | DOHMH PHL                            | New York City Public<br>Health Laboratory                                                          | Jade Wang, et al.                                                                                                                                                                                                                                                                                                                                                                                                                                                                                                                                                                                                                                                                                                                                  |
| <b>USA/NY-CDC-STM-<br/>B8FZA7WCA/2022</b>             | ?                | ON991467                             | ?                                                                                                  | Howard et al                                                                                                                                                                                                                                                                                                                                                                                                                                                                                                                                                                                                                                                                                                                                       |
| <b>USA/NY-CDC-<br/>LC0755132/2022</b>                 | ?                | ON977:80                             | Laboratory Corporation of<br>America                                                               | CDC-OAMD<br>Howard et al                                                                                                                                                                                                                                                                                                                                                                                                                                                                                                                                                                                                                                                                                                                           |
| <b>hCoV-19/USA/NY-<br/>CDC-LC0742959/2022</b>         | EPI_ISL_13780329 | Laboratory Corporation of<br>America | Centers for Disease<br>Control and Prevention<br>Division of Viral Diseases,<br>Pathogen Discovery | Dakota Howard, Dhvani<br>Batra, Peter Cook, Jason<br>Caravas, Benjamin<br>Rambo-Martin, Scott<br>Sammons, Yvette<br>Unoarumhi, Matthew<br>Schmerer, Kristine Lacek,<br>Tymeckia Kendall, Victoria<br>Caban Figueroa, Shatavia<br>Morrison, Christopher<br>Gulvick, Minoo Agarwal,<br>Eyad Almasri, Debbie<br>Boles, Ayla Burns,                                                                                                                                                                                                                                                                                                                                                                                                                    |



Nutnawin Charoensri,  
 Oren Cohen, Susan  
 Countryman, Mary  
 Cristobal, Bobbi Croy,  
 Suzanne Dale, Hirushikesri  
 Deshmukh, Amanda  
 Douglas, Vincent  
 Drouillon, Marcia  
 Eisenberg, Howard Engler,  
 Rama Ghatti, Prashant  
 Gupta, Susan Hicks, Jake  
 Humphrey, Lax Iyer, Lisa  
 Pietterle, Manoj Jain,  
 Matthew Robinson  
 Mohan Kolli, Brian  
 Krueger, Tim Kuphal,  
 Stanley Letovsky, Michael  
 Levandoski, Craig Lukasik,  
 Jonathan Meltzer, Brian  
 Norvell, Mindy Nye, Scott  
 Parker, Christos  
 Pteropoulos, John Pruitt,  
 Steven Ragan, Scott Ryan,  
 Mike Sapeta, Jana  
 Schroth, Suresh Selvaraju,  
 Goran Stevovic, Amanda  
 Suchanek, Andrea Throop,  
 Lyndon Tilson, Thomas  
 Urban, Joe Voshell,  
 Kimberly Wagner,  
 Jonathan Williams, Mary  
 Williamson, Qian Zeng,  
 Tricia Zwiefelhofer, Clinton  
 Paden, Duncan  
 MacCannell

|                                                         |                      |              |                                      |                                                                                                    |                                                                                                                                                                                                                                                                                                                                 |
|---------------------------------------------------------|----------------------|--------------|--------------------------------------|----------------------------------------------------------------------------------------------------|---------------------------------------------------------------------------------------------------------------------------------------------------------------------------------------------------------------------------------------------------------------------------------------------------------------------------------|
| <b>USA/NY-CDC-<br/>LC0564597/2022</b>                   | EPI_ISL_11<br>528948 | ON091212     | Laboratory Corporation of<br>America | CDC-OAMD                                                                                           | Howard et al                                                                                                                                                                                                                                                                                                                    |
| <b>USA/NY-CDC-<br/>LC0178784/2021</b>                   | EPI_ISL_37<br>46993  | MZ989578     | ?                                    | ?                                                                                                  | Howard et al                                                                                                                                                                                                                                                                                                                    |
| <b>USA/NY-CDC-2-<br/>4282720/2021</b>                   | EPI_ISL_19<br>37606  | MZ143754     | ?                                    | ?                                                                                                  | Sheth et al                                                                                                                                                                                                                                                                                                                     |
| <b>hCoV-19/USA/NV-<br/>CDC-STM-<br/>SYZPFZGBF/2022</b>  | EPI_ISL_13425806     |              | Helix                                | Centers for Disease<br>Control and Prevention<br>Division of Viral Diseases,<br>Pathogen Discovery | Dakota Howard, Dhvani<br>Batra, Peter Cook, Jason<br>Caravas, Benjamin<br>Rambo-Martin, Scott<br>Sammons, Yvette<br>Unoarumhi, Matthew<br>Schmerer, Kristine Lacek,<br>Tymeckia Kendall, Victoria<br>Caban Figueroa, Helix CA,<br>Shatavia Morrison,<br>Christopher Gulvick, Erisa<br>Sula, Clinton Paden,<br>Duncan MacCannell |
| <b>USA/NV-CDC-FG-<br/>251036/2022</b>                   | EPI_ISL_99<br>41286  | OM65222<br>9 | Fulgent Genetics                     | CDC-OAMD                                                                                           | Howard et al                                                                                                                                                                                                                                                                                                                    |
| <b>USA/NV-CDC-<br/>ASC210156628/2021</b>                | EPI_ISL_33<br>22135  | MZ745067     | Aegis Sciences<br>Corporation        | CDC-OAMD                                                                                           | Howard et al                                                                                                                                                                                                                                                                                                                    |
| <b>USA/NM-UNM-<br/>TC222423/2020</b>                    | EPI_ISL_10<br>18314  | OL706939     | TriCore Reference<br>Laboratories    | The University of New<br>Mexico Health Sciences<br>Center                                          | Domman et al                                                                                                                                                                                                                                                                                                                    |
| <b>USA/NM-CDC-<br/>ASC210127022/2021</b>                | EPI_ISL_16<br>87865  | MZ024295     | ?                                    | ?                                                                                                  | Howard et al                                                                                                                                                                                                                                                                                                                    |
| <b>hCoV-19/USA/NJ-<br/>CDC-STM-<br/>GNM17CSAMM/2022</b> | EPI_ISL_13259144     |              | Helix                                | Centers for Disease<br>Control and Prevention                                                      | Dakota Howard, Dhvani<br>Batra, Peter Cook, Jason<br>Caravas, Benjamin                                                                                                                                                                                                                                                          |

|                                                        |                  |                                      |                                                                                                    |                                                                                                                                                                                                                                                                                                                                                                                                                                                                                                                                                                                                                                                                                                                                                                                                                                                                                                                                                                                                                                                                                                                                         |
|--------------------------------------------------------|------------------|--------------------------------------|----------------------------------------------------------------------------------------------------|-----------------------------------------------------------------------------------------------------------------------------------------------------------------------------------------------------------------------------------------------------------------------------------------------------------------------------------------------------------------------------------------------------------------------------------------------------------------------------------------------------------------------------------------------------------------------------------------------------------------------------------------------------------------------------------------------------------------------------------------------------------------------------------------------------------------------------------------------------------------------------------------------------------------------------------------------------------------------------------------------------------------------------------------------------------------------------------------------------------------------------------------|
|                                                        |                  |                                      | Division of Viral Diseases,<br>Pathogen Discovery                                                  | Rambo-Martin, Scott<br>Sammons, Yvette<br>Unoarumhi, Matthew<br>Schmerer, Kristine Lacek,<br>Tymeckia Kendall, Victoria<br>Caban Figueroa, Helix CA,<br>Shatavia Morrison,<br>Christopher Gulvick, Erisa<br>Sula, Clinton Paden,<br>Duncan MacCannell                                                                                                                                                                                                                                                                                                                                                                                                                                                                                                                                                                                                                                                                                                                                                                                                                                                                                   |
| <b>hCoV-19/USA/NJ-<br/>CDC-STM-<br/>9UPKQ2WEC/2022</b> | EPI_ISL_13505734 | Helix                                | Centers for Disease<br>Control and Prevention<br>Division of Viral Diseases,<br>Pathogen Discovery | Dakota Howard, Dhwani<br>Batra, Peter Cook, Jason<br>Caravas, Benjamin<br>Rambo-Martin, Scott<br>Sammons, Yvette<br>Unoarumhi, Matthew<br>Schmerer, Kristine Lacek,<br>Tymeckia Kendall, Victoria<br>Caban Figueroa, Helix CA,<br>Shatavia Morrison,<br>Christopher Gulvick, Erisa<br>Sula, Clinton Paden,<br>Duncan MacCannell                                                                                                                                                                                                                                                                                                                                                                                                                                                                                                                                                                                                                                                                                                                                                                                                         |
| <b>hCoV-19/USA/NJ-<br/>CDC-LC0703516/2022</b>          | EPI_ISL_13550894 | Laboratory Corporation of<br>America | Centers for Disease<br>Control and Prevention<br>Division of Viral Diseases,<br>Pathogen Discovery | Dakota Howard, Dhwani<br>Batra, Peter Cook, Jason<br>Caravas, Benjamin<br>Rambo-Martin, Scott<br>Sammons, Yvette<br>Unoarumhi, Matthew<br>Schmerer, Kristine Lacek,<br>Tymeckia Kendall, Victoria<br>Caban Figueroa, Shatavia<br>Morrison, Christopher<br>Gulvick, Minoo Agarwal,<br>Eyad Almasri, Debbie<br>Boles, Ayla Burns,<br>Nuthawin Charoensri,<br>Oren Cohen, Susan<br>Countryman, Mary<br>Cristobal, Bobbi Croy,<br>Suzanne Dale, Hrushikesh<br>Deshmukh, Amanda<br>Douglas, Vincent<br>Drouillon, Marcia<br>Eisenberg, Howard Engler,<br>Rama Ghatti, Prashant<br>Gupta, Susan Hicks, Jake<br>Humphrey, Lax Iyer, Lisa<br>Pfefferle, Manoj Jain,<br>Matthew Robinson,<br>Mohan Kolli, Brian<br>Krueger, Tim Kuphal,<br>Stanley Letovsky, Michael<br>Levandoski, Craig Lukasik,<br>Jonathan Meltzer, Brian<br>Norvell, Mindy Nye, Scott<br>Parker, Christos<br>Petropoulos, John Pruitt,<br>Steven Ragan, Scott Ryan,<br>Mike Sapeta, Jana<br>Schroth, Suresh Selvaraju,<br>Goran Stevovic, Amanda<br>Suchanek, Andrea Throop,<br>Lyndon Tilson, Thomas<br>Urban, Joe Voshell,<br>Kimberly Wagner,<br>Jonathan Williams, Mary |

|                                     |                  |          |                                   |                                                                                           |  |                                                                                                                                                                                                                                                                                                                                                                                                                                                              |
|-------------------------------------|------------------|----------|-----------------------------------|-------------------------------------------------------------------------------------------|--|--------------------------------------------------------------------------------------------------------------------------------------------------------------------------------------------------------------------------------------------------------------------------------------------------------------------------------------------------------------------------------------------------------------------------------------------------------------|
|                                     |                  |          |                                   |                                                                                           |  | Williamson, Qian Zeng, Ticia Zwiefelhofer, Clinton Paden, Duncan MacCannell                                                                                                                                                                                                                                                                                                                                                                                  |
| USA/NJ-CDC-LC0593886/2022           | EPI_ISL_12595024 | ON450672 | Laboratory Corporation of America | CDC-OAMD                                                                                  |  | Howard et al                                                                                                                                                                                                                                                                                                                                                                                                                                                 |
| USA/NJ-CDC-LC0042358/2021           | EPI_ISL_1683316  | MZ038106 | ?                                 | ?                                                                                         |  | Howard et al                                                                                                                                                                                                                                                                                                                                                                                                                                                 |
| USA/NJ-CDC-LC0009660/2021           | EPI_ISL_1031416  | MW641464 | ?                                 | ?                                                                                         |  | Cook et al                                                                                                                                                                                                                                                                                                                                                                                                                                                   |
| USA/NJ-CDC-ASC210593373/2022        | EPI_ISL_9527338  | OM517680 | Aegis Sciences Corporation        | CDC-OAMD                                                                                  |  | Howard et al                                                                                                                                                                                                                                                                                                                                                                                                                                                 |
| USA/NJ-CDC-ASC210020462/2021        | EPI_ISL_1650310  | MW968630 | ?                                 | ?                                                                                         |  | Howard et al                                                                                                                                                                                                                                                                                                                                                                                                                                                 |
| USA/NC-CDC-STM-000047276/2021       | EPI_ISL_1690318  | MZ006286 | ?                                 | ?                                                                                         |  | Howard et al                                                                                                                                                                                                                                                                                                                                                                                                                                                 |
| hCoV-19/USA/NC-CDC-QDX36866549/2022 | EPI_ISL_13063848 |          | Quest Diagnostics Incorporated    | Centers for Disease Control and Prevention Division of Viral Diseases, Pathogen Discovery |  | Dakota Howard, Dhvani Batra, Peter Cook, Jason Caravas, Benjamin Rambo-Martin, Scott Sammons, Yvette Unoarumhi, Matthew Schmerer, Kristine Lacek, Tymeckia Kendall, Victoria Caban Figueroa, Shatavia Morrison, Christopher Gulvick, Erisa Sula, S. Rosenthal, A. Gerasimova, R. Kagan, B. Anderson, M. Hua, Y. Liu, L. Bernstein, K. Livingston, A. Perez, I. Shlyakhter, R. Rolando, R. Owen, P. Tanpaiboon, F. Lacbawan, Clinton Paden, Duncan MacCannell |
| hCoV-19/USA/NC-CDC-QDX36219208/2022 | EPI_ISL_12640530 |          | Quest Diagnostics Incorporated    | Centers for Disease Control and Prevention Division of Viral Diseases, Pathogen Discovery |  | Dakota Howard, Dhvani Batra, Peter Cook, Jason Caravas, Benjamin Rambo-Martin, Scott Sammons, Yvette Unoarumhi, Matthew Schmerer, Kristine Lacek, Tymeckia Kendall, Victoria Caban Figueroa, Shatavia Morrison, Christopher Gulvick, Erisa Sula, S. Rosenthal, A. Gerasimova, R. Kagan, B. Anderson, M. Hua, Y. Liu, L. Bernstein, K. Livingston, A. Perez, I. Shlyakhter, R. Rolando, R. Owen, P. Tanpaiboon, F. Lacbawan, Clinton Paden, Duncan MacCannell |
| USA/NC-CDC-QDX25890699/2021         | EPI_ISL_4373603  | OK252743 | ?                                 | ?                                                                                         |  | Howard et al                                                                                                                                                                                                                                                                                                                                                                                                                                                 |
| USA/NC-CDC-LC0729057/2022           | ?                | ON918145 | Laboratory Corporation of America | CDC-OAMD                                                                                  |  | Howard et al                                                                                                                                                                                                                                                                                                                                                                                                                                                 |
| USA/NC-CDC-LC0657054/2022           | ?                | ON659280 | Laboratory Corporation of America | CDC-OAMD                                                                                  |  | Howard et al                                                                                                                                                                                                                                                                                                                                                                                                                                                 |
| hCoV-19/USA/NC-CDC-LC0615385/2022   | EPI_ISL_12764039 |          | Laboratory Corporation of America | Centers for Disease Control and Prevention Division of Viral Diseases, Pathogen Discovery |  | Dakota Howard, Dhvani Batra, Peter Cook, Jason Caravas, Benjamin Rambo-Martin, Scott Sammons, Yvette Unoarumhi, Matthew                                                                                                                                                                                                                                                                                                                                      |

Schmerer, Kristine Lacek,  
 Tymeckia Kendall, Victoria  
 Cuban Figueroa, Shatavia  
 Morrison, Christopher  
 Gulvick, Minoo Agarwal,  
 Eyad Almasri, Debbie  
 Bules, Ayla Burns,  
 Nuthawin Charoensri,  
 Oren Cohen, Susan  
 Countryman, Mary  
 Cristobal, Bobbi Croy,  
 Suzanne Dale, Hrushikesh  
 Desnmukh, Amanda  
 Douglas, Vincent  
 Drouillon, Marcia  
 Eisenberg, Howard Engler,  
 Rama Ghatti, Prashant  
 Gupta, Susan Hicks, Jake  
 Humphrey, Lax Iyer, Lisa  
 Pfferene, Manoj Jain,  
 Matthew Robinson,  
 Mohan Kolli, Brian  
 Krueger, Tim Kuphal,  
 Stanley Letovsky, Michael  
 Levandoski, Craig Lukasik,  
 Jonathan Meltzer, Brian  
 Norvell, Mindy Nye, Scott  
 Parker, Christos  
 Petropoulos, John Pruitt,  
 Steven Ragan, Scott Ryan,  
 Mike Sapeta, Jana  
 Schroth, Suresh Selvaraju,  
 Goran Stevovic, Amanda  
 Suchanek, Andrea Throop,  
 Lyndon Tilson, Thomas  
 Urban, Joe Voshell,  
 Kimberly Wagner,  
 Jonathan Williams, Mary  
 Williamson, Qian Zeng,  
 Tricia Zwiefelhofer, Clinton  
 Paden, Duncan  
 MacCannell

|                                               |                      |              |                                                        |                                                        |                                                   |
|-----------------------------------------------|----------------------|--------------|--------------------------------------------------------|--------------------------------------------------------|---------------------------------------------------|
| <b>USA/NC-CDC-<br/>LC0598456/2022</b>         | EPI_ISL_12<br>622384 | ON468091     | Laboratory Corporation of<br>America                   | CDC-OAMD                                               | Howard et al                                      |
| <b>USA/NC-CDC-<br/>LC0072832/2021</b>         | EPI_ISL_43<br>81982  | OK235008     | ?                                                      | ?                                                      | Howard et al                                      |
| <b>USA/MS-CDC-<br/>ASC210002921/2021</b>      | EPI_ISL_22<br>43568  | MZ260175     | ?                                                      | ?                                                      | Howard et al                                      |
| <b>USA/MN-MDH-<br/>4218/2021</b>              | EPI_ISL_13<br>72464  | MW22185<br>8 | ?                                                      | ?                                                      | Lorentz et al                                     |
| <b>USA/MN-MDH-<br/>26542/2022</b>             | ?                    | ON802103     | ?                                                      | ?                                                      | Garfin et al                                      |
| <b>USA/MN-CDC-<br/>QDX24799521/2021</b>       | EPI_ISL_43<br>71392  | OK251226     | ?                                                      | ?                                                      | Howard et al                                      |
| <b>USA/MN-CDC-<br/>QDX13083423/2021</b>       | EPI_ISL_49<br>54947  | OK421063     | ?                                                      | ?                                                      | Howard et al                                      |
| <b>USA/MI-MDHS-<br/>SC41641/2022</b>          | EPI_ISL_13<br>718529 | ON951934     | Michigan Department of<br>Health and Human<br>Services | Michigan Department of<br>Health and Human<br>Services | Blankenship et al                                 |
| <b>USA/MI-CDC-<br/>QDX37556917/2022</b>       | ?                    | ON795484     | Quest Diagnostics<br>Incorporated                      | CDC-OAMD                                               | Howard et al                                      |
| <b>USA/MI-CDC-<br/>QDX22721848/2021</b>       | EPI_ISL_12<br>97786  | MW78303<br>6 | ?                                                      | ?                                                      | Cook et al                                        |
| <b>hCoV-19/USA/MI-<br/>CDC-LC0648031/2022</b> | EPI_ISL_13149814     |              | Laboratory Corporation of<br>America                   | Centers for Disease<br>Control and Prevention          | Dakota Howard, Dhvani<br>Batra, Peter Cook, Jason |

Division of Viral Diseases,  
Pathogen Discovery

Caravas, Benjamin  
Rambo-Martin, Scott  
Sammons, Yvette  
Inoaramhi, Matthew  
Schmerer, Kristine Lacek,  
Tymeckia Kendall, Victoria  
Caban Figueroa, Shatavia  
Morrison, Christopher  
Gulvick, Minoo Agarwal,  
Eyad Almasri, Debbie  
Boies, Ayla Burns,  
Nuthawin Charoensri,  
Oren Cohen, Susan  
Countryman, Mary  
Cristobal, Bobbi Croy,  
Suzanne Dale, Hrushikesh  
Deshmukh, Amanda  
Douglas, Vincent  
Drouillon, Marcia  
Eisenberg, Howard Engler,  
Rama Ghatti, Prashant  
Gupta, Susan Hicks, Jake  
Humphrey, Lax Iyer, Lisa  
Pfefferle, Manoj Jain,  
Matthew Robinson,  
Mohan Kolli, Brian  
Krueger, Tim Kuphal,  
Stanley Letovsky, Michael  
Levandoski, Craig Lukasik,  
Jonathan Meltzer, Brian  
Norvell, Mindy Nye, Scott  
Parker, Christos  
Petropoulos, John Pruitt,  
Steven Ragan, Scott Ryan,  
Mike Sapeta, Jana  
Schroth, Suresh Selvaraju,  
Goran Stevovic, Amanda  
Suchanek, Andrea Throop,  
Lyndon Tilson, Thomas  
Urban, Joe Voshell,  
Kimberly Wagner,  
Jonathan Williams, Mary  
Williamson, Qian Zeng,  
Tricia Zwiefelhofer, Clinton  
Paden, Duncan  
MacCannell

|                                                 |                     |              |                                                             |                                                              |               |
|-------------------------------------------------|---------------------|--------------|-------------------------------------------------------------|--------------------------------------------------------------|---------------|
| USA/MD-CDC-<br>QDX37909401/2022                 | ?                   | JN868067     | Quest Diagnostics<br>Incorporated                           | CDC-OAMD                                                     | Howard et al  |
| USA/MA-<br>UMASSMED-<br>P001D09/2020            | EPI_ISL_34<br>09221 | OM48498<br>2 | ?                                                           | ?                                                            | Ward et al    |
| USA/MA-CDCBI-<br>CRSP_VGKPGOKW5D<br>NR2NZE/2021 | EPI_ISL_19<br>71928 | MZ149733     | Broad Institute Clinical<br>Research Sequencing<br>Platform | Broad Institute Genomic<br>Center for Infectious<br>Diseases | Lemieux et al |
| USA/MA-CDCBI-<br>CRSP_U3XH7CM4QLA<br>NR3VF/2022 | ?                   | ON722983     | Broad Institute Clinical<br>Research Sequencing<br>Platform | Broad Institute Genomic<br>Center for Infectious<br>Diseases | Lemieux et al |
| USA/MA-CDCBI-<br>CRSP_M62XFEVCXVN<br>MMVII/2021 | EPI_ISL_19<br>68238 | MZ145690     | Broad Institute Clinical<br>Research Sequencing<br>Platform | Broad Institute Genomic<br>Center for Infectious<br>Diseases | Lemieux et al |
| USA/MA-CDCBI-<br>CRSP_G2.SENC65LOU<br>ORDS/2022 | EPI_ISL_92<br>38523 | OM42632<br>7 | Broad Institute Clinical<br>Research Sequencing<br>Platform | Broad Institute Genomic<br>Center for Infectious<br>Diseases | Lemieux et al |
| USA/MA-CDCBI-<br>CRSP_CJHVH6PRWRQ<br>HC027/2021 | EPI_ISL_52<br>51134 | OK535633     | Broad Institute Clinical<br>Research Sequencing<br>Platform | Broad Institute Genomic<br>Center for Infectious<br>Diseases | Lemieux et al |

|                                          |                      |              |                                                       |                                                                                           |                                                                                                                                                                                                                                                                                                                                                                                                                                                                                                                                                                                                                                                                                                                        |
|------------------------------------------|----------------------|--------------|-------------------------------------------------------|-------------------------------------------------------------------------------------------|------------------------------------------------------------------------------------------------------------------------------------------------------------------------------------------------------------------------------------------------------------------------------------------------------------------------------------------------------------------------------------------------------------------------------------------------------------------------------------------------------------------------------------------------------------------------------------------------------------------------------------------------------------------------------------------------------------------------|
| USA/MA-CDC-QDX25316405/2021              | EPI_ISL_24<br>63009  | MZ360019     | ?                                                     | ?                                                                                         | Howard et al                                                                                                                                                                                                                                                                                                                                                                                                                                                                                                                                                                                                                                                                                                           |
| USA/MA-Broad-CRSP_LWATPBO4SZN3 EU77/2022 | EPI_ISL_12<br>509250 | ON413319     | Broad Institute Clinical Research Sequencing Platform | Broad Institute Genomic Center for Infectious Diseases                                    | Lemieux et al                                                                                                                                                                                                                                                                                                                                                                                                                                                                                                                                                                                                                                                                                                          |
| USA/LA-CDC-STM-5FSBRAXFA/2022            | ?                    | ON892460     | 'Helix'                                               | CDC-OAMD                                                                                  | Howard et al                                                                                                                                                                                                                                                                                                                                                                                                                                                                                                                                                                                                                                                                                                           |
| USA/KY-CDC-LC0757491/2022                | ?                    | OP000167     | ?                                                     | ?                                                                                         | Howard et al                                                                                                                                                                                                                                                                                                                                                                                                                                                                                                                                                                                                                                                                                                           |
| USA/KY-CDC-LC0031802/2021                | EPI_ISL_15<br>13682  | MW90194<br>1 | ?                                                     | ?                                                                                         | Howard et al                                                                                                                                                                                                                                                                                                                                                                                                                                                                                                                                                                                                                                                                                                           |
| USA/KS-CDC-LC0008643/2021                | EPI_ISL_10<br>31804  | MW64115<br>9 | ?                                                     | ?                                                                                         | Cook et al                                                                                                                                                                                                                                                                                                                                                                                                                                                                                                                                                                                                                                                                                                             |
| hCoV-19/USA/IN-CDC-STM-Z82YC342P/2022    | EPI_ISL_13306540     |              | Helix                                                 | Centers for Disease Control and Prevention Division of Viral Diseases, Pathogen Discovery | Dakota Howard, Dhvani Batra, Peter Cook, Jason Caravas, Benjamin Rambo-Martin, Scott Sammons, Yvette Unoarumhi, Matthew Scherer, Kristine Lacek, Tymeckia Kendall, Victoria Caban Figueroa, Helix CA, Shatavia Morrison, Christopher Gulvick, Erisa Sula, Clinton Paden, Duncan MacCannell                                                                                                                                                                                                                                                                                                                                                                                                                             |
| USA/IN-CDC-LC0072801/2021                | EPI_ISL_43<br>81071  | OK234522     | ?                                                     | ?                                                                                         | Howard et al                                                                                                                                                                                                                                                                                                                                                                                                                                                                                                                                                                                                                                                                                                           |
| USA/IL-UW-149/2020                       | EPI_ISL_42<br>7456   | MT706277     | UWHC                                                  | UW Madison                                                                                | Moreno et al                                                                                                                                                                                                                                                                                                                                                                                                                                                                                                                                                                                                                                                                                                           |
| USA/IL-CDC-STM-MARERTJFC/2022            | ?                    | ON958904     | 'Helix'                                               | CDC-OAMD                                                                                  | Howard et al                                                                                                                                                                                                                                                                                                                                                                                                                                                                                                                                                                                                                                                                                                           |
| USA/IL-CDC-QDX37980271/2022              | ?                    | ON905743     | Quest Diagnostics Incorporated                        | CDC-OAMD                                                                                  | Howard et al                                                                                                                                                                                                                                                                                                                                                                                                                                                                                                                                                                                                                                                                                                           |
| hCoV-19/USA/IL-CDC-LC0731760/2022        | EPI_ISL_13645228     |              | Laboratory Corporation of America                     | Centers for Disease Control and Prevention Division of Viral Diseases, Pathogen Discovery | Dakota Howard, Dhvani Batra, Peter Cook, Jason Caravas, Benjamin Rambo-Martin, Scott Sammons, Yvette Unoarumhi, Matthew Scherer, Kristine Lacek, Tymeckia Kendall, Victoria Caban Figueroa, Shatavia Morrison, Christopher Gulvick, Minoo Agarwal, Eyad Almasri, Debbie Boles, Ayla Burns, Nuthawin Charoensri, Oren Cohen, Susan Countryman, Mary Cristobal, Bobbi Croy, Suzanne Dale, Hrushikesh Deshmukh, Amanda Douglas, Vincent Drouillon, Marcia Eisenberg, Howard Engler, Rama Ghatti, Prashant Gupta, Susan Hicks, Jake Humphrey, Lax Iyer, Lisa Pfefferle, Manoj Jain, Matthew Robinson, Mohan Kolli, Brian Krueger, Tim Kuphal, Stanley Letovsky, Michael Levandoski, Craig Lukasik, Jonathan Meltzer, Brian |

|                                       |                  |          |                                   |  |                                                                                           |                                                                                                                                                                                                                                                                                                                                                            |
|---------------------------------------|------------------|----------|-----------------------------------|--|-------------------------------------------------------------------------------------------|------------------------------------------------------------------------------------------------------------------------------------------------------------------------------------------------------------------------------------------------------------------------------------------------------------------------------------------------------------|
|                                       |                  |          |                                   |  |                                                                                           | Novell, Mindy Nye, Scott Parker, Christos Petropoulos, John Pruitt, Steven Ragan, Scott Ryan, Mike Sapeta, Jana Schroth, Suresh Selvaraju, Goran Stevovic, Amanda Suchanek, Andrea Throop, Lyndon Tilson, Thomas Urban, Joe Voshell, Kimberly Wagner, Jonathan Williams, Mary Williamson, Qian Zeng, Tricia Zwiefelhofer, Clinton Paden, Duncan MacCannell |
| USA/IL-CDC-ASC210568836/2021          | EPI_ISL_8555468  | OM198441 | Aegis Sciences Corporation        |  | CDC-OAMD                                                                                  | Howard et al                                                                                                                                                                                                                                                                                                                                               |
| USA/IL-CDC-ASC210017080/2021          | EPI_ISL_4362642  | OK293973 | ?                                 |  | ?                                                                                         | Howard et al                                                                                                                                                                                                                                                                                                                                               |
| USA/ID-UI-IIDS-U0796/2020             | EPI_ISL_8373405  | OL901547 | Gritman Medical Center            |  | University of Idaho                                                                       | Andrews et al                                                                                                                                                                                                                                                                                                                                              |
| USA/IA-Noblis-S716B23/2021            | EPI_ISL_5863412  | OK546329 | ?                                 |  | Noblis                                                                                    | Brinkac et al                                                                                                                                                                                                                                                                                                                                              |
| USA/GA-CDC-STM-000051346/2021         | EPI_ISL_1734699  | MZ034924 | ?                                 |  | ?                                                                                         | Howard et al                                                                                                                                                                                                                                                                                                                                               |
| USA/GA-CDC-MMB09687322/2021           | EPI_ISL_4185738  | OK110046 | ?                                 |  | ?                                                                                         | Howard et al                                                                                                                                                                                                                                                                                                                                               |
| hCoV-19/USA/FL-CDC-STM-Y75FDU6RZ/2022 | EPI_ISL_13189585 |          | Helix                             |  | Centers for Disease Control and Prevention Division of Viral Diseases, Pathogen Discovery | Dakota Howard, Dhvani Batra, Peter Cook, Jason Caravas, Benjamin Rambo-Martin, Scott Sammons, Yvette Unoarumhi, Matthew Schmerer, Kristine Lacek, Tymeckia Kendall, Victoria Caban Figueroa, Helix CA, Shatavia Morrison, Christopher Gulvick, Erisa Sula, Clinton Paden, Duncan MacCannell                                                                |
| hCoV-19/USA/FL-CDC-STM-6WKYCSK4Q/2022 | EPI_ISL_13305916 |          | Helix                             |  | Centers for Disease Control and Prevention Division of Viral Diseases, Pathogen Discovery | Dakota Howard, Dhvani Batra, Peter Cook, Jason Caravas, Benjamin Rambo-Martin, Scott Sammons, Yvette Unoarumhi, Matthew Schmerer, Kristine Lacek, Tymeckia Kendall, Victoria Caban Figueroa, Helix CA, Shatavia Morrison, Christopher Gulvick, Erisa Sula, Clinton Paden, Duncan MacCannell                                                                |
| USA/FL-CDC-STM-000049517/2021         | EPI_ISL_1680175  | MZ009908 | ?                                 |  | ?                                                                                         | Howard et al                                                                                                                                                                                                                                                                                                                                               |
| USA/FL-CDC-STM-000019540/2021         | ?                | MW941863 | ?                                 |  | ?                                                                                         | Howard et al                                                                                                                                                                                                                                                                                                                                               |
| USA/FL-CDC-QDX26157325/2021           | EPI_ISL_2874010  | MZ535058 | ?                                 |  | ?                                                                                         | Howard et al                                                                                                                                                                                                                                                                                                                                               |
| USA/FL-CDC-LC07377/2/2022             | ?                | ON941875 | Laboratory Corporation of America |  | CDC-OAMD                                                                                  | Howard et al                                                                                                                                                                                                                                                                                                                                               |
| USA/FL-CDC-LC0611265/2022             | EPI_ISL_12756167 | ON534523 | Laboratory Corporation of America |  | CDC-OAMD                                                                                  | Howard et al                                                                                                                                                                                                                                                                                                                                               |
| USA/FL-CDC-LC0175263/2021             | EPI_ISL_3741634  | MZ985359 | ?                                 |  | ?                                                                                         | Howard et al                                                                                                                                                                                                                                                                                                                                               |

|                                         |                      |              |                                                       |                                                                                           |                                                                                                      |
|-----------------------------------------|----------------------|--------------|-------------------------------------------------------|-------------------------------------------------------------------------------------------|------------------------------------------------------------------------------------------------------|
| USA/FL-CDC-LC0055050/2021               | EPI_ISL_20<br>45537  | MZ180783     | ?                                                     | ?                                                                                         | Howard et al                                                                                         |
| USA/FL-CDC-LC0040054/2021               | EPI_ISL_16<br>80757  | MZ036167     | ?                                                     | ?                                                                                         | Howard et al                                                                                         |
| USA/FL-CDC-LC0029967/2021               | EPI_ISL_14<br>62639  | MW87075<br>4 | ?                                                     | ?                                                                                         | Howard et al                                                                                         |
| USA/FL-CDC-ASC210558849/2021            | EPI_ISL_88<br>71318  | OM30840<br>1 | Aegis Sciences Corporation                            | CDC-OAMD                                                                                  | Howard et al                                                                                         |
| USA/FL-CDC-ASC210208781/2021            | EPI_ISL_38<br>20745  | OK014558     | ?                                                     | ?                                                                                         | Howard et al                                                                                         |
| USA/FL-CDC-ASC210187790/2021            | EPI_ISL_38<br>63412  | OK010924     | ?                                                     | ?                                                                                         | Howard et al                                                                                         |
| USA/FL-CDC-ASC210160756/2021            | EPI_ISL_34<br>30580  | MZ742684     | Aegis Sciences Corporation                            | CDC-OAMD                                                                                  | Howard et al                                                                                         |
| USA/FL-CDC-ASC210106336/2021            | EPI_ISL_24<br>89202  | MZ376006     | ?                                                     | ?                                                                                         | Howard et al                                                                                         |
| USA/FL-CDC-ASC210056818/2021            | EPI_ISL_19<br>96199  | MZ211317     | ?                                                     | ?                                                                                         | Howard et al                                                                                         |
| USA/FL-BPHL-4138/2021                   | EPI_ISL_25<br>67228  | MZ458288     | Florida Bureau of Public Health Laboratories          | FLDOH                                                                                     | Schmedes et al                                                                                       |
| USA/FL-BPHL-12000/2021                  | EPI_ISL_59<br>25309  | OL417301     | Florida Bureau of Public Health Laboratories          | FLDOH                                                                                     | Schmedes et al                                                                                       |
| USA/FHCRC-3858/2020                     | ?                    | MW59330<br>3 | ?                                                     | ?                                                                                         | Pyo et al                                                                                            |
| USA/CT-CDCBI-CRSP_GQFIFR3U5CAY4PEO/2021 | EPI_ISL_21<br>92590  | MZ256511     | Broad Institute Clinical Research Sequencing Platform | Broad Institute Genomic Center for Infectious Diseases                                    | Lemieux et al                                                                                        |
| USA/CO-QDX-2403/2020                    | EPI_ISL_60<br>4691   | MW19112<br>6 | Quest Diagnostics                                     | Quest Diagnostics                                                                         | Rosenthal et al                                                                                      |
| USA/CO-CDPHE-2100549214/2021            | EPI_ISL_12<br>34345  | MW79696<br>5 | CDPHE                                                 | Colorado Department of Public Health and Environment                                      | Bankers et al                                                                                        |
| USA/CO-CDPHE-2010113583/2020            | EPI_ISL_48<br>90691  | OK399256     | CDPHE                                                 | Colorado Department of Public Health and Environment                                      | Bankers et al                                                                                        |
| USA/CO-CDPHE-2010042618/2020            | EPI_ISL_39<br>43828  | OK130670     | CDPHE                                                 | Colorado Department of Public Health and Environment                                      | Bankers et al                                                                                        |
| USA/CO-CDC-MMB14560912/2022             | EPI_ISL_11<br>252333 | ON026769     | Mako Medical                                          | CDC-OAMD                                                                                  | Howard et al                                                                                         |
| USA/CO-CDC-2-3992500/2021               | EPI_ISL_13<br>18387  | MW79273<br>1 | ?                                                     | ?                                                                                         | Queen et al                                                                                          |
| hCoV-19/USA/CA-LACPHL-AF11233/2022      | EPI_ISL_13456148     |              | Pomona Valley Hospital Medical Center                 | Los Angeles County Public Health Laboratories                                             | J. Garrigues et al.                                                                                  |
| USA/CA-CHLA-PLM04975012/2020            | ?                    | MZ622369     | ?                                                     | ?                                                                                         | Shen et al                                                                                           |
| USA/CA-CDPH-3000135358/2021             | EPI_ISL_49<br>26079  | OK421393     | CDPH VBL                                              | California Department of Public Health                                                    | Smith et al                                                                                          |
| USA/CA-CDPH-3000119400/2021             | EPI_ISL_83<br>98381  | OM15153<br>9 | CDPH VBL                                              | California Department of Public Health                                                    | Smith et al                                                                                          |
| USA/CA-CDPH-3000010177/2021             | EPI_ISL_86<br>35071  | OM25133<br>7 | CDPH VBL                                              | California Department of Public Health                                                    | Smith et al                                                                                          |
| USA/CA-CDC-STM-ZM9M59ZK8/2022           | EPI_ISL_12<br>923609 | ON611605     | 'Helix'                                               | CDC-OAMD                                                                                  | Howard et al                                                                                         |
| USA/CA-CDC-STM-E7WU2WUQC/2022           | ?                    | ON717681     | 'Helix'                                               | CDC-OAMD                                                                                  | Howard et al                                                                                         |
| USA/CA-CDC-STM-000045047/2021           | EPI_ISL_15<br>92665  | MW93224<br>8 | ?                                                     | ?                                                                                         | Howard et al                                                                                         |
| hCoV-19/USA/CA-CDC-QDX38045705/2022     | EPI_ISL_13592575     |              | Quest Diagnostics Incorporated                        | Centers for Disease Control and Prevention Division of Viral Diseases, Pathogen Discovery | Dakota Howard, Dhvani Batra, Peter Cook, Jason Caravas, Benjamin Rambo-Martin, Scott Sammons, Yvette |



|                                             |                  |                                   |                                                                                                    |                                                                                                                                                                                                                                                                                                                                                                                                                                                                                                                    |
|---------------------------------------------|------------------|-----------------------------------|----------------------------------------------------------------------------------------------------|--------------------------------------------------------------------------------------------------------------------------------------------------------------------------------------------------------------------------------------------------------------------------------------------------------------------------------------------------------------------------------------------------------------------------------------------------------------------------------------------------------------------|
|                                             |                  |                                   |                                                                                                    | Unoarumhi, Matthew<br>Schmerer, Kristine Lacek,<br>Tymeckia Kendall, Victoria<br>Caban Figueroa, Shatavia<br>Morrison, Christopher<br>Gulvick, Erisa Sula, S.<br>Rosenthal, A. Gerasimova,<br>R. Kagan, B. Anderson, M.<br>Hua, Y. Liu, L. Bernstein, K.<br>Livingston, A. Perez, I.<br>Shlyakhter, R. Rolando, R.<br>Owen, P. Tanpaiboon, F.<br>Lacbawan, Clinton Paden,<br>Duncan MacCannell                                                                                                                     |
| hCoV-19/USA/CA-<br>CDC-<br>QDX37843144/2022 | EPI_ISL_13469208 | Quest Diagnostics<br>Incorporated | Centers for Disease<br>Control and Prevention<br>Division of Viral Diseases,<br>Pathogen Discovery | Dakota Howard, Dhvani<br>Batra, Peter Cook, Jason<br>Caravas, Benjamin<br>Rambo-Martin, Scott<br>Sammons, Yvette<br>Unoarumhi, Matthew<br>Schmerer, Kristine Lacek,<br>Tymeckia Kendall, Victoria<br>Caban Figueroa, Shatavia<br>Morrison, Christopher<br>Gulvick, Erisa Sula, S.<br>Rosenthal, A. Gerasimova,<br>R. Kagan, B. Anderson, M.<br>Hua, Y. Liu, L. Bernstein, K.<br>Livingston, A. Perez, I.<br>Shlyakhter, R. Rolando, R.<br>Owen, P. Tanpaiboon, F.<br>Lacbawan, Clinton Paden,<br>Duncan MacCannell |
| hCoV-19/USA/CA-<br>CDC-<br>QDX37800392/2022 | EPI_ISL_13464632 | Quest Diagnostics<br>Incorporated | Centers for Disease<br>Control and Prevention<br>Division of Viral Diseases,<br>Pathogen Discovery | Dakota Howard, Dhvani<br>Batra, Peter Cook, Jason<br>Caravas, Benjamin<br>Rambo-Martin, Scott<br>Sammons, Yvette<br>Unoarumhi, Matthew<br>Schmerer, Kristine Lacek,<br>Tymeckia Kendall, Victoria<br>Caban Figueroa, Shatavia<br>Morrison, Christopher<br>Gulvick, Erisa Sula, S.<br>Rosenthal, A. Gerasimova,<br>R. Kagan, B. Anderson, M.<br>Hua, Y. Liu, L. Bernstein, K.<br>Livingston, A. Perez, I.<br>Shlyakhter, R. Rolando, R.<br>Owen, P. Tanpaiboon, F.<br>Lacbawan, Clinton Paden,<br>Duncan MacCannell |
| hCoV-19/USA/CA-<br>CDC-<br>QDX37556192/2022 | EPI_ISL_13546798 | Quest Diagnostics<br>Incorporated | Centers for Disease<br>Control and Prevention<br>Division of Viral Diseases,<br>Pathogen Discovery | Dakota Howard, Dhvani<br>Batra, Peter Cook, Jason<br>Caravas, Benjamin<br>Rambo-Martin, Scott<br>Sammons, Yvette<br>Unoarumhi, Matthew<br>Schmerer, Kristine Lacek,<br>Tymeckia Kendall, Victoria<br>Caban Figueroa, Shatavia<br>Morrison, Christopher<br>Gulvick, Erisa Sula, S.<br>Rosenthal, A. Gerasimova,<br>R. Kagan, B. Anderson, M.<br>Hua, Y. Liu, L. Bernstein, K.<br>Livingston, A. Perez, I.                                                                                                           |

|                                            |                  |          |                                   |                                                                                                 |                                                                                                                                                                                                                                                                                                                                                                                                                                                                                                                                                                                                                                                                                                                                                                                                                                          |
|--------------------------------------------|------------------|----------|-----------------------------------|-------------------------------------------------------------------------------------------------|------------------------------------------------------------------------------------------------------------------------------------------------------------------------------------------------------------------------------------------------------------------------------------------------------------------------------------------------------------------------------------------------------------------------------------------------------------------------------------------------------------------------------------------------------------------------------------------------------------------------------------------------------------------------------------------------------------------------------------------------------------------------------------------------------------------------------------------|
|                                            |                  |          |                                   |                                                                                                 | Shlyakhter, R. Rolando, R. Owen, P. Tanpaiboon, F. Lacbawan, Clinton Paden, Duncan MacCannell                                                                                                                                                                                                                                                                                                                                                                                                                                                                                                                                                                                                                                                                                                                                            |
| <b>USA/CA-CDC-QDX37549809/2022</b>         | ?                | ON761582 | Quest Diagnostics Incorporated    | CDC-OAMD                                                                                        | Howard et al                                                                                                                                                                                                                                                                                                                                                                                                                                                                                                                                                                                                                                                                                                                                                                                                                             |
| <b>hCoV-19/USA/CA-CDC-QDX37346235/2022</b> | EPI_ISL_13261675 |          | Quest Diagnostics Incorporated    | Centers for Disease Control and Prevention<br>Division of Viral Diseases,<br>Pathogen Discovery | Dakota Howard, Dhvani Batra, Peter Cook, Jason Caravas, Benjamin Rambo-Martin, Scott Sammons, Yvette Unoarumhi, Matthew Schmerer, Kristine Lacek, Tymeckia Kendall, Victoria Caban Figueroa, Shatavia Morrison, Christopher Gulvick, Erisa Sula, S. Rosenthal, A. Gerasimova, R. Kagari, B. Anderson, M. Hua, Y. Liu, L. Bernstein, K. Livingston, A. Perez, I. Shlyakhter, R. Rolando, R. Owen, P. Tanpaiboon, F. Lacbawan, Clinton Paden, Duncan MacCannell                                                                                                                                                                                                                                                                                                                                                                            |
| <b>USA/CA-CDC-QDX37144143/2022</b>         | ?                | ON679441 | Quest Diagnostics Incorporated    | CDC-OAMD                                                                                        | Howard et al                                                                                                                                                                                                                                                                                                                                                                                                                                                                                                                                                                                                                                                                                                                                                                                                                             |
| <b>USA/CA-CDC-QDX21613497/2021</b>         | EPI_ISL_1088480  | MW671676 | ?                                 | ?                                                                                               | Cook et al                                                                                                                                                                                                                                                                                                                                                                                                                                                                                                                                                                                                                                                                                                                                                                                                                               |
| <b>hCoV-19/USA/CA-CDC-LC0736697/2022</b>   | EPI_ISL_13707615 |          | Laboratory Corporation of America | Centers for Disease Control and Prevention<br>Division of Viral Diseases,<br>Pathogen Discovery | Dakota Howard, Dhvani Batra, Peter Cook, Jason Caravas, Benjamin Rambo-Martin, Scott Sammons, Yvette Unoarumhi, Matthew Schmerer, Kristine Lacek, Tymeckia Kendall, Victoria Caban Figueroa, Shatavia Morrison, Christopher Gulvick, Minoo Agarwal, Eyad Almasri, Debbie Boles, Ayla Burns, Nuthawin Charoensri, Oren Cohen, Susan Countryman, Mary Cristobal, Bobbi Croy, Suzanne Dale, Hrushikesh Deshmukh, Amanda Douglas, Vincent Drouillon, Marcia Eisenberg, Howard Engler, Rama Ghatti, Prashant Gupta, Susan Hicks, Jake Humphrey, Lax Iyer, Lisa Pfefferle, Manoj Jain, Matthew Robinson, Mohan Kolli, Brian Krueger, Tim Kuphal, Stanley Letovsky, Michael Levandoski, Craig Lukasik, Jonathan Meltzer, Brian Norvell, Mindy Nye, Scott Parker, Christos Petropoulos, John Pruitt, Steven Ragan, Scott Ryan, Mike Sapeta, Jana |

Schroth, Suresh Selvaraju, Goran Stevovic, Amanda Suchanek, Andrea Throop, Lyndon Tilson, Thomas Urban, Joe Vosniell, Kimberly Wagner, Jonathan Williams, Mary Williamson, Qian Zeng, Tricia Zwiefelhofer, Clinton Paden, Duncan MacCannell

Dakota Howard, Dhvani Batra, Peter Cook, Jason Caravas, Benjamin Rambo-Martin, Scott Sammons, Yvette Unoarumhi, Matthew Schmerer, Kristine Lacek, Tymeckia Kendall, Victoria Caban Figueroa, Shatavia Morrison, Christopher Gulvick, Minoo Agarwal, Eyad Almasri, Debbie Boles, Ayla Burns, Nuthawin Charoensri, Oren Cohen, Susan Countryman, Mary Cristobal, Bobbi Croy, Suzanne Dale, Hrushikesh Deshmukh, Amanda Douglas, Vincent Drouillon, Marcia Eisenberg, Howard Engler, Rama Ghatti, Prashant Gupta, Susan Hicks, Jake Humphrey, Lax Iyer, Lisa Pfefferle, Manoj Jain, Matthew Robinson, Mohan Kolli, Brian Krueger, Tim Kuphal, Stanley Letovsky, Michael Levandoski, Craig Lukasik, Jonathan Meltzer, Brian Norvell, Mindy Nye, Scott Parker, Christos Petropoulos, John Pruitt, Steven Ragan, Scott Ryan, Mike Sapeta, Jana Schroth, Suresh Selvaraju, Goran Stevovic, Amanda Suchanek, Andrea Throop, Lyndon Tilson, Thomas Urban, Joe Voshell, Kimberly Wagner, Jonathan Williams, Mary Williamson, Qian Zeng, Tricia Zwiefelhofer, Clinton Paden, Duncan MacCannell

hCoV-19/USA/CA-  
CDC-LC0704156/2022

EPI\_ISL\_13551457

Laboratory Corporation of  
America

Centers for Disease  
Control and Prevention  
Division of Viral Diseases,  
Pathogen Discovery

|                           |                  |          |                                   |          |              |
|---------------------------|------------------|----------|-----------------------------------|----------|--------------|
| USA/CA-CDC-LC0633203/2022 | EPI_ISL_22890567 | ON593596 | Laboratory Corporation of America | CDC-OAMD | Howard et al |
| USA/CA-CDC-LC0284812/2021 | EPI_ISL_4811830  | OK364989 | ?                                 | ?        | Howard et al |
| USA/CA-CDC-LC073796/2021  | EPI_ISL_4374758  | OK231331 | ?                                 | ?        | Howard et al |
| USA/CA-CDC-FG-185174/2021 | EPI_ISL_7567955  | OL823952 | Fulgent Genetics                  | CDC-OAMD | Howard et al |

|                                              |                     |              |                                   |                                                                                                 |                                                                                                                                                                                                                                                                                                                                                                                                                                                                                                                                                                                                                                                                                                                                                                                                                                                                                                                                                                                |
|----------------------------------------------|---------------------|--------------|-----------------------------------|-------------------------------------------------------------------------------------------------|--------------------------------------------------------------------------------------------------------------------------------------------------------------------------------------------------------------------------------------------------------------------------------------------------------------------------------------------------------------------------------------------------------------------------------------------------------------------------------------------------------------------------------------------------------------------------------------------------------------------------------------------------------------------------------------------------------------------------------------------------------------------------------------------------------------------------------------------------------------------------------------------------------------------------------------------------------------------------------|
| <b>USA/CA-CDC-FG-042124/2021</b>             | EPI_ISL_43<br>71468 | OK215038     | ?                                 | ?                                                                                               | Howard et al                                                                                                                                                                                                                                                                                                                                                                                                                                                                                                                                                                                                                                                                                                                                                                                                                                                                                                                                                                   |
| <b>USA/CA-CDC-FG-010119/2021</b>             | EPI_ISL_14<br>57823 | MW85846<br>3 | ?                                 | ?                                                                                               | Howard et al                                                                                                                                                                                                                                                                                                                                                                                                                                                                                                                                                                                                                                                                                                                                                                                                                                                                                                                                                                   |
| <b>USA/CA-CDC-FG-010087/2021</b>             | EPI_ISL_14<br>81947 | MW86615<br>4 | ?                                 | ?                                                                                               | Howard et al                                                                                                                                                                                                                                                                                                                                                                                                                                                                                                                                                                                                                                                                                                                                                                                                                                                                                                                                                                   |
| <b>USA/CA-CDC-ASC210248330/2021</b>          | EPI_ISL_38<br>15586 | MZ978662     | ?                                 | ?                                                                                               | Howard et al                                                                                                                                                                                                                                                                                                                                                                                                                                                                                                                                                                                                                                                                                                                                                                                                                                                                                                                                                                   |
| <b>hCoV-19/USA/AZ-CDC-STM-YCXKETKS5/2022</b> | EPI_ISL_12923601    |              | Helix                             | Centers for Disease Control and Prevention<br>Division of Viral Diseases,<br>Pathogen Discovery | Dakota Howard, Dhvani Batra, Peter Cook, Jason Caravas, Benjamin Rambo-Martin, Scott Sammons, Yvette Unoarumhi, Matthew Schmerer, Kristine Lacek, Tymeckia Kendall, Victoria Caban Figueroa, Helix CA, Shatavia Morrison, Christopher Gulvick, Erisa Sula, Clinton Paden, Duncan MacCannell                                                                                                                                                                                                                                                                                                                                                                                                                                                                                                                                                                                                                                                                                    |
| <b>USA/AZ-CDC-LC0731088/2022</b>             | ?                   | ON916761     | Laboratory Corporation of America | CDC-OAMD                                                                                        | Howard et al                                                                                                                                                                                                                                                                                                                                                                                                                                                                                                                                                                                                                                                                                                                                                                                                                                                                                                                                                                   |
| <b>hCoV-19/USA/AZ-CDC-LC0641621/2022</b>     | EPI_ISL_12923741    |              | Laboratory Corporation of America | Centers for Disease Control and Prevention<br>Division of Viral Diseases,<br>Pathogen Discovery | Dakota Howard, Dhvani Batra, Peter Cook, Jason Caravas, Benjamin Rambo-Martin, Scott Sammons, Yvette Unoarumhi, Matthew Schmerer, Kristine Lacek, Tymeckia Kendall, Victoria Caban Figueroa, Shatavia Morrison, Christopher Gulvick, Minoo Agarwal, Eyad Almasri, Debbie Boles, Ayla Burns, Nuthawin Charoensri, Oren Cohen, Susan Countryman, Mary Cristobal, Bobbi Croy, Suzanne Dale, Hrushikesh Deshmukh, Amanda Douglas, Vincent Drouillon, Marcia Eisenberg, Howard Engler, Rama Ghatti, Prashant Gupta, Susan Hicks, Jake Humphrey, Lax Iyer, Lisa Pfefferle, Manoj Jain, Matthew Robinson, Mohan Kolli, Brian Krueger, Tim Kuphal, Stanley Letovsky, Michael Levandoski, Craig Lukasik, Jonathan Meltzer, Brian Norvell, Mindy Nye, Scott Parker, Christos Petropoulos, John Pruitt, Steven Ragan, Scott Ryan, Mike Sapeta, Jana Schroth, Suresh Selvaraju, Goran Stevovic, Amanda Suchanek, Andrea Throop, Lyndon Tilson, Thomas Urban, Joe Voshell, Kimberly Wagner, |

|                                     |                  |          |                                                              |                                                                                                   |                                                                                                                                                                                                                 |
|-------------------------------------|------------------|----------|--------------------------------------------------------------|---------------------------------------------------------------------------------------------------|-----------------------------------------------------------------------------------------------------------------------------------------------------------------------------------------------------------------|
|                                     |                  |          |                                                              |                                                                                                   | Jonathan Williams, Mary Williamson, Qian Zeng, Tricia Zwielfhofer, Clinton Paden, Duncan MacCannell                                                                                                             |
| USA/AZ-CDC-ASC210243720/2021        | EPI_ISL_4360761  | OK292256 | ?                                                            | ?                                                                                                 | Howard et al                                                                                                                                                                                                    |
| USA/AK-PHL9297/2021                 | EPI_ISL_2467800  | OL469688 | ?                                                            | ?                                                                                                 | DeRonde et al                                                                                                                                                                                                   |
| USA/AK-PHL12626/2021                | EPI_ISL_4298613  | OK189078 | ?                                                            | ?                                                                                                 | DeRonde et al                                                                                                                                                                                                   |
| USA/1508xG11/2020                   | EPI_ISL_884512   | MW521450 | ?                                                            | ?                                                                                                 | Tang et al                                                                                                                                                                                                      |
| hCoV-19/Thailand/NIC_BKK_18820/2022 | EPI_ISL_12861833 |          | Vichaivej International Hospital Nong Khaem                  | National Institute of Health, Department of Medical Sciences, Ministry of Public Health, Thailand | Pilailuk Okada; Siripaporn Phuygun; Nuttida Thongpramul; Pakorn Piromtong; Natchaya Khiadsang; Thanutsapa Thanadachakul; Sirikanda Wimol; Suratchana Mitrat; Sunthareeya Waicharoen; Archawin Rojanawiwat       |
| hCoV-19/Thailand/NIC_BKK_18819/2022 | EPI_ISL_12861832 |          | Vichaivej International Hospital Nong Khaem                  | National Institute of Health, Department of Medical Sciences, Ministry of Public Health, Thailand | Pilailuk Okada; Siripaporn Phuygun; Nuttida Thongpramul; Pakorn Piromtong; Natchaya Khiadsang; Thanutsapa Thanadachakul; Sirikanda Wimol; Suratchana Mitrat; Sunthareeya Waicharoen; Archawin Rojanawiwat       |
| hCoV-19/Thailand/NIC_BKK_18713/2022 | EPI_ISL_12727577 |          | Vichaivej International Hospital Nong Khaem                  | National Institute of Health, Department of Medical Sciences, Ministry of Public Health, Thailand | Pilailuk Okada; Siripaporn Phuygun; Nuttida Thongpramul; Pakorn Piromtong; Natchaya Khiadsang; Thanutsapa Thanadachakul; Sirikanda Wimol; Suratchana Mitrat; Sunthareeya Waicharoen; Archawin Rojanawiwat       |
| hCoV-19/Taiwan/w3586/2020           | EPI_ISL_639911   |          | Division of Clinical Pathology, Tri-service General Hospital | Institute of Preventive Medicine, National Defense Medical Center                                 | Tein-Yao Chang, Cheng-Lih Perng, Hung-Sheng Shang                                                                                                                                                               |
| hCoV-19/Taiwan/TSGH-78/2022         | EPI_ISL_13539973 | ?        | TSGH-CP molecular lab                                        | TSGH-CP molecular lab                                                                             | Cherng-Lih Perng, Ming-Jr JIAN, Chih-Kai Chang, Jung-Chung Lin, Kuo-Ming Yeh, Chien-Wen Chen, Sheng-Kang Chiu, Hsing-Yi Chung, Shih-Hung Tsai, Kuo-Sheng Hung, Tien-Yao Chang, Feng-Yee Chang, Hung-Sheng Shang |
| hCoV-19/Taiwan/TSGH-77/2022         | EPI_ISL_13393147 |          | TSGH-CP molecular lab                                        | TSGH-CP molecular lab                                                                             | Cherng-Lih Perng, Ming-Jr JIAN, Chih-Kai Chang, Jung-Chung Lin, Kuo-Ming Yeh, Chien-Wen Chen, Sheng-Kang Chiu, Hsing-Yi Chung, Shih-Hung Tsai, Kuo-Sheng Hung, Tien-Yao Chang, Feng-Yee Chang, Hung-Sheng Shang |
| hCoV-19/Taiwan/TSGH-76/2022         | EPI_ISL_13393145 |          | TSGH-CP molecular lab                                        | TSGH-CP molecular lab                                                                             | Cherng-Lih Perng, Ming-Jr JIAN, Chih-Kai Chang, Jung-Chung Lin, Kuo-Ming Yeh, Chien-Wen Chen, Sheng-Kang Chiu, Hsing-Yi                                                                                         |

|                                              |                  |                       |                       |                                                                                                                                                                                                                                         |
|----------------------------------------------|------------------|-----------------------|-----------------------|-----------------------------------------------------------------------------------------------------------------------------------------------------------------------------------------------------------------------------------------|
|                                              |                  |                       |                       | Chung, Shih-Hung Tsai,<br>Kuo-Sheng Hung, Tien-Yao<br>Chang, Feng-Yee Chang,<br>Hung-Sheng Shang                                                                                                                                        |
| <b>hCoV-<br/>19/Taiwan/TSGH-<br/>75/2022</b> | EPI_ISL_13393143 | TSGH-CP molecular lab | TSGH-CP molecular lab | Cherng-Lih Perng, Ming-Jr<br>JIAN, Chih-Kai Chang,<br>Jung-Chung Lin, Kuo-Ming<br>Yeh, Chien-Wen Chen,<br>Sheng-Kang Chiu, Hsing-Yi<br>Chung, Shih-Hung Tsai,<br>Kuo-Sheng Hung, Tien-Yao<br>Chang, Feng-Yee Chang,<br>Hung-Sheng Shang |
| <b>hCoV-<br/>19/Taiwan/TSGH-<br/>74/2022</b> | EPI_ISL_13393137 | TSGH-CP molecular lab | TSGH-CP molecular lab | Cherng-Lih Perng, Ming-Jr<br>JIAN, Chih-Kai Chang,<br>Jung-Chung Lin, Kuo-Ming<br>Yeh, Chien-Wen Chen,<br>Sheng-Kang Chiu, Hsing-Yi<br>Chung, Shih-Hung Tsai,<br>Kuo-Sheng Hung, Tien-Yao<br>Chang, Feng-Yee Chang,<br>Hung-Sheng Shang |
| <b>hCoV-<br/>19/Taiwan/TSGH-<br/>73/2022</b> | EPI_ISL_13199862 | TSGH-CP molecular lab | TSGH-CP molecular lab | Cherng-Lih Perng, Ming-Jr<br>JIAN, Chih-Kai Chang,<br>Jung-Chung Lin, Kuo-Ming<br>Yeh, Chien-Wen Chen,<br>Sheng-Kang Chiu, Hsing-Yi<br>Chung, Shih-Hung Tsai,<br>Kuo-Sheng Hung, Tien-Yao<br>Chang, Feng-Yee Chang,<br>Hung-Sheng Shang |
| <b>hCoV-<br/>19/Taiwan/TSGH-<br/>72/2022</b> | EPI_ISL_13199850 | TSGH-CP molecular lab | TSGH-CP molecular lab | Cherng-Lih Perng, Ming-Jr<br>JIAN, Chih-Kai Chang,<br>Jung-Chung Lin, Kuo-Ming<br>Yeh, Chien-Wen Chen,<br>Sheng-Kang Chiu, Hsing-Yi<br>Chung, Shih-Hung Tsai,<br>Kuo-Sheng Hung, Tien-Yao<br>Chang, Feng-Yee Chang,<br>Hung-Sheng Shang |
| <b>hCoV-<br/>19/Taiwan/TSGH-<br/>71/2022</b> | EPI_ISL_13199637 | TSGH-CP molecular lab | TSGH-CP molecular lab | Cherng-Lih Perng, Ming-Jr<br>JIAN, Chih-Kai Chang,<br>Jung-Chung Lin, Kuo-Ming<br>Yeh, Chien-Wen Chen,<br>Sheng-Kang Chiu, Hsing-Yi<br>Chung, Shih-Hung Tsai,<br>Kuo-Sheng Hung, Tien-Yao<br>Chang, Feng-Yee Chang,<br>Hung-Sheng Shang |
| <b>hCoV-<br/>19/Taiwan/TSGH-<br/>7J/2022</b> | EPI_ISL_13199653 | TSGH-CP molecular lab | TSGH-CP molecular lab | Cherng-Lih Perng, Ming-Jr<br>JIAN, Chih-Kai Chang,<br>Jung-Chung Lin, Kuo-Ming<br>Yeh, Chien-Wen Chen,<br>Sheng-Kang Chiu, Hsing-Yi<br>Chung, Shih-Hung Tsai,<br>Kuo-Sheng Hung, Tien-Yao<br>Chang, Feng-Yee Chang,<br>Hung-Sheng Shang |
| <b>hCoV-<br/>19/Taiwan/TSGH-<br/>69/2022</b> | EPI_ISL_11903003 | TSGH-CP molecular lab | TSGH-CP molecular lab | Cherng-Lih Perng, Ming-Jr<br>JIAN, Chih-Kai Chang,<br>Jung-Chung Lin, Kuo-Ming<br>Yeh, Chien-Wen Chen,<br>Sheng-Kang Chiu, Hsing-Yi<br>Chung, Shih-Hung Tsai,<br>Kuo-Sheng Hung, Tien-Yao                                               |

|                                    |                  |                       |                       |                                                                                                                                                                                                                 |
|------------------------------------|------------------|-----------------------|-----------------------|-----------------------------------------------------------------------------------------------------------------------------------------------------------------------------------------------------------------|
|                                    |                  |                       |                       | Chang, Feng-Yee Chang,<br>Hung-Sheng Shang                                                                                                                                                                      |
| <b>hCoV-19/Taiwan/TSGH-68/2022</b> | EPI_ISL_11903002 | TSGH-CP molecular lab | TSGH-CP molecular lab | Cherng-Lih Perng, Ming-Jr JIAN, Chih-Kai Chang, Jung-Chung Lin, Kuo-Ming Yeh, Chien-Wen Chen, Sheng-Kang Chiu, Hsing-Yi Chung, Shih-Hung Tsai, Kuo-Sheng Hung, Tien-Yao Chang, Feng-Yee Chang, Hung-Sheng Shang |
| <b>hCoV-19/Taiwan/TSGH-67/2022</b> | EPI_ISL_11903001 | TSGH-CP molecular lab | TSGH-CP molecular lab | Cherng-Lih Perng, Ming-Jr JIAN, Chih-Kai Chang, Jung-Chung Lin, Kuo-Ming Yeh, Chien-Wen Chen, Sheng-Kang Chiu, Hsing-Yi Chung, Shih-Hung Tsai, Kuo-Sheng Hung, Tien-Yao Chang, Feng-Yee Chang, Hung-Sheng Shang |
| <b>hCoV-19/Taiwan/TSGH-66/2022</b> | EPI_ISL_11903000 | TSGH-CP molecular lab | TSGH-CP molecular lab | Cherng-Lih Perng, Ming-Jr JIAN, Chih-Kai Chang, Jung-Chung Lin, Kuo-Ming Yeh, Chien-Wen Chen, Sheng-Kang Chiu, Hsing-Yi Chung, Shih-Hung Tsai, Kuo-Sheng Hung, Tien-Yao Chang, Feng-Yee Chang, Hung-Sheng Shang |
| <b>hCoV-19/Taiwan/TSGH-65/2022</b> | EPI_ISL_11902998 | TSGH-CP molecular lab | TSGH-CP molecular lab | Cherng-Lih Perng, Ming-Jr JIAN, Chih-Kai Chang, Jung-Chung Lin, Kuo-Ming Yeh, Chien-Wen Chen, Sheng-Kang Chiu, Hsing-Yi Chung, Shih-Hung Tsai, Kuo-Sheng Hung, Tien-Yao Chang, Feng-Yee Chang, Hung-Sheng Shang |
| <b>hCoV-19/Taiwan/TSGH-64/2022</b> | EPI_ISL_11902997 | TSGH-CP molecular lab | TSGH-CP molecular lab | Cherng-Lih Perng, Ming-Jr JIAN, Chih-Kai Chang, Jung-Chung Lin, Kuo-Ming Yeh, Chien-Wen Chen, Sheng-Kang Chiu, Hsing-Yi Chung, Shih-Hung Tsai, Kuo-Sheng Hung, Tien-Yao Chang, Feng-Yee Chang, Hung-Sheng Shang |
| <b>hCoV-19/Taiwan/TSGH-63/2022</b> | EPI_ISL_11147495 | TSGH-CP molecular lab | TSGH-CP molecular lab | Cherng-Lih Perng, Ming-Jr JIAN, Chih-Kai Chang, Jung-Chung Lin, Kuo-Ming Yeh, Chien-Wen Chen, Sheng-Kang Chiu, Hsing-Yi Chung, Shih-Hung Tsai, Kuo-Sheng Hung, Tien-Yao Chang, Feng-Yee Chang, Hung-Sheng Shang |
| <b>hCoV-19/Taiwan/TSGH-62/2022</b> | EPI_ISL_11147476 | TSGH-CP molecular lab | TSGH-CP molecular lab | Cherng-Lih Perng, Ming-Jr JIAN, Chih-Kai Chang, Jung-Chung Lin, Kuo-Ming Yeh, Chien-Wen Chen, Sheng-Kang Chiu, Hsing-Yi Chung, Shih-Hung Tsai, Kuo-Sheng Hung, Tien-Yao Chang, Feng-Yee Chang, Hung-Sheng Shang |

|                             |                  |                       |                       |                                                                                                                                                                                                                 |
|-----------------------------|------------------|-----------------------|-----------------------|-----------------------------------------------------------------------------------------------------------------------------------------------------------------------------------------------------------------|
| hCoV-19/Taiwan/TSGH-61/2022 | EPI_ISL_11147460 | TSGH-CP molecular lab | TSGH-CP molecular lab | Cherng-Lih Perng, Ming-Jr JIAN, Chih-Kai Chang, Jung-Chung Lin, Kuo-Ming Yeh, Chien-Wen Chen, Sheng-Kang Chiu, Hsing-Yi Chung, Shih-Hung Tsai, Kuo-Sheng Hung, Tien-Yao Chang, Feng-Yee Chang, Hung-Sheng Shang |
| hCoV-19/Taiwan/TSGH-60/2022 | EPI_ISL_11147455 | TSGH-CP molecular lab | TSGH-CP molecular lab | Cherng-Lih Perng, Ming-Jr JIAN, Chih-Kai Chang, Jung-Chung Lin, Kuo-Ming Yeh, Chien-Wen Chen, Sheng-Kang Chiu, Hsing-Yi Chung, Shih-Hung Tsai, Kuo-Sheng Hung, Tien-Yao Chang, Feng-Yee Chang, Hung-Sheng Shang |
| hCoV-19/Taiwan/TSGH-59/2022 | EPI_ISL_11147445 | TSGH-CP molecular lab | TSGH-CP molecular lab | Cherng-Lih Perng, Ming-Jr JIAN, Chih-Kai Chang, Jung-Chung Lin, Kuo-Ming Yeh, Chien-Wen Chen, Sheng-Kang Chiu, Hsing-Yi Chung, Shih-Hung Tsai, Kuo-Sheng Hung, Tien-Yao Chang, Feng-Yee Chang, Hung-Sheng Shang |
| hCoV-19/Taiwan/TSGH-58/2022 | EPI_ISL_11147434 | TSGH-CP molecular lab | TSGH-CP molecular lab | Cherng-Lih Perng, Ming-Jr JIAN, Chih-Kai Chang, Jung-Chung Lin, Kuo-Ming Yeh, Chien-Wen Chen, Sheng-Kang Chiu, Hsing-Yi Chung, Shih-Hung Tsai, Kuo-Sheng Hung, Tien-Yao Chang, Feng-Yee Chang, Hung-Sheng Shang |
| hCoV-19/Taiwan/TSGH-57/2022 | EPI_ISL_11147432 | TSGH-CP molecular lab | TSGH-CP molecular lab | Cherng-Lih Perng, Ming-Jr JIAN, Chih-Kai Chang, Jung-Chung Lin, Kuo-Ming Yeh, Chien-Wen Chen, Sheng-Kang Chiu, Hsing-Yi Chung, Shih-Hung Tsai, Kuo-Sheng Hung, Tien-Yao Chang, Feng-Yee Chang, Hung-Sheng Shang |
| hCoV-19/Taiwan/TSGH-56/2022 | EPI_ISL_11147431 | TSGH-CP molecular lab | TSGH-CP molecular lab | Cherng-Lih Perng, Ming-Jr JIAN, Chih-Kai Chang, Jung-Chung Lin, Kuo-Ming Yeh, Chien-Wen Chen, Sheng-Kang Chiu, Hsing-Yi Chung, Shih-Hung Tsai, Kuo-Sheng Hung, Tien-Yao Chang, Feng-Yee Chang, Hung-Sheng Shang |
| hCoV-19/Taiwan/TSGH-55/2022 | EPI_ISL_11147430 | TSGH-CP molecular lab | TSGH-CP molecular lab | Cherng-Lih Perng, Ming-Jr JIAN, Chih-Kai Chang, Jung-Chung Lin, Kuo-Ming Yeh, Chien-Wen Chen, Sheng-Kang Chiu, Hsing-Yi Chung, Shih-Hung Tsai, Kuo-Sheng Hung, Tien-Yao Chang, Feng-Yee Chang, Hung-Sheng Shang |
| hCoV-19/Taiwan/TSGH-54/2022 | EPI_ISL_11147419 | TSGH-CP molecular lab | TSGH-CP molecular lab | Cherng-Lih Perng, Ming-Jr JIAN, Chih-Kai Chang, Jung-Chung Lin, Kuo-Ming                                                                                                                                        |



|                                    |                  |                       |                       |                                                                                                                                                                                                                 |
|------------------------------------|------------------|-----------------------|-----------------------|-----------------------------------------------------------------------------------------------------------------------------------------------------------------------------------------------------------------|
|                                    |                  |                       |                       | Yeh, Chien-Wen Chen, Sheng-Kang Chiu, Hsing-Yi Chung, Shih-Hung Tsai, Kuo-Sheng Hung, Tien-Yao Chang, Feng-Yee Chang, Hung-Sheng Shang                                                                          |
| <b>hCoV-19/Taiwan/TSGH-53/2022</b> | EPI_ISL_11147418 | TSGH-CP molecular lab | TSGH-CP molecular lab | Cherng-Lih Perng, Ming-Jr JIAN, Chih-Kai Chang, Jung-Chung Lin, Kuo-Ming Yeh, Chien-Wen Chen, Sheng-Kang Chiu, Hsing-Yi Chung, Shih-Hung Tsai, Kuo-Sheng Hung, Tien-Yao Chang, Feng-Yee Chang, Hung-Sheng Shang |
| <b>hCoV-19/Taiwan/TSGH-52/2021</b> | EPI_ISL_8993636  | TSGH-CP molecular lab | TSGH-CP molecular lab | Cherng-Lih Perng, Ming-Jr JIAN, Chih-Kai Chang, Jung-Chung Lin, Kuo-Ming Yeh, Chien-Wen Chen, Sheng-Kang Chiu, Hsing-Yi Chung, Shih-Hung Tsai, Kuo-Sheng Hung, Tien-Yao Chang, Feng-Yee Chang, Hung-Sheng Shang |
| <b>hCoV-19/Taiwan/TSGH-51/2021</b> | EPI_ISL_8993543  | TSGH-CP molecular lab | TSGH-CP molecular lab | Cherng-Lih Perng, Ming-Jr JIAN, Chih-Kai Chang, Jung-Chung Lin, Kuo-Ming Yeh, Chien-Wen Chen, Sheng-Kang Chiu, Hsing-Yi Chung, Shih-Hung Tsai, Kuo-Sheng Hung, Tien-Yao Chang, Feng-Yee Chang, Hung-Sheng Shang |
| <b>hCoV-19/Taiwan/TSGH-50/2021</b> | EPI_ISL_8993542  | TSGH-CP molecular lab | TSGH-CP molecular lab | Cherng-Lih Perng, Ming-Jr JIAN, Chih-Kai Chang, Jung-Chung Lin, Kuo-Ming Yeh, Chien-Wen Chen, Sheng-Kang Chiu, Hsing-Yi Chung, Shih-Hung Tsai, Kuo-Sheng Hung, Tien-Yao Chang, Feng-Yee Chang, Hung-Sheng Shang |
| <b>hCoV-19/Taiwan/TSGH-49/2021</b> | EPI_ISL_8993540  | TSGH-CP molecular lab | TSGH-CP molecular lab | Cherng-Lih Perng, Ming-Jr JIAN, Chih-Kai Chang, Jung-Chung Lin, Kuo-Ming Yeh, Chien-Wen Chen, Sheng-Kang Chiu, Hsing-Yi Chung, Shih-Hung Tsai, Kuo-Sheng Hung, Tien-Yao Chang, Feng-Yee Chang, Hung-Sheng Shang |
| <b>hCoV-19/Taiwan/TSGH-48/2021</b> | EPI_ISL_8993539  | TSGH-CP molecular lab | TSGH-CP molecular lab | Cherng-Lih Perng, Ming-Jr JIAN, Chih-Kai Chang, Jung-Chung Lin, Kuo-Ming Yeh, Chien-Wen Chen, Sheng-Kang Chiu, Hsing-Yi Chung, Shih-Hung Tsai, Kuo-Sheng Hung, Tien-Yao Chang, Feng-Yee Chang, Hung-Sheng Shang |
| <b>hCoV-19/Taiwan/TSGH-47/2021</b> | EPI_ISL_4578347  | TSGH-CP molecular lab | TSGH-CP molecular lab | Cherng-Lih Perng, Ming-Jr JIAN, Chih-Kai Chang, Jung-Chung Lin, Kuo-Ming Yeh, Chien-Wen Chen, Sheng-Kang Chiu, Hsing-Yi Chung, Shih-Hung Tsai,                                                                  |

|                                    |                 |                       |                       |                                                                                                                                                                                                                 |
|------------------------------------|-----------------|-----------------------|-----------------------|-----------------------------------------------------------------------------------------------------------------------------------------------------------------------------------------------------------------|
|                                    |                 |                       |                       | Kuo-Sheng Hung, Tien-Yao Chang, Feng-Yee Chang, Hung-Sheng Shang                                                                                                                                                |
| <b>hCoV-19/Taiwan/TSGH-46/2021</b> | EPI_ISL_4096807 | TSGH-CP molecular lab | TSGH-CP molecular lab | Cherng-Lih Perng, Ming-Jr JIAN, Chih-Kai Chang, Jung-Chung Lin, Kuo-Ming Yeh, Chien-Wen Chen, Sheng-Kang Chiu, Hsing-Yi Chung, Shih-Hung Tsai, Kuo-Sheng Hung, Tien-Yao Chang, Feng-Yee Chang, Hung-Sheng Shang |
| <b>hCoV-19/Taiwan/TSGH-45/2021</b> | EPI_ISL_4096805 | TSGH-CP molecular lab | TSGH-CP molecular lab | Cherng-Lih Perng, Ming-Jr JIAN, Chih-Kai Chang, Jung-Chung Lin, Kuo-Ming Yeh, Chien-Wen Chen, Sheng-Kang Chiu, Hsing-Yi Chung, Shih-Hung Tsai, Kuo-Sheng Hung, Tien-Yao Chang, Feng-Yee Chang, Hung-Sheng Shang |
| <b>hCoV-19/Taiwan/TSGH-44/2021</b> | EPI_ISL_4096803 | TSGH-CP molecular lab | TSGH-CP molecular lab | Cherng-Lih Perng, Ming-Jr JIAN, Chih-Kai Chang, Jung-Chung Lin, Kuo-Ming Yeh, Chien-Wen Chen, Sheng-Kang Chiu, Hsing-Yi Chung, Shih-Hung Tsai, Kuo-Sheng Hung, Tien-Yao Chang, Feng-Yee Chang, Hung-Sheng Shang |
| <b>hCoV-19/Taiwan/TSGH-43/2021</b> | EPI_ISL_2693006 | TSGH-CP molecular lab | TSGH-CP molecular lab | Cherng-Lih Perng, Ming-Jr JIAN, Chih-Kai Chang, Jung-Chung Lin, Kuo-Ming Yeh, Chien-Wen Chen, Sheng-Kang Chiu, Hsing-Yi Chung, Shih-Hung Tsai, Kuo-Sheng Hung, Tien-Yao Chang, Feng-Yee Chang, Hung-Sheng Shang |
| <b>hCoV-19/Taiwan/TSGH-41/2021</b> | EPI_ISL_2693000 | TSGH-CP molecular lab | TSGH-CP molecular lab | Cherng-Lih Perng, Ming-Jr JIAN, Chih-Kai Chang, Jung-Chung Lin, Kuo-Ming Yeh, Chien-Wen Chen, Sheng-Kang Chiu, Hsing-Yi Chung, Shih-Hung Tsai, Kuo-Sheng Hung, Tien-Yao Chang, Feng-Yee Chang, Hung-Sheng Shang |
| <b>hCoV-19/Taiwan/TSGH-39/2021</b> | EPI_ISL_2693004 | TSGH-CP molecular lab | TSGH-CP molecular lab | Cherng-Lih Perng, Ming-Jr JIAN, Chih-Kai Chang, Jung-Chung Lin, Kuo-Ming Yeh, Chien-Wen Chen, Sheng-Kang Chiu, Hsing-Yi Chung, Shih-Hung Tsai, Kuo-Sheng Hung, Tien-Yao Chang, Feng-Yee Chang, Hung-Sheng Shang |
| <b>hCoV-19/Taiwan/TSGH-38/2021</b> | EPI_ISL_458029  | TSGH-CP molecular lab | TSGH-CP molecular lab | Cherng-Lih Perng, Ming-Jr JIAN, Chih-Kai Chang, Jung-Chung Lin, Kuo-Ming Yeh, Chien-Wen Chen, Sheng-Kang Chiu, Hsing-Yi Chung, Shih-Hung Tsai, Kuo-Sheng Hung, Tien-Yao Chang, Feng-Yee Chang, Hung-Sheng Shang |

|                             |                |                       |                       |                                                                                                                                                                                                                 |
|-----------------------------|----------------|-----------------------|-----------------------|-----------------------------------------------------------------------------------------------------------------------------------------------------------------------------------------------------------------|
| hCoV-19/Taiwan/TSGH-37/2020 | EPI_ISL_457733 | TSGH-CP molecular lab | TSGH-CP molecular lab | Cherng-Lih Perng, Ming-Jr JIAN, Chih-Kai Chang, Jung-Chung Lin, Kuo-Ming Yeh, Chien-Wen Chen, Sheng-Kang Chiu, Hsing-Yi Chung, Shih-Hung Tsai, Kuo-Sheng Hung, Tien-Yao Chang, Feng-Yee Chang, Hung-Sheng Shang |
| hCoV-19/Taiwan/TSGH-36/2020 | EPI_ISL_457730 | TSGH-CP molecular lab | TSGH-CP molecular lab | Cherng-Lih Perng, Ming-Jr JIAN, Chih-Kai Chang, Jung-Chung Lin, Kuo-Ming Yeh, Chien-Wen Chen, Sheng-Kang Chiu, Hsing-Yi Chung, Shih-Hung Tsai, Kuo-Sheng Hung, Tien-Yao Chang, Feng-Yee Chang, Hung-Sheng Shang |
| hCoV-19/Taiwan/TSGH-34/2020 | EPI_ISL_447593 | TSGH-CP molecular lab | TSGH-CP molecular lab | Cherng-Lih Perng, Ming-Jr JIAN, Chih-Kai Chang, Jung-Chung Lin, Kuo-Ming Yeh, Chien-Wen Chen, Sheng-Kang Chiu, Hsing-Yi Chung, Shih-Hung Tsai, Kuo-Sheng Hung, Tien-Yao Chang, Feng-Yee Chang, Hung-Sheng Shang |
| hCoV-19/Taiwan/TSGH-33/2020 | EPI_ISL_447592 | TSGH-CP molecular lab | TSGH-CP molecular lab | Cherng-Lih Perng, Ming-Jr JIAN, Chih-Kai Chang, Jung-Chung Lin, Kuo-Ming Yeh, Chien-Wen Chen, Sheng-Kang Chiu, Hsing-Yi Chung, Shih-Hung Tsai, Kuo-Sheng Hung, Tien-Yao Chang, Feng-Yee Chang, Hung-Sheng Shang |
| hCoV-19/Taiwan/TSGH-32/2020 | EPI_ISL_447591 | TSGH-CP molecular lab | TSGH-CP molecular lab | Cherng-Lih Perng, Ming-Jr JIAN, Chih-Kai Chang, Jung-Chung Lin, Kuo-Ming Yeh, Chien-Wen Chen, Sheng-Kang Chiu, Hsing-Yi Chung, Shih-Hung Tsai, Kuo-Sheng Hung, Tien-Yao Chang, Feng-Yee Chang, Hung-Sheng Shang |
| hCoV-19/Taiwan/TSGH-30/2020 | EPI_ISL_447256 | TSGH-CP molecular lab | TSGH-CP molecular lab | Cherng-Lih Perng, Ming-Jr JIAN, Chih-Kai Chang, Jung-Chung Lin, Kuo-Ming Yeh, Chien-Wen Chen, Sheng-Kang Chiu, Hsing-Yi Chung, Shih-Hung Tsai, Kuo-Sheng Hung, Tien-Yao Chang, Feng-Yee Chang, Hung-Sheng Shang |
| hCoV-19/Taiwan/TSGH-29/2020 | EPI_ISL_447255 | TSGH-CP molecular lab | TSGH-CP molecular lab | Cherng-Lih Perng, Ming-Jr JIAN, Chih-Kai Chang, Jung-Chung Lin, Kuo-Ming Yeh, Chien-Wen Chen, Sheng-Kang Chiu, Hsing-Yi Chung, Shih-Hung Tsai, Kuo-Sheng Hung, Tien-Yao Chang, Feng-Yee Chang, Hung-Sheng Shang |
| hCoV-19/Taiwan/TSGH-28/2020 | EPI_ISL_447254 | TSGH-CP molecular lab | TSGH-CP molecular lab | Cherng-Lih Perng, Ming-Jr JIAN, Chih-Kai Chang, Jung-Chung Lin, Kuo-Ming                                                                                                                                        |

|                                    |                |                                                                                |                                                                                |                                                                                                                                                                                                                 |
|------------------------------------|----------------|--------------------------------------------------------------------------------|--------------------------------------------------------------------------------|-----------------------------------------------------------------------------------------------------------------------------------------------------------------------------------------------------------------|
|                                    |                |                                                                                |                                                                                | Yeh, Chien-Wen Chen, Sheng-Kang Chiu, Hsing-Yi Chung, Shih-Hung Tsai, Kuo-Sheng Hung, Tien-Yao Chang, Feng-Yee Chang, Hung-Sheng Shang                                                                          |
| <b>hCoV-19/Taiwan/TSGH-26/2020</b> | EPI_ISL_447252 | TSGH-CP molecular lab                                                          | TSGH-CP molecular lab                                                          | Cherng-Lih Perng, Ming-Jr JIAN, Chih-Kai Chang, Jung-Chung Lin, Kuo-Ming Yeh, Chien-Wen Chen, Sheng-Kang Chiu, Hsing-Yi Chung, Shih-Hung Tsai, Kuo-Sheng Hung, Tien-Yao Chang, Feng-Yee Chang, Hung-Sheng Shang |
| <b>hCoV-19/Taiwan/TSGH-25/2020</b> | EPI_ISL_437336 | TSGH-CP molecular lab, Division of Clinical Pathology, Department of Pathology | TSGH-CP molecular lab, Division of Clinical Pathology, Department of Pathology | Cherng-Lih Perng, Ming-Jr JIAN, Chih-Kai Chang, Jung-Chung Lin, Kuo-Ming Yeh, Chien-Wen Chen, Sheng-Kang Chiu, Hsing-Yi Chung, Shih-Hung Tsai, Kuo-Sheng Hung, Tien-Yao Chang, Feng-Yee Chang, Hung-Sheng Shang |
| <b>hCoV-19/Taiwan/TSGH-24/2020</b> | EPI_ISL_436099 | TSGH-CP molecular lab                                                          | TSGH-CP molecular lab                                                          | Cherng-Lih Perng, Ming-Jr JIAN, Chih-Kai Chang, Jung-Chung Lin, Kuo-Ming Yeh, Chien-Wen Chen, Sheng-Kang Chiu, Hsing-Yi Chung, Shih-Hung Tsai, Kuo-Sheng Hung, Tien-Yao Chang, Feng-Yee Chang, Hung-Sheng Shang |
| <b>hCoV-19/Taiwan/TSGH-23/2020</b> | EPI_ISL_436108 | TSGH-CP molecular lab                                                          | TSGH-CP molecular lab                                                          | Cherng-Lih Perng, Ming-Jr JIAN, Chih-Kai Chang, Jung-Chung Lin, Kuo-Ming Yeh, Chien-Wen Chen, Sheng-Kang Chiu, Hsing-Yi Chung, Shih-Hung Tsai, Kuo-Sheng Hung, Tien-Yao Chang, Feng-Yee Chang, Hung-Sheng Shang |
| <b>hCoV-19/Taiwan/TSGH-22/2020</b> | EPI_ISL_436107 | TSGH-CP molecular lab                                                          | TSGH-CP molecular lab                                                          | Cherng-Lih Perng, Ming-Jr JIAN, Chih-Kai Chang, Jung-Chung Lin, Kuo-Ming Yeh, Chien-Wen Chen, Sheng-Kang Chiu, Hsing-Yi Chung, Shih-Hung Tsai, Kuo-Sheng Hung, Tien-Yao Chang, Feng-Yee Chang, Hung-Sheng Shang |
| <b>hCoV-19/Taiwan/TSGH-21/2020</b> | EPI_ISL_436106 | TSGH-CP molecular lab                                                          | TSGH-CP molecular lab                                                          | Cherng-Lih Perng, Ming-Jr JIAN, Chih-Kai Chang, Jung-Chung Lin, Kuo-Ming Yeh, Chien-Wen Chen, Sheng-Kang Chiu, Hsing-Yi Chung, Shih-Hung Tsai, Kuo-Sheng Hung, Tien-Yao Chang, Feng-Yee Chang, Hung-Sheng Shang |
| <b>hCoV-19/Taiwan/TSGH-20/2020</b> | EPI_ISL_436105 | TSGH-CP molecular lab                                                          | TSGH-CP molecular lab                                                          | Cherng-Lih Perng, Ming-Jr JIAN, Chih-Kai Chang, Jung-Chung Lin, Kuo-Ming Yeh, Chien-Wen Chen, Sheng-Kang Chiu, Hsing-Yi Chung, Shih-Hung Tsai, Kuo-Sheng                                                        |

|                                              |                |                       |                       |                                                                                                                                                                                                                                            |
|----------------------------------------------|----------------|-----------------------|-----------------------|--------------------------------------------------------------------------------------------------------------------------------------------------------------------------------------------------------------------------------------------|
|                                              |                |                       |                       | Hung, Tien-Yao Chang,<br>Feng-Yee Chang, Hung-<br>Sheng Shang                                                                                                                                                                              |
| <b>hCoV-<br/>19/Taiwan/TSGH-<br/>19/2020</b> | EPI_ISL_436104 | TSGH-CP molecular lab | TSGH-CP molecular lab | Cherng-Lih Perng, Ming-Jr<br>JIAN, Chih-Kai Chang,<br>Jung-Chung Lin, Kuo-Ming<br>Yeh, Chien-Wen Chen,<br>Sheng-Kang Chiu, Hsing-Yi<br>Chung, Shih-Hung Tsai,<br>Kuo-Sheng Hung, Tien-Yao<br>Chang, Feng-Yee Chang,<br>Hung-Sheng Shang    |
| <b>hCoV-<br/>19/Taiwan/TSGH-<br/>17/2020</b> | EPI_ISL_436102 | TSGH-CP molecular lab | TSGH-CP molecular lab | Cherng-Lih Perng, Ming-Jr<br>JIAN, Chih-Kai Chang,<br>Jung-Chung Lin, Kuo-Ming<br>Yeh, Chien-Wen Chen,<br>Sheng-Kang Chiu, Hsing-Yi<br>Chung, Shih-Hung Tsai,<br>Kuo-Sheng Hung, Tien-Yao<br>Chang, Feng-Yee Chang,<br>Hung-Sheng Shang    |
| <b>hCoV-<br/>19/Taiwan/TSGH-<br/>16/2020</b> | EPI_ISL_436101 | TSGH-CP molecular lab | TSGH-CP molecular lab | Cherng-Lih Perng, Ming-Jr<br>JIAN, Chih-Kai Chang,<br>Jung-Chung Lin, Kuo-Ming<br>Yeh, Chien-Wen Chen,<br>Sheng-Kang Chiu, Hsing-Yi<br>Chung, Shih-Hung Tsai,<br>Kuo-Sheng Hung, Tien-Yao<br>Chang, Feng-Yee Chang,<br>Hung-Sheng Shang    |
| <b>hCoV-<br/>19/Taiwan/TSGH-<br/>15/2020</b> | EPI_ISL_436100 | TSGH-CP molecular lab | TSGH-CP molecular lab | Cherng-Lih Perng, Ming-Jr<br>Jian, Chih-Kai Chang, Jung-<br>Chung Lin, Kuo-Ming Yeh,<br>Chien-Wen Chen, Sheng-<br>Kang Chiu, Hsing-Yi Chung,<br>Shih-Hung Tsai, Kuo-Sheng<br>Hung, Tien-Yao Chang,<br>Feng-Yee Chang, Hung-<br>Sheng Shang |
| <b>hCoV-<br/>19/Taiwan/TSGH-<br/>14/2020</b> | EPI_ISL_428231 | TSGH-CP molecular lab | TSGH-CP molecular lab | Cherng-Lih Perng, Ming-Jr<br>JIAN, Chih-Kai Chang,<br>Jung-Chung Lin, Kuo-Ming<br>Yeh, Chien-Wen Chen,<br>Sheng-Kang Chiu, Hsing-Yi<br>Chung, Shih-Hung Tsai,<br>Kuo-Sheng Hung, Tien-Yao<br>Chang, Feng-Yee Chang,<br>Hung-Sheng Shang    |
| <b>hCoV-<br/>19/Taiwan/TSGH-<br/>13/2020</b> | EPI_ISL_428230 | TSGH-CP molecular lab | TSGH-CP molecular lab | Cherng-Lih Perng, Ming-Jr<br>Jian, Chih-Kai Chang, Jung-<br>Chung Lin, Kuo-Ming Yeh,<br>Chien-Wen Chen, Sheng-<br>Kang Chiu, Hsing-Yi Chung,<br>Shih-Hung Tsai, Kuo-Sheng<br>Hung, Tien-Yao Chang,<br>Feng-Yee Chang, Hung-<br>Sheng Shang |
| <b>hCoV-<br/>19/Taiwan/TSGH-<br/>12/2020</b> | EPI_ISL_428229 | TSGH-CP molecular lab | TSGH-CP molecular lab | Cherng-Lih Perng, Ming-Jr<br>Jian, Chih-Kai Chang, Jung-<br>Chung Lin, Kuo-Ming Yeh,<br>Chien-Wen Chen, Sheng-<br>Kang Chiu, Hsing-Yi Chung,<br>Shih-Hung Tsai, Kuo-Sheng<br>Hung, Tien-Yao Chang,<br>Feng-Yee Chang, Hung-<br>Sheng Shang |

|                             |                |                       |                       |                                                                                                                                                                                                                 |
|-----------------------------|----------------|-----------------------|-----------------------|-----------------------------------------------------------------------------------------------------------------------------------------------------------------------------------------------------------------|
| hCoV-19/Taiwan/TSGH-11/2020 | EPI_ISL_427398 | TSGH-CP molecular lab | TSGH-CP molecular lab | Cherng-Lih Perng, Ming-Jr Jian, Chih-Kai Chang, Jung-Chung Lin, Kuo-Ming Yeh, Chien-Wen Chen, Sheng-Kang Chiu, Hsing-Yi Chung, Shih-Hung Tsai, Kuo-Sheng Hung, Tien-Yao Chang, Feng-Yee Chang, Hung-Sheng Shang |
| hCoV-19/Taiwan/TSGH-08/2020 | EPI_ISL_427395 | TSGH-CP molecular lab | TSGH-CP molecular lab | Cherng-Lih Perng, Ming-Jr Jian, Chih-Kai Chang, Jung-Chung Lin, Kuo-Ming Yeh, Chien-Wen Chen, Sheng-Kang Chiu, Hsing-Yi Chung, Shih-Hung Tsai, Kuo-Sheng Hung, Tien-Yao Chang, Feng-Yee Chang, Hung-Sheng Shang |
| hCoV-19/Taiwan/TSGH-07/2020 | EPI_ISL_427394 | TSGH-CP molecular lab | TSGH-CP molecular lab | Cherng-Lih Perng, Ming-Jr Jian, Chih-Kai Chang, Jung-Chung Lin, Kuo-Ming Yeh, Chien-Wen Chen, Sheng-Kang Chiu, Hsing-Yi Chung, Shih-Hung Tsai, Kuo-Sheng Hung, Tien-Yao Chang, Feng-Yee Chang, Hung-Sheng Shang |
| hCoV-19/Taiwan/TSGH-06/2020 | EPI_ISL_427393 | TSGH-CP molecular lab | TSGH-CP molecular lab | Cherng-Lih Perng, Ming-Jr Jian, Chih-Kai Chang, Jung-Chung Lin, Kuo-Ming Yeh, Chien-Wen Chen, Sheng-Kang Chiu, Hsing-Yi Chung, Shih-Hung Tsai, Kuo-Sheng Hung, Tien-Yao Chang, Feng-Yee Chang, Hung-Sheng Shang |
| hCoV-19/Taiwan/TSGH-05/2020 | EPI_ISL_427392 | TSGH-CP molecular lab | TSGH-CP molecular lab | Cherng-Lih Perng, Ming-Jr Jian, Chih-Kai Chang, Jung-Chung Lin, Kuo-Ming Yeh, Chien-Wen Chen, Sheng-Kang Chiu, Hsing-Yi Chung, Shih-Hung Tsai, Kuo-Sheng Hung, Tien-Yao Chang, Feng-Yee Chang, Hung-Sheng Shang |
| hCoV-19/Taiwan/TSGH-04/2020 | EPI_ISL_426632 | TSGH-CP molecular lab | TSGH-CP molecular lab | Cherng-Lih Perng, Ming-Jr Jian, Chih-Kai Chang, Jung-Chung Lin, Kuo-Ming Yeh, Chien-Wen Chen, Sheng-Kang Chiu, Hsing-Yi Chung, Shih-Hung Tsai, Kuo-Sheng Hung, Tien-Yao Chang, Feng-Yee Chang, Hung-Sheng Shang |
| hCoV-19/Taiwan/TSGH-02/2020 | EPI_ISL_426630 | TSGH-CP molecular lab | TSGH-CP molecular lab | Cherng-Lih Perng, Ming-Jr Jian, Chih-Kai Chang, Jung-Chung Lin, Kuo-Ming Yeh, Chien-Wen Chen, Sheng-Kang Chiu, Hsing-Yi Chung, Shih-Hung Tsai, Kuo-Sheng Hung, Feng-Yee Chang, Hung-Sheng Shang                 |
| hCoV-19/Taiwan/TSGH-01/2020 | EPI_ISL_426629 | TSGH-CP molecular lab | TSGH-CP molecular lab | Cherng-Lih Perng, Ming-Jr Jian, Chih-Kai Chang, Jung-Chung Lin, Kuo-Ming Yeh, Chien-Wen Chen, Sheng-                                                                                                            |

|                                  |                   |   |                                                                        |                                                                                                   |                                                                                                                      |
|----------------------------------|-------------------|---|------------------------------------------------------------------------|---------------------------------------------------------------------------------------------------|----------------------------------------------------------------------------------------------------------------------|
|                                  |                   |   |                                                                        |                                                                                                   | Kang Chiu, Hsing-Yi Chung, Shih-Hung Tsai, Kuo-Sheng Hung, Feng-Yee Chang, Hung-Sheng Shang                          |
| <b>hCoV-19/Taiwan/NTU99/2021</b> | EPI_ISL_13 618354 | ? | Department of Laboratory Medicine, National Taiwan University Hospital | Department of Clinical Laboratory Sciences and Medical Biotechnology, National Taiwan University  | Shiou-Hwei Yeh, Hurng-Yi Wang, Sui-Yuan Chang                                                                        |
| <b>hCoV-19/Taiwan/NTU98/2021</b> | EPI_ISL_11333516  |   | Department of Laboratory Medicine, National Taiwan University Hospital | Department of Clinical Laboratory Sciences and Medical Biotechnology, National Taiwan University  | Sui-Yuan Chang                                                                                                       |
| <b>hCoV-19/Taiwan/NTU97/2021</b> | EPI_ISL_13 618353 | ? | Department of Laboratory Medicine, National Taiwan University Hospital | Department of Clinical Laboratory Sciences and Medical Biotechnology, National Taiwan University  | Shiou-Hwei Yeh, Hurng-Yi Wang, Sui-Yuan Chang                                                                        |
| <b>hCoV-19/Taiwan/NTU95/2021</b> | EPI_ISL_11333432  |   | Department of Laboratory Medicine, National Taiwan University Hospital | Department of Clinical Laboratory Sciences and Medical Biotechnology, National Taiwan University  | Sui-Yuan Chang                                                                                                       |
| <b>hCoV-19/Taiwan/NTU94/2021</b> | EPI_ISL_11333413  |   | Department of Laboratory Medicine, National Taiwan University Hospital | Department of Clinical Laboratory Sciences and Medical Biotechnology, National Taiwan University  | Sui-Yuan Chang                                                                                                       |
| <b>hCoV-19/Taiwan/NTU93/2021</b> | EPI_ISL_13 618352 | ? | Department of Laboratory Medicine, National Taiwan University Hospital | Department of Clinical Laboratory Sciences and Medical Biotechnology, National Taiwan University  | Shiou-Hwei Yeh, Hurng-Yi Wang, Sui-Yuan Chang                                                                        |
| <b>hCoV-19/Taiwan/NTU92/2021</b> | EPI_ISL_3979387   |   | Department of Laboratory Medicine, National Taiwan University Hospital | Microbial Genomics Core Lab, National Taiwan University Centers of Genomic and Precision Medicine | Shiou-Hwei Yeh, Hurng-Yi Wang, You-Yu Lin, Tzi-Yuan Wang, Ya-Yun Lai, Pei-Jer Chen, Shan-Chwen Chang, Sui-Yuan Chang |
| <b>hCoV-19/Taiwan/NTU91/2021</b> | EPI_ISL_11333514  |   | Department of Laboratory Medicine, National Taiwan University Hospital | Department of Clinical Laboratory Sciences and Medical Biotechnology, National Taiwan University  | Sui-Yuan Chang                                                                                                       |
| <b>hCoV-19/Taiwan/NTU90/2021</b> | EPI_ISL_13 618351 | ? | Department of Laboratory Medicine, National Taiwan University Hospital | Department of Clinical Laboratory Sciences and Medical Biotechnology, National Taiwan University  | Shiou-Hwei Yeh, Hurng-Yi Wang, Sui-Yuan Chang                                                                        |
| <b>hCoV-19/Taiwan/NTU88/2021</b> | EPI_ISL_11333411  |   | Department of Laboratory Medicine, National Taiwan University Hospital | Department of Clinical Laboratory Sciences and Medical Biotechnology, National Taiwan University  | Sui-Yuan Chang                                                                                                       |
| <b>hCoV-19/Taiwan/NTU87/2021</b> | EPI_ISL_13 618350 | ? | Department of Laboratory Medicine, National Taiwan University Hospital | Department of Clinical Laboratory Sciences and Medical Biotechnology, National Taiwan University  | Shiou-Hwei Yeh, Hurng-Yi Wang, Sui-Yuan Chang                                                                        |
| <b>hCoV-19/Taiwan/NTU86/2021</b> | EPI_ISL_13 618349 | ? | Department of Laboratory Medicine, National Taiwan University Hospital | Department of Clinical Laboratory Sciences and Medical Biotechnology, National Taiwan University  | Shiou-Hwei Yeh, Hurng-Yi Wang, Sui-Yuan Chang                                                                        |





|                                  |                  |   |                                                                        |                                                                                                   |                                                                                                       |
|----------------------------------|------------------|---|------------------------------------------------------------------------|---------------------------------------------------------------------------------------------------|-------------------------------------------------------------------------------------------------------|
| <b>hCoV-19/Taiwan/NTU72/2021</b> | EPI_ISL_13578732 | ? | Department of Laboratory Medicine, National Taiwan University Hospital | Department of Clinical Laboratory Sciences and Medical Biotechnology, National Taiwan University  | Shiou-Hwei Yeh, Hurng-Yi Wang, Sui-Yuan Chang                                                         |
| <b>hCoV-19/Taiwan/NTU71/2021</b> | EPI_ISL_13578731 | ? | Department of Laboratory Medicine, National Taiwan University Hospital | Department of Clinical Laboratory Sciences and Medical Biotechnology, National Taiwan University  | Shiou-Hwei Yeh, Hurng-Yi Wang, Sui-Yuan Chang                                                         |
| <b>hCoV-19/Taiwan/NTU70/2021</b> | EPI_ISL_13578730 | ? | Department of Laboratory Medicine, National Taiwan University Hospital | Department of Clinical Laboratory Sciences and Medical Biotechnology, National Taiwan University  | Shiou-Hwei Yeh, Hurng-Yi Wang, Sui-Yuan Chang                                                         |
| <b>hCoV-19/Taiwan/NTU69/2021</b> | EPI_ISL_13578729 | ? | Department of Laboratory Medicine, National Taiwan University Hospital | Department of Clinical Laboratory Sciences and Medical Biotechnology, National Taiwan University  | Shiou-Hwei Yeh, Hurng-Yi Wang, Sui-Yuan Chang                                                         |
| <b>hCoV-19/Taiwan/NTU68/2021</b> | EPI_ISL_13578728 | ? | Department of Laboratory Medicine, National Taiwan University Hospital | Department of Clinical Laboratory Sciences and Medical Biotechnology, National Taiwan University  | Shiou-Hwei Yeh, Hurng-Yi Wang, Sui-Yuan Chang                                                         |
| <b>hCoV-19/Taiwan/NTU67/2021</b> | EPI_ISL_13618360 | ? | Department of Laboratory Medicine, National Taiwan University Hospital | Department of Clinical Laboratory Sciences and Medical Biotechnology, National Taiwan University  | Shiou-Hwei Yeh, Hurng-Yi Wang, Sui-Yuan Chang                                                         |
| <b>hCoV-19/Taiwan/NTU66/2021</b> | EPI_ISL_13618344 | ? | Department of Laboratory Medicine, National Taiwan University Hospital | Department of Clinical Laboratory Sciences and Medical Biotechnology, National Taiwan University  | Shiou-Hwei Yeh, Hurng-Yi Wang, Sui-Yuan Chang                                                         |
| <b>hCoV-19/Taiwan/NTU63/2021</b> | EPI_ISL_13566006 | ? | Department of Laboratory Medicine, National Taiwan University Hospital | Department of Clinical Laboratory Sciences and Medical Biotechnology, National Taiwan University  | Shiou-Hwei Yeh, Hurng-Yi Wang, Sui-Yuan Chang                                                         |
| <b>hCoV-19/Taiwan/NTU62/2021</b> | EPI_ISL_1667475  |   | Department of Laboratory Medicine, National Taiwan University Hospital | Microbial Genomics Core Lab, National Taiwan University Centers of Genomic and Precision Medicine | Shiou-Hwei Yeh, You-Yu Lin, Ya-Yun Lai, Chiao-Ling Li, Shan-Chwen Chang, Pei-Jer Chen, Sui-Yuan Chang |
| <b>hCoV-19/Taiwan/NTU61/2021</b> | EPI_ISL_1667474  |   | Department of Laboratory Medicine, National Taiwan University Hospital | Microbial Genomics Core Lab, National Taiwan University Centers of Genomic and Precision Medicine | Shiou-Hwei Yeh, You-Yu Lin, Ya-Yun Lai, Chiao-Ling Li, Shan-Chwen Chang, Pei-Jer Chen, Sui-Yuan Chang |
| <b>hCoV-19/Taiwan/NTU60/2021</b> | EPI_ISL_1667472  |   | Department of Laboratory Medicine, National Taiwan University Hospital | Microbial Genomics Core Lab, National Taiwan University Centers of Genomic and Precision Medicine | Shiou-Hwei Yeh, You-Yu Lin, Ya-Yun Lai, Chiao-Ling Li, Shan-Chwen Chang, Pei-Jer Chen, Sui-Yuan Chang |
| <b>hCoV-19/Taiwan/NTU59/2021</b> | EPI_ISL_1667471  |   | Department of Laboratory Medicine, National Taiwan University Hospital | Microbial Genomics Core Lab, National Taiwan University Centers of Genomic and Precision Medicine | Shiou-Hwei Yeh, You-Yu Lin, Ya-Yun Lai, Chiao-Ling Li, Shan-Chwen Chang, Pei-Jer Chen, Sui-Yuan Chang |
| <b>hCoV-19/Taiwan/NTU58/2021</b> | EPI_ISL_1667469  |   | Department of Laboratory Medicine, National Taiwan University Hospital | Microbial Genomics Core Lab, National Taiwan University Centers of Genomic and Precision Medicine | Shiou-Hwei Yeh, You-Yu Lin, Ya-Yun Lai, Chiao-Ling Li, Shan-Chwen Chang, Pei-Jer Chen, Sui-Yuan Chang |





|                                   |                    |                                                                        |                                                                                                   |                                                                                                       |
|-----------------------------------|--------------------|------------------------------------------------------------------------|---------------------------------------------------------------------------------------------------|-------------------------------------------------------------------------------------------------------|
| <b>hCoV-19/Taiwan/NTU31/20</b>    | EPI_ISL_693302     | Department of Laboratory Medicine, National Taiwan University Hospital | Microbial Genomics Core Lab, National Taiwan University Centers of Genomic and Precision Medicine | Shiou-Hwei Yeh, You-Yu Lin, Ya-Yun Lai, Chiao-Ling Li, Shan-Chwen Chang, Pei-Jer Chen, Sui-Yuan Chang |
| <b>hCoV-19/Taiwan/NTU30/20</b>    | EPI_ISL_534336     | Department of Laboratory Medicine, National Taiwan University Hospital | Microbial Genomics Core Lab, National Taiwan University Centers of Genomic and Precision Medicine | Shiou-Hwei Yeh, You-Yu Lin, Ya-Yun Lai, Chiao-Ling Li, Shan-Chwen Chang, Pei-Jer Chen, Sui-Yuan Chang |
| <b>hCoV-19/Taiwan/NTU29/20</b>    | EPI_ISL_463007     | Department of Laboratory Medicine, National Taiwan University Hospital | Microbial Genomics Core Lab, National Taiwan University Centers of Genomic and Precision Medicine | Shiou-Hwei Yeh, You-Yu Lin, Ya-Yun Lai, Chiao-Ling Li, Shan-Chwen Chang, Pei-Jer Chen, Sui-Yuan Chang |
| <b>hCoV-19/Taiwan/NTU28/20</b>    | EPI_ISL_447622     | Department of Laboratory Medicine, National Taiwan University Hospital | Microbial Genomics Core Lab, National Taiwan University Centers of Genomic and Precision Medicine | Shiou-Hwei Yeh, You-Yu Lin, Ya-Yun Lai, Chiao-Ling Li, Shan-Chwen Chang, Pei-Jer Chen, Sui-Yuan Chang |
| <b>hCoV-19/Taiwan/NTU27/20</b>    | EPI_ISL_447621     | Department of Laboratory Medicine, National Taiwan University Hospital | Microbial Genomics Core Lab, National Taiwan University Centers of Genomic and Precision Medicine | Shiou-Hwei Yeh, You-Yu Lin, Ya-Yun Lai, Chiao-Ling Li, Shan-Chwen Chang, Pei-Jer Chen, Sui-Yuan Chang |
| <b>hCoV-19/Taiwan/NTU26/20</b>    | EPI_ISL_447620     | Department of Laboratory Medicine, National Taiwan University Hospital | Microbial Genomics Core Lab, National Taiwan University Centers of Genomic and Precision Medicine | Shiou-Hwei Yeh, You-Yu Lin, Ya-Yun Lai, Chiao-Ling Li, Shan-Chwen Chang, Pei-Jer Chen, Sui-Yuan Chang |
| <b>hCoV-19/Taiwan/NTU25/20</b>    | EPI_ISL_447619     | Department of Laboratory Medicine, National Taiwan University Hospital | Microbial Genomics Core Lab, National Taiwan University Centers of Genomic and Precision Medicine | Shiou-Hwei Yeh, You-Yu Lin, Ya-Yun Lai, Chiao-Ling Li, Shan-Chwen Chang, Pei-Jer Chen, Sui-Yuan Chang |
| <b>hCoV-19/Taiwan/NTU24/20</b>    | EPI_ISL_447618     | Department of Laboratory Medicine, National Taiwan University Hospital | Microbial Genomics Core Lab, National Taiwan University Centers of Genomic and Precision Medicine | Shiou-Hwei Yeh, You-Yu Lin, Ya-Yun Lai, Chiao-Ling Li, Shan-Chwen Chang, Pei-Jer Chen, Sui-Yuan Chang |
| <b>hCoV-19/Taiwan/NTU23/20</b>    | EPI_ISL_447617     | Department of Laboratory Medicine, National Taiwan University Hospital | Microbial Genomics Core Lab, National Taiwan University Centers of Genomic and Precision Medicine | Shiou-Hwei Yeh, You-Yu Lin, Ya-Yun Lai, Chiao-Ling Li, Shan-Chwen Chang, Pei-Jer Chen, Sui-Yuan Chang |
| <b>hCoV-19/Taiwan/NTU222/2022</b> | EPI_ISL_13949146 ? | Department of Laboratory Medicine, National Taiwan University Hospital | Department of Clinical Laboratory Sciences and Medical Biotechnology, National Taiwan University  | Shiou-Hwei Yeh, Hurng-Yi Wang, Sui-Yuan Chang                                                         |
| <b>hCoV-19/Taiwan/NTU221/2022</b> | EPI_ISL_13949145 ? | Department of Laboratory Medicine, National Taiwan University Hospital | Department of Clinical Laboratory Sciences and Medical Biotechnology, National Taiwan University  | Shiou-Hwei Yeh, Hurng-Yi Wang, Sui-Yuan Chang                                                         |
| <b>hCoV-19/Taiwan/NTU220/2022</b> | EPI_ISL_13949144 ? | Department of Laboratory Medicine, National Taiwan University Hospital | Department of Clinical Laboratory Sciences and Medical Biotechnology, National Taiwan University  | Shiou-Hwei Yeh, Hurng-Yi Wang, Sui-Yuan Chang                                                         |
| <b>hCoV-19/Taiwan/NTU22/20</b>    | EPI_ISL_447616     | Department of Laboratory Medicine, National Taiwan University Hospital | Microbial Genomics Core Lab, National Taiwan University Centers of Genomic and Precision Medicine | Shiou-Hwei Yeh, You-Yu Lin, Ya-Yun Lai, Chiao-Ling Li, Shan-Chwen Chang, Pei-Jer Chen, Sui-Yuan Chang |

|                                   |                  |   |                                                                        |                                                                                                   |                                                                                                       |
|-----------------------------------|------------------|---|------------------------------------------------------------------------|---------------------------------------------------------------------------------------------------|-------------------------------------------------------------------------------------------------------|
| <b>hCoV-19/Taiwan/NTU217/2022</b> | EPI_ISL_13949141 | ? | Department of Laboratory Medicine, National Taiwan University Hospital | Department of Clinical Laboratory Sciences and Medical Biotechnology, National Taiwan University  | Shiou-Hwei Yeh, Hurng-Yi Wang, Sui-Yuan Chang                                                         |
| <b>hCoV-19/Taiwan/NTU216/2022</b> | EPI_ISL_13949140 | ? | Department of Laboratory Medicine, National Taiwan University Hospital | Department of Clinical Laboratory Sciences and Medical Biotechnology, National Taiwan University  | Shiou-Hwei Yeh, Hurng-Yi Wang, Sui-Yuan Chang                                                         |
| <b>hCoV-19/Taiwan/NTU215/2022</b> | EPI_ISL_13949139 | ? | Department of Laboratory Medicine, National Taiwan University Hospital | Department of Clinical Laboratory Sciences and Medical Biotechnology, National Taiwan University  | Shiou-Hwei Yeh, Hurng-Yi Wang, Sui-Yuan Chang                                                         |
| <b>hCoV-19/Taiwan/NTU214/2022</b> | EPI_ISL_13949138 | ? | Department of Laboratory Medicine, National Taiwan University Hospital | Department of Clinical Laboratory Sciences and Medical Biotechnology, National Taiwan University  | Shiou-Hwei Yeh, Hurng-Yi Wang, Sui-Yuan Chang                                                         |
| <b>hCoV-19/Taiwan/NTU213/2022</b> | EPI_ISL_13949137 | ? | Department of Laboratory Medicine, National Taiwan University Hospital | Department of Clinical Laboratory Sciences and Medical Biotechnology, National Taiwan University  | Shiou-Hwei Yeh, Hurng-Yi Wang, Sui-Yuan Chang                                                         |
| <b>hCoV-19/Taiwan/NTU212/2022</b> | EPI_ISL_13949136 | ? | Department of Laboratory Medicine, National Taiwan University Hospital | Department of Clinical Laboratory Sciences and Medical Biotechnology, National Taiwan University  | Shiou-Hwei Yeh, Hurng-Yi Wang, Sui-Yuan Chang                                                         |
| <b>hCoV-19/Taiwan/NTU211/2022</b> | EPI_ISL_13949135 | ? | Department of Laboratory Medicine, National Taiwan University Hospital | Department of Clinical Laboratory Sciences and Medical Biotechnology, National Taiwan University  | Shiou-Hwei Yeh, Hurng-Yi Wang, Sui-Yuan Chang                                                         |
| <b>hCoV-19/Taiwan/NTU21/2020</b>  | EPI_ISL_422422   |   | Department of Laboratory Medicine, National Taiwan University Hospital | Microbial Genomics Core Lab, National Taiwan University Centers of Genomic and Precision Medicine | Shiou-Hwei Yeh, You-Yu Lin, Ya-Yun Lai, Chiao-Ling Li, Shan-Chwen Chang, Pei-Jer Chen, Sui-Yuan Chang |
| <b>hCoV-19/Taiwan/NTU209/2022</b> | EPI_ISL_13949133 | ? | Department of Laboratory Medicine, National Taiwan University Hospital | Department of Clinical Laboratory Sciences and Medical Biotechnology, National Taiwan University  | Shiou-Hwei Yeh, Hurng-Yi Wang, Sui-Yuan Chang                                                         |
| <b>hCoV-19/Taiwan/NTU208/2022</b> | EPI_ISL_13949132 | ? | Department of Laboratory Medicine, National Taiwan University Hospital | Department of Clinical Laboratory Sciences and Medical Biotechnology, National Taiwan University  | Shiou-Hwei Yeh, Hurng-Yi Wang, Sui-Yuan Chang                                                         |
| <b>hCoV-19/Taiwan/NTU207/2022</b> | EPI_ISL_13949131 | ? | Department of Laboratory Medicine, National Taiwan University Hospital | Department of Clinical Laboratory Sciences and Medical Biotechnology, National Taiwan University  | Shiou-Hwei Yeh, Hurng-Yi Wang, Sui-Yuan Chang                                                         |
| <b>hCoV-19/Taiwan/NTU206/2022</b> | EPI_ISL_13949130 | ? | Department of Laboratory Medicine, National Taiwan University Hospital | Department of Clinical Laboratory Sciences and Medical Biotechnology, National Taiwan University  | Shiou-Hwei Yeh, Hurng-Yi Wang, Sui-Yuan Chang                                                         |
| <b>hCoV-19/Taiwan/NTU205/2022</b> | EPI_ISL_13949129 | ? | Department of Laboratory Medicine, National Taiwan University Hospital | Department of Clinical Laboratory Sciences and Medical Biotechnology, National Taiwan University  | Shiou-Hwei Yeh, Hurng-Yi Wang, Sui-Yuan Chang                                                         |

|                                   |                    |                                                                        |                                                                                                   |                                                                                                       |
|-----------------------------------|--------------------|------------------------------------------------------------------------|---------------------------------------------------------------------------------------------------|-------------------------------------------------------------------------------------------------------|
| <b>hCoV-19/Taiwan/NTU204/2022</b> | EPI_ISL_13949128 ? | Department of Laboratory Medicine, National Taiwan University Hospital | Department of Clinical Laboratory Sciences and Medical Biotechnology, National Taiwan University  | Shiou-Hwei Yeh, Hurng-Yi Wang, Sui-Yuan Chang                                                         |
| <b>hCoV-19/Taiwan/NTU202/2022</b> | EPI_ISL_13949126 ? | Department of Laboratory Medicine, National Taiwan University Hospital | Department of Clinical Laboratory Sciences and Medical Biotechnology, National Taiwan University  | Shiou-Hwei Yeh, Hurng-Yi Wang, Sui-Yuan Chang                                                         |
| <b>hCoV-19/Taiwan/NTU20/2020</b>  | EPI_ISL_422421     | Department of Laboratory Medicine, National Taiwan University Hospital | Microbial Genomics Core Lab, National Taiwan University Centers of Genomic and Precision Medicine | Shiou-Hwei Yeh, You-Yu Lin, Ya-Yun Lai, Chiao-Ling Li, Shan-Chwen Chang, Pei-Jer Chen, Sui-Yuan Chang |
| <b>hCoV-19/Taiwan/NTU190/2022</b> | EPI_ISL_13356697   | Department of Laboratory Medicine, National Taiwan University Hospital | Department of Clinical Laboratory Sciences and Medical Biotechnology, National Taiwan University  | Shiou-Hwei Yeh, Hurng-Yi Wang, Sui-Yuan Chang                                                         |
| <b>hCoV-19/Taiwan/NTU19/2020</b>  | EPI_ISL_422420     | Department of Laboratory Medicine, National Taiwan University Hospital | Microbial Genomics Core Lab, National Taiwan University Centers of Genomic and Precision Medicine | Shiou-Hwei Yeh, You-Yu Lin, Ya-Yun Lai, Chiao-Ling Li, Shan-Chwen Chang, Pei-Jer Chen, Sui-Yuan Chang |
| <b>hCoV-19/Taiwan/NTU189/2022</b> | EPI_ISL_13356696   | Department of Laboratory Medicine, National Taiwan University Hospital | Department of Clinical Laboratory Sciences and Medical Biotechnology, National Taiwan University  | Shiou-Hwei Yeh, Hurng-Yi Wang, Sui-Yuan Chang                                                         |
| <b>hCoV-19/Taiwan/NTU188/2022</b> | EPI_ISL_13356695   | Department of Laboratory Medicine, National Taiwan University Hospital | Department of Clinical Laboratory Sciences and Medical Biotechnology, National Taiwan University  | Shiou-Hwei Yeh, Hurng-Yi Wang, Sui-Yuan Chang                                                         |
| <b>hCoV-19/Taiwan/NTU187/2022</b> | EPI_ISL_13356694 ? | Department of Laboratory Medicine, National Taiwan University Hospital | Department of Clinical Laboratory Sciences and Medical Biotechnology, National Taiwan University  | Shiou-Hwei Yeh, Hurng-Yi Wang, Sui-Yuan Chang                                                         |
| <b>hCoV-19/Taiwan/NTU181/2022</b> | EPI_ISL_13356693   | Department of Laboratory Medicine, National Taiwan University Hospital | Department of Clinical Laboratory Sciences and Medical Biotechnology, National Taiwan University  | Shiou-Hwei Yeh, Hurng-Yi Wang, Sui-Yuan Chang                                                         |
| <b>hCoV-19/Taiwan/NTU180/2022</b> | EPI_ISL_13356692   | Department of Laboratory Medicine, National Taiwan University Hospital | Department of Clinical Laboratory Sciences and Medical Biotechnology, National Taiwan University  | Shiou-Hwei Yeh, Hurng-Yi Wang, Sui-Yuan Chang                                                         |
| <b>hCoV-19/Taiwan/NTU18/2020</b>  | EPI_ISL_447615     | Department of Laboratory Medicine, National Taiwan University Hospital | Microbial Genomics Core Lab, National Taiwan University Centers of Genomic and Precision Medicine | Shiou-Hwei Yeh, You-Yu Lin, Ya-Yun Lai, Chiao-Ling Li, Shan-Chwen Chang, Pei-Jer Chen, Sui-Yuan Chang |
| <b>hCoV-19/Taiwan/NTU179/2022</b> | EPI_ISL_13026396   | Department of Laboratory Medicine, National Taiwan University Hospital | Department of Clinical Laboratory Sciences and Medical Biotechnology, National Taiwan University  | Shiou-Hwei Yeh, Hurng-Yi Wang, Sui-Yuan Chang                                                         |
| <b>hCoV-19/Taiwan/NTU178/2022</b> | EPI_ISL_13026394   | Department of Laboratory Medicine, National Taiwan University Hospital | Department of Clinical Laboratory Sciences and Medical Biotechnology, National Taiwan University  | Shiou-Hwei Yeh, Hurng-Yi Wang, Sui-Yuan Chang                                                         |

|                                   |                  |                                                                        |                                                                                                   |                                                                                                       |
|-----------------------------------|------------------|------------------------------------------------------------------------|---------------------------------------------------------------------------------------------------|-------------------------------------------------------------------------------------------------------|
| <b>hCoV-19/Taiwan/NTU177/2022</b> | EPI_ISL_13026392 | Department of Laboratory Medicine, National Taiwan University Hospital | Department of Clinical Laboratory Sciences and Medical Biotechnology, National Taiwan University  | Shiou-Hwei Yeh, Hurng-Yi Wang, Sui-Yuan Chang                                                         |
| <b>hCoV-19/Taiwan/NTU176/2022</b> | EPI_ISL_13026390 | Department of Laboratory Medicine, National Taiwan University Hospital | Department of Clinical Laboratory Sciences and Medical Biotechnology, National Taiwan University  | Shiou-Hwei Yeh, Hurng-Yi Wang, Sui-Yuan Chang                                                         |
| <b>hCoV-19/Taiwan/NTU175/2022</b> | EPI_ISL_13026387 | Department of Laboratory Medicine, National Taiwan University Hospital | Department of Clinical Laboratory Sciences and Medical Biotechnology, National Taiwan University  | Shiou-Hwei Yeh, Hurng-Yi Wang, Sui-Yuan Chang                                                         |
| <b>hCoV-19/Taiwan/NTU174/2022</b> | EPI_ISL_13026349 | Department of Laboratory Medicine, National Taiwan University Hospital | Department of Clinical Laboratory Sciences and Medical Biotechnology, National Taiwan University  | Shiou-Hwei Yeh, Hurng-Yi Wang, Sui-Yuan Chang                                                         |
| <b>hCoV-19/Taiwan/NTU173/2022</b> | EPI_ISL_13026317 | Department of Laboratory Medicine, National Taiwan University Hospital | Department of Clinical Laboratory Sciences and Medical Biotechnology, National Taiwan University  | Shiou-Hwei Yeh, Hurng-Yi Wang, Sui-Yuan Chang                                                         |
| <b>hCoV-19/Taiwan/NTU172/2022</b> | EPI_ISL_12892377 | Department of Laboratory Medicine, National Taiwan University Hospital | Department of Clinical Laboratory Sciences and Medical Biotechnology, National Taiwan University  | Shiou-Hwei Yeh, Hurng-Yi Wang, Sui-Yuan Chang                                                         |
| <b>hCoV-19/Taiwan/NTU17/2020</b>  | EPI_ISL_422419   | Department of Laboratory Medicine, National Taiwan University Hospital | Microbial Genomics Core Lab, National Taiwan University Centers of Genomic and Precision Medicine | Shiou-Hwei Yeh, You-Yu Lin, Ya-Yun Lai, Chiao-Ling Li, Shan-Chwen Chang, Pei-Jer Chen, Sui-Yuan Chang |
| <b>hCoV-19/Taiwan/NTU16/2020</b>  | EPI_ISL_422418   | Department of Laboratory Medicine, National Taiwan University Hospital | Microbial Genomics Core Lab, National Taiwan University Centers of Genomic and Precision Medicine | Shiou-Hwei Yeh, You-Yu Lin, Ya-Yun Lai, Chiao-Ling Li, Shan-Chwen Chang, Pei-Jer Chen, Sui-Yuan Chang |
| <b>hCoV-19/Taiwan/NTU15/2020</b>  | EPI_ISL_422417   | Department of Laboratory Medicine, National Taiwan University Hospital | Microbial Genomics Core Lab, National Taiwan University Centers of Genomic and Precision Medicine | Shiou-Hwei Yeh, You-Yu Lin, Ya-Yun Lai, Chiao-Ling Li, Shan-Chwen Chang, Pei-Jer Chen, Sui-Yuan Chang |
| <b>hCoV-19/Taiwan/NTU142/2022</b> | EPI_ISL_13105945 | Department of Laboratory Medicine, National Taiwan University Hospital | Department of Clinical Laboratory Sciences and Medical Biotechnology, National Taiwan University  | Shiou-Hwei Yeh, Hurng-Yi Wang, Sui-Yuan Chang                                                         |
| <b>hCoV-19/Taiwan/NTU14/2020</b>  | EPI_ISL_422416   | Department of Laboratory Medicine, National Taiwan University Hospital | Microbial Genomics Core Lab, National Taiwan University Centers of Genomic and Precision Medicine | Shiou-Hwei Yeh, You-Yu Lin, Ya-Yun Lai, Chiao-Ling Li, Shan-Chwen Chang, Pei-Jer Chen, Sui-Yuan Chang |
| <b>hCoV-19/Taiwan/NTU139/2022</b> | EPI_ISL_11302937 | Department of Laboratory Medicine, National Taiwan University Hospital | Department of Clinical Laboratory Sciences and Medical Biotechnology, National Taiwan University  | Shiou-Hwei Yeh, Hurng-Yi Wang, Sui-Yuan Chang                                                         |
| <b>hCoV-19/Taiwan/NTU138/2022</b> | EPI_ISL_11302936 | Department of Laboratory Medicine, National Taiwan University Hospital | Department of Clinical Laboratory Sciences and Medical Biotechnology, National Taiwan University  | Shiou-Hwei Yeh, Hurng-Yi Wang, Sui-Yuan Chang                                                         |

|                                   |                  |                                                                        |                                                                                                   |                                                                                                       |
|-----------------------------------|------------------|------------------------------------------------------------------------|---------------------------------------------------------------------------------------------------|-------------------------------------------------------------------------------------------------------|
| <b>hCoV-19/Taiwan/NTU137/2022</b> | EPI_ISL_11302895 | Department of Laboratory Medicine, National Taiwan University Hospital | Department of Clinical Laboratory Sciences and Medical Biotechnology, National Taiwan University  | Shiou-Hwei Yeh, Hurng-Yi Wang, Sui-Yuan Chang                                                         |
| <b>hCoV-19/Taiwan/NTU136/2022</b> | EPI_ISL_11302894 | Department of Laboratory Medicine, National Taiwan University Hospital | Department of Clinical Laboratory Sciences and Medical Biotechnology, National Taiwan University  | Shiou-Hwei Yeh, Hurng-Yi Wang, Sui-Yuan Chang                                                         |
| <b>hCoV-19/Taiwan/NTU135/2022</b> | EPI_ISL_11302893 | Department of Laboratory Medicine, National Taiwan University Hospital | Department of Clinical Laboratory Sciences and Medical Biotechnology, National Taiwan University  | Shiou-Hwei Yeh, Hurng-Yi Wang, Sui-Yuan Chang                                                         |
| <b>hCoV-19/Taiwan/NTU134/2022</b> | EPI_ISL_11302892 | Department of Laboratory Medicine, National Taiwan University Hospital | Department of Clinical Laboratory Sciences and Medical Biotechnology, National Taiwan University  | Shiou-Hwei Yeh, Hurng-Yi Wang, Sui-Yuan Chang                                                         |
| <b>hCoV-19/Taiwan/NTU133/2022</b> | EPI_ISL_11302891 | Department of Laboratory Medicine, National Taiwan University Hospital | Department of Clinical Laboratory Sciences and Medical Biotechnology, National Taiwan University  | Shiou-Hwei Yeh, Hurng-Yi Wang, Sui-Yuan Chang                                                         |
| <b>hCoV-19/Taiwan/NTU132/2022</b> | EPI_ISL_11302849 | Department of Laboratory Medicine, National Taiwan University Hospital | Department of Clinical Laboratory Sciences and Medical Biotechnology, National Taiwan University  | Shiou-Hwei Yeh, Hurng-Yi Wang, Sui-Yuan Chang                                                         |
| <b>hCoV-19/Taiwan/NTU130/2022</b> | EPI_ISL_11302804 | Department of Laboratory Medicine, National Taiwan University Hospital | Department of Clinical Laboratory Sciences and Medical Biotechnology, National Taiwan University  | Shiou-Hwei Yeh, Hurng-Yi Wang, Sui-Yuan Chang                                                         |
| <b>hCoV-19/Taiwan/NTU13/2020</b>  | EPI_ISL_422415   | Department of Laboratory Medicine, National Taiwan University Hospital | Microbial Genomics Core Lab, National Taiwan University Centers of Genomic and Precision Medicine | Shiou-Hwei Yeh, You-Yu Lin, Ya-Yun Lai, Chiao-Ling Li, Shan-Chwen Chang, Pei-Jer Chen, Sui-Yuan Chang |
| <b>hCoV-19/Taiwan/NTU129/2022</b> | EPI_ISL_11302740 | Department of Laboratory Medicine, National Taiwan University Hospital | Department of Clinical Laboratory Sciences and Medical Biotechnology, National Taiwan University  | Shiou-Hwei Yeh, Hurng-Yi Wang, Sui-Yuan Chang                                                         |
| <b>hCoV-19/Taiwan/NTU125/2021</b> | EPI_ISL_11333354 | Department of Laboratory Medicine, National Taiwan University Hospital | Department of Clinical Laboratory Sciences and Medical Biotechnology, National Taiwan University  | Sui-Yuan Chang                                                                                        |
| <b>hCoV-19/Taiwan/NTU124/2021</b> | EPI_ISL_11333351 | Department of Laboratory Medicine, National Taiwan University Hospital | Department of Clinical Laboratory Sciences and Medical Biotechnology, National Taiwan University  | Sui-Yuan Chang                                                                                        |
| <b>hCoV-19/Taiwan/NTU123/2021</b> | EPI_ISL_11362244 | Department of Laboratory Medicine, National Taiwan University Hospital | Department of Clinical Laboratory Sciences and Medical Biotechnology, National Taiwan University  | Sui-Yuan Chang                                                                                        |
| <b>hCoV-19/Taiwan/NTU120/2021</b> | EPI_ISL_11362242 | Department of Laboratory Medicine, National Taiwan University Hospital | Department of Clinical Laboratory Sciences and Medical Biotechnology, National Taiwan University  | Sui-Yuan Chang                                                                                        |



|                                   |                  |   |                                                                        |                                                                                                   |                                                                                                       |
|-----------------------------------|------------------|---|------------------------------------------------------------------------|---------------------------------------------------------------------------------------------------|-------------------------------------------------------------------------------------------------------|
| <b>hCoV-19/Taiwan/NTU12/20</b>    | EPI_ISL_422414   |   | Department of Laboratory Medicine, National Taiwan University Hospital | Microbial Genomics Core Lab, National Taiwan University Centers of Genomic and Precision Medicine | Shiou-Hwei Yeh, You-Yu Lin, Ya-Yun Lai, Chiao-Ling Li, Shan-Chwen Chang, Pei-Jer Chen, Sui-Yuan Chang |
| <b>hCoV-19/Taiwan/NTU118/2021</b> | EPI_ISL_13618359 | ? | Department of Laboratory Medicine, National Taiwan University Hospital | Department of Clinical Laboratory Sciences and Medical Biotechnology, National Taiwan University  | Shiou-Hwei Yeh, Hurng-Yi Wang, Sui-Yuan Chang                                                         |
| <b>hCoV-19/Taiwan/NTU117/2021</b> | EPI_ISL_11362241 |   | Department of Laboratory Medicine, National Taiwan University Hospital | Department of Clinical Laboratory Sciences and Medical Biotechnology, National Taiwan University  | Sui-Yuan Chang                                                                                        |
| <b>hCoV-19/Taiwan/NTU116/2021</b> | EPI_ISL_11333513 |   | Department of Laboratory Medicine, National Taiwan University Hospital | Department of Clinical Laboratory Sciences and Medical Biotechnology, National Taiwan University  | Sui-Yuan Chang                                                                                        |
| <b>hCoV-19/Taiwan/NTU115/2021</b> | EPI_ISL_13618358 | ? | Department of Laboratory Medicine, National Taiwan University Hospital | Department of Clinical Laboratory Sciences and Medical Biotechnology, National Taiwan University  | Shiou-Hwei Yeh, Hurng-Yi Wang, Sui-Yuan Chang                                                         |
| <b>hCoV-19/Taiwan/NTU114/2021</b> | EPI_ISL_13618357 | ? | Department of Laboratory Medicine, National Taiwan University Hospital | Department of Clinical Laboratory Sciences and Medical Biotechnology, National Taiwan University  | Shiou-Hwei Yeh, Hurng-Yi Wang, Sui-Yuan Chang                                                         |
| <b>hCoV-19/Taiwan/NTU113/2021</b> | EPI_ISL_11362240 |   | Department of Laboratory Medicine, National Taiwan University Hospital | Department of Clinical Laboratory Sciences and Medical Biotechnology, National Taiwan University  | Sui-Yuan Chang                                                                                        |
| <b>hCoV-19/Taiwan/NTU112/2021</b> | EPI_ISL_11362239 |   | Department of Laboratory Medicine, National Taiwan University Hospital | Department of Clinical Laboratory Sciences and Medical Biotechnology, National Taiwan University  | Sui-Yuan Chang                                                                                        |
| <b>hCoV-19/Taiwan/NTU111/2021</b> | EPI_ISL_11362238 |   | Department of Laboratory Medicine, National Taiwan University Hospital | Department of Clinical Laboratory Sciences and Medical Biotechnology, National Taiwan University  | Sui-Yuan Chang                                                                                        |
| <b>hCoV-19/Taiwan/NTU110/2021</b> | EPI_ISL_11362243 |   | Department of Laboratory Medicine, National Taiwan University Hospital | Department of Clinical Laboratory Sciences and Medical Biotechnology, National Taiwan University  | Sui-Yuan Chang                                                                                        |
| <b>hCoV-19/Taiwan/NTU11/2020</b>  | EPI_ISL_422413   |   | Department of Laboratory Medicine, National Taiwan University Hospital | Microbial Genomics Core Lab, National Taiwan University Centers of Genomic and Precision Medicine | Shiou-Hwei Yeh, You-Yu Lin, Ya-Yun Lai, Chiao-Ling Li, Shan-Chwen Chang, Pei-Jer Chen, Sui-Yuan Chang |
| <b>hCoV-19/Taiwan/NTU109/2021</b> | EPI_ISL_13618356 | ? | Department of Laboratory Medicine, National Taiwan University Hospital | Department of Clinical Laboratory Sciences and Medical Biotechnology, National Taiwan University  | Shiou-Hwei Yeh, Hurng-Yi Wang, Sui-Yuan Chang                                                         |
| <b>hCoV-19/Taiwan/NTU108/2021</b> | EPI_ISL_11333512 |   | Department of Laboratory Medicine, National Taiwan University Hospital | Department of Clinical Laboratory Sciences and Medical Biotechnology, National Taiwan University  | Sui-Yuan Chang                                                                                        |

|                                   |                    |                                                                        |                                                                                                   |                                                                                                       |
|-----------------------------------|--------------------|------------------------------------------------------------------------|---------------------------------------------------------------------------------------------------|-------------------------------------------------------------------------------------------------------|
| <b>hCoV-19/Taiwan/NTU107/2021</b> | EPI_ISL_11333511   | Department of Laboratory Medicine, National Taiwan University Hospital | Department of Clinical Laboratory Sciences and Medical Biotechnology, National Taiwan University  | Sui-Yuan Chang                                                                                        |
| <b>hCoV-19/Taiwan/NTU106/2021</b> | EPI_ISL_11362237   | Department of Laboratory Medicine, National Taiwan University Hospital | Department of Clinical Laboratory Sciences and Medical Biotechnology, National Taiwan University  | Sui-Yuan Chang                                                                                        |
| <b>hCoV-19/Taiwan/NTU105/2021</b> | EPI_ISL_11333510   | Department of Laboratory Medicine, National Taiwan University Hospital | Department of Clinical Laboratory Sciences and Medical Biotechnology, National Taiwan University  | Sui-Yuan Chang                                                                                        |
| <b>hCoV-19/Taiwan/NTU104/2021</b> | EPI_ISL_11333509   | Department of Laboratory Medicine, National Taiwan University Hospital | Department of Clinical Laboratory Sciences and Medical Biotechnology, National Taiwan University  | Sui-Yuan Chang                                                                                        |
| <b>hCoV-19/Taiwan/NTU103/2021</b> | EPI_ISL_11333517   | Department of Laboratory Medicine, National Taiwan University Hospital | Department of Clinical Laboratory Sciences and Medical Biotechnology, National Taiwan University  | Sui-Yuan Chang                                                                                        |
| <b>hCoV-19/Taiwan/NTU102/2021</b> | EPI_ISL_11333508   | Department of Laboratory Medicine, National Taiwan University Hospital | Department of Clinical Laboratory Sciences and Medical Biotechnology, National Taiwan University  | Sui-Yuan Chang                                                                                        |
| <b>hCoV-19/Taiwan/NTU101/2021</b> | EPI_ISL_11333507   | Department of Laboratory Medicine, National Taiwan University Hospital | Department of Clinical Laboratory Sciences and Medical Biotechnology, National Taiwan University  | Sui-Yuan Chang                                                                                        |
| <b>hCoV-19/Taiwan/NTU100/2021</b> | EPI_ISL_13618355 ? | Department of Laboratory Medicine, National Taiwan University Hospital | Department of Clinical Laboratory Sciences and Medical Biotechnology, National Taiwan University  | Shiou-Hwei Yeh, Hurng-Yi Wang, Sui-Yuan Chang                                                         |
| <b>hCoV-19/Taiwan/NTU10/2020</b>  | EPI_ISL_447614     | Department of Laboratory Medicine, National Taiwan University Hospital | Microbial Genomics Core Lab, National Taiwan University Centers of Genomic and Precision Medicine | Shiou-Hwei Yeh, You-Yu Lin, Ya-Yun Lai, Chiao-Ling Li, Shan-Chwen Chang, Pei-Jer Chen, Sui-Yuan Chang |
| <b>hCoV-19/Taiwan/NTU09/2020</b>  | EPI_ISL_422412     | Department of Laboratory Medicine, National Taiwan University Hospital | Microbial Genomics Core Lab, National Taiwan University Centers of Genomic and Precision Medicine | Shiou-Hwei Yeh, You-Yu Lin, Ya-Yun Lai, Chiao-Ling Li, Shan-Chwen Chang, Pei-Jer Chen, Sui-Yuan Chang |
| <b>hCoV-19/Taiwan/NTU08/2020</b>  | EPI_ISL_422411     | Department of Laboratory Medicine, National Taiwan University Hospital | Microbial Genomics Core Lab, National Taiwan University Centers of Genomic and Precision Medicine | Shiou-Hwei Yeh, You-Yu Lin, Ya-Yun Lai, Chiao-Ling Li, Shan-Chwen Chang, Pei-Jer Chen, Sui-Yuan Chang |
| <b>hCoV-19/Taiwan/NTU07/2020</b>  | EPI_ISL_422410     | Department of Laboratory Medicine, National Taiwan University Hospital | Microbial Genomics Core Lab, National Taiwan University Centers of Genomic and Precision Medicine | Shiou-Hwei Yeh, You-Yu Lin, Ya-Yun Lai, Chiao-Ling Li, Shan-Chwen Chang, Pei-Jer Chen, Sui-Yuan Chang |
| <b>hCoV-19/Taiwan/NTU06/2020</b>  | EPI_ISL_422409     | Department of Laboratory Medicine, National Taiwan University Hospital | Microbial Genomics Core Lab, National Taiwan University Centers of Genomic and Precision Medicine | Shiou-Hwei Yeh, You-Yu Lin, Ya-Yun Lai, Chiao-Ling Li, Shan-Chwen Chang, Pei-Jer Chen, Sui-Yuan Chang |

|                                      |                 |                                                                                |                                                                                                   |                                                                                                                                                                      |
|--------------------------------------|-----------------|--------------------------------------------------------------------------------|---------------------------------------------------------------------------------------------------|----------------------------------------------------------------------------------------------------------------------------------------------------------------------|
| <b>hCoV-19/Taiwan/NTU05/20</b>       | EPI_ISL_422408  | Department of Laboratory Medicine, National Taiwan University Hospital         | Microbial Genomics Core Lab, National Taiwan University Centers of Genomic and Precision Medicine | Shiou-Hwei Yeh, You-Yu Lin, Ya-Yun Lai, Chiao-Ling Li, Shan-Chwen Chang, Pei-Jer Chen, Sui-Yuan Chang                                                                |
| <b>hCoV-19/Taiwan/NTU04/20</b>       | EPI_ISL_422407  | Department of Laboratory Medicine, National Taiwan University Hospital         | Microbial Genomics Core Lab, National Taiwan University Centers of Genomic and Precision Medicine | Shiou-Hwei Yeh, You-Yu Lin, Ya-Yun Lai, Chiao-Ling Li, Shan-Chwen Chang, Pei-Jer Chen, Sui-Yuan Chang                                                                |
| <b>hCoV-19/Taiwan/NTU03/20</b>       | EPI_ISL_413592  | Department of Laboratory Medicine, National Taiwan University Hospital         | Microbial Genomics Core Lab, National Taiwan University Centers of Genomic and Precision Medicine | Shiou-Hwei Yeh, You-Yu Lin, Ya-Yun Lai, Chiao-Ling Li, Shan-Chwen Chang, Pei-Jer Chen, Sui-Yuan Chang                                                                |
| <b>hCoV-19/Taiwan/NTU02/20</b>       | EPI_ISL_410218  | Department of Laboratory Medicine, National Taiwan University Hospital         | Microbial Genomics Core Lab, National Taiwan University Centers of Genomic and Precision Medicine | Shiou-Hwei Yeh, You-Yu Lin, Ya-Yun Lai, Chiao-Ling Li, Shan-Chwen Chang, Pei-Jer Chen, Sui-Yuan Chang                                                                |
| <b>hCoV-19/Taiwan/NTU01/20</b>       | EPI_ISL_408489  | Department of Laboratory Medicine, National Taiwan University Hospital         | Microbial Genomics Core Lab, National Taiwan University Centers of Genomic and Precision Medicine | Shiou-Hwei Yeh, You-Yu Lin, Ya-Yun Lai, Chiao-Ling Li, Shan-Chwen Chang, Pei-Jer Chen, Sui-Yuan Chang                                                                |
| <b>hCoV-19/Taiwan/NCKUH-015/2020</b> | EPI_ISL_493208  | Virology Lab, Department of Pathology, National Cheng Kung University Hospital | Virology Lab, Department of Pathology, National Cheng Kung University Hospital                    | Huey-Pin Tsai et al                                                                                                                                                  |
| <b>hCoV-19/Taiwan/NCKUH-014/2020</b> | EPI_ISL_493207  | Virology Lab, Department of Pathology, National Cheng Kung University Hospital | Virology Lab, Department of Pathology, National Cheng Kung University Hospital                    | Huey-Pin Tsai, et al                                                                                                                                                 |
| <b>hCoV-19/Taiwan/NCKUH-012/2020</b> | EPI_ISL_493205  | Virology Lab, Department of Pathology, National Cheng Kung University Hospital | Virology Lab, Department of Pathology, National Cheng Kung University Hospital                    | Huey-Pin Tsai, et al                                                                                                                                                 |
| <b>hCoV-19/Taiwan/NCKUH-007/2020</b> | EPI_ISL_493202  | Virology Lab, Department of Pathology, National Cheng Kung University Hospital | Virology Lab, Department of Pathology, National Cheng Kung University Hospital                    | Huey-Pin Tsai, et al                                                                                                                                                 |
| <b>hCoV-19/Taiwan/NCKUH-006/2020</b> | EPI_ISL_493201  | Virology Lab, Department of Pathology, National Cheng Kung University Hospital | Virology Lab, Department of Pathology, National Cheng Kung University Hospital                    | Huey-Pin Tsai, et al                                                                                                                                                 |
| <b>hCoV-19/Taiwan/NCKUH-005/2020</b> | EPI_ISL_493200  | Virology Lab, Department of Pathology, National Cheng Kung University Hospital | Virology Lab, Department of Pathology, National Cheng Kung University Hospital                    | Huey-Pin Tsai, et al                                                                                                                                                 |
| <b>hCoV-19/Taiwan/NCKUH-003/2020</b> | EPI_ISL_493199  | Virology Lab, Department of Pathology, National Cheng Kung University Hospital | Virology Lab, Department of Pathology, National Cheng Kung University Hospital                    | Huey-Pin Tsai, et al                                                                                                                                                 |
| <b>hCoV-19/Taiwan/NCKUH-002/2020</b> | EPI_ISL_493198  | Virology Lab, Department of Pathology, National Cheng Kung University Hospital | Virology Lab, Department of Pathology, National Cheng Kung University Hospital                    | Huey-Pin Tsai, et al                                                                                                                                                 |
| <b>hCoV-19/Taiwan/KMUH-9/2021</b>    | EPI_ISL_8636668 | Dr. Jih-Jin Tsai                                                               | Dr. Jih-Jin Tsai                                                                                  | Ping-Chang Lin, Ching-Yi Tsai, Yan-Yi Tsai, Miao-Chen Hsu, Li-Teh Liu, Chun-Hong Chen, Wan-Long Chuang, Jer-Ming Chang, Shang-Jyh Hwang, Inn-Wen Chong, Jih-Jin Tsai |

|                                    |                  |                                                                                                    |                                                                                                    |                                                                                                                                                                                    |
|------------------------------------|------------------|----------------------------------------------------------------------------------------------------|----------------------------------------------------------------------------------------------------|------------------------------------------------------------------------------------------------------------------------------------------------------------------------------------|
| <b>hCoV-19/Taiwan/KMUH-8/2021</b>  | EPI_ISL_8636666  | Dr. Jih-Jin Tsai                                                                                   | Dr. Jih-Jin Tsai                                                                                   | Ping-Chang Lin, Ching-Yi Tsai, Yan-Yi Tsai, Miao-Chen Hsu, Li-Teh Liu, Chun-Hong Chen, Wan-Long Chuang, Jer-Ming Chang, Shang-Jyh Hwang, Inn-Wen Chong, Jih-Jin Tsai               |
| <b>hCoV-19/Taiwan/KMUH-7/2021</b>  | EPI_ISL_7016498  | Dr. Jih-Jin Tsai                                                                                   | Dr. Jih-Jin Tsai                                                                                   | Ping-Chang Lin, Ching-Yi Tsai, Yan-Yi Tsai, Miao-Chen Hsu, Li-Teh Liu, Chun-Hong Chen, Wan-Long Chuang, Jer-Ming Chang, Shang-Jyh Hwang, Inn-Wen Chong, Jih-Jin Tsai               |
| <b>hCoV-19/Taiwan/KMUH-6/2021</b>  | EPI_ISL_7016494  | Dr. Jih-Jin Tsai                                                                                   | Dr. Jih-Jin Tsai                                                                                   | Ping-Chang Lin, Ching-Yi Tsai, Yan-Yi Tsai, Miao-Chen Hsu, Li-Teh Liu, Chun-Hong Chen, Wan-Long Chuang, Jer-Ming Chang, Shang-Jyh Hwang, Inn-Wen Chong, Jih-Jin Tsai               |
| <b>hCoV-19/Taiwan/KMUH-5/2021</b>  | EPI_ISL_7016459  | Dr. Jih-Jin Tsai                                                                                   | Dr. Jih-Jin Tsai                                                                                   | Ping-Chang Lin, Ching-Yi Tsai, Yan-Yi Tsai, Miao-Chen Hsu, Li-Teh Liu, Chun-Hong Chen, Wan-Long Chuang, Jer-Ming Chang, Shang-Jyh Hwang, Inn-Wen Chong, Jih-Jin Tsai               |
| <b>hCoV-19/Taiwan/KMUH-4/2021</b>  | EPI_ISL_7016374  | Dr. Jih-Jin Tsai                                                                                   | Dr. Jih-Jin Tsai                                                                                   | Ping-Chang Lin, Ching-Yi Tsai, Yan-Yi Tsai, Miao-Chen Hsu, Li-Teh Liu, Chun-Hong Chen, Ko Chang, Wan-Long Chuang, Jer-Ming Chang, Shang-Jyh Hwang, Inn-Wen Chong, Jih-Jin Tsai     |
| <b>hCoV-19/Taiwan/KMUH-3/2021</b>  | EPI_ISL_5395633  | Dr. Jih-Jin Tsai                                                                                   | Dr. Jih-Jin Tsai                                                                                   | Ping-Chang Lin, Ching-Yi Tsai, Yan-Yi Tsai, Miao-Chen Hsu, Li-Teh Liu, Chun-Hong Chen, Wan-Long Chuang, Jer-Ming Chang, Shang-Jyh Hwang, Inn-Wen Chong, Jih-Jin Tsai               |
| <b>hCoV-19/Taiwan/KMUH-2/2021</b>  | EPI_ISL_5395635  | Dr. Jih-Jin Tsai                                                                                   | Dr. Jih-Jin Tsai                                                                                   | Ping-Chang Lin, Ching-Yi Tsai, Yan-Yi Tsai, Miao-Chen Hsu, Li-Teh Liu, Chun-Hong Chen, Wan-Long Chuang, Jer-Ming Chang, Shang-Jyh Hwang, Inn-Wen Chong, Jih-Jin Tsai               |
| <b>hCoV-19/Taiwan/KMUH-11/2022</b> | EPI_ISL_12005452 | Dr. Jih-Jin Tsai Tropical Medicine Center, Kaohsiung Medical University Chung-Ho Memorial Hospital | Dr. Jih-Jin Tsai Tropical Medicine Center, Kaohsiung Medical University Chung-Ho Memorial Hospital | Ping-Chang Lin, Ching-Yi Tsai, Yan-Yi Tsai, Miao-Chen Hsu, Li-Teh Liu, Chun-Hong Chen, Wan-Long Chuang, Jer-Ming Chang, Shang-Yi Lin, Shang-Jyh Hwang, Inn-Wen Chong, Jih-Jin Tsai |

|                                        |                  |                                                                                                    |                                                                                                    |                                                                                                                                                                                                                                    |
|----------------------------------------|------------------|----------------------------------------------------------------------------------------------------|----------------------------------------------------------------------------------------------------|------------------------------------------------------------------------------------------------------------------------------------------------------------------------------------------------------------------------------------|
| <b>hCoV-19/Taiwan/KMUH-10/2022</b>     | EPI_ISL_12005416 | Dr. Jih-Jin Tsai Tropical Medicine Center, Kaohsiung Medical University Chung-Ho Memorial Hospital | Dr. Jih-Jin Tsai Tropical Medicine Center, Kaohsiung Medical University Chung-Ho Memorial Hospital | Ping-Chang Lin, Ching-Yi Tsai, Yan-Yi Tsai, Miao-Chen Hsu, Li-Teh Liu, Chun-Hong Chen, Wan-Long Chuang, Jer-Ming Chang, Shang-Yi Lin, Siang-Jyh Hwang, Inn-Wen Chong, Jih-Jin Tsai                                                 |
| <b>hCoV-19/Taiwan/KMU-1/2020</b>       | EPI_ISL_4169856  | Dr. Chiaho Shih                                                                                    | Dr. Chiaho Shih                                                                                    | An-Ting Liou, Chih-Hsu Chang, Ping-Chang Lin, Yu-Chen Cheng, Ching-Yi Tsai, Wen-Chang Lin, Jeng-Yi Li, Mei-Yeh Jade Lu, Jer-Ming Chang, Shang-Jyh Hwang, Ming-Feng Hou, Inn-Wen Chong, Yuh-Jyh Jong, Jih-Jin Tsai, and Chiaho Shih |
| <b>hCoV-19/Taiwan/IPM-66/2022</b>      | EPI_ISL_13171423 | Institute of Preventive Medicine                                                                   | Institute of Preventive Medicine                                                                   | Chun-Hsiang Chiu, Li-Chen Yen, Yi-Chun Liu, Chuen-Mi, Yang, Yu-Hsiu Chang                                                                                                                                                          |
| <b>hCoV-19/Taiwan/IPM-63/2022</b>      | EPI_ISL_12097305 | Institute of Preventive Medicine                                                                   | Institute of Preventive Medicine                                                                   | Shu-Chen Hsu, Tein-Yao Chang, Ping-Cheng Liu, Hui-Ping Tsai, Shan-Ko Tsai, Cheng-Cheung Chen, Chun-Hsiang Chiu, Kuo-Ming Yeh, Yi-Jen Hung                                                                                          |
| <b>hCoV-19/Taiwan/CGMH-CGU-89/2021</b> | EPI_ISL_5160578  | Laboratory Medicine                                                                                | Department of Laboratory Medicine, Lin-Kou Chang Gung Memorial Hospital, Taoyuan, Taiwan           | Kuo-Chien Tsao, Yu-Nong Gong, Shu-Li Yang, Yi-Chun Liu, Chung-Guei Huang, Mei-Jen Hsiao, Po-Wei Huang, Cheng-Ta Yang, Cheng-Hsun Chiu, Peng-Nien Huang, Kuo-Ming Lee, Guang-Wu Chen, Shin-Ru Shih                                  |
| <b>hCoV-19/Taiwan/CGMH-CGU-88/2021</b> | EPI_ISL_5160574  | Laboratory Medicine                                                                                | Department of Laboratory Medicine, Lin-Kou Chang Gung Memorial Hospital, Taoyuan, Taiwan           | Kuo-Chien Tsao, Yu-Nong Gong, Shu-Li Yang, Yi-Chun Liu, Chung-Guei Huang, Mei-Jen Hsiao, Po-Wei Huang, Cheng-Ta Yang, Cheng-Hsun Chiu, Peng-Nien Huang, Kuo-Ming Lee, Guang-Wu Chen, Shin-Ru Shih                                  |
| <b>hCoV-19/Taiwan/CGMH-CGU-87/2021</b> | EPI_ISL_5160570  | Laboratory Medicine                                                                                | Department of Laboratory Medicine, Lin-Kou Chang Gung Memorial Hospital, Taoyuan, Taiwan           | Kuo-Chien Tsao, Yu-Nong Gong, Shu-Li Yang, Yi-Chun Liu, Chung-Guei Huang, Mei-Jen Hsiao, Po-Wei Huang, Cheng-Ta Yang, Cheng-Hsun Chiu, Peng-Nien Huang, Kuo-Ming Lee, Guang-Wu Chen, Shin-Ru Shih                                  |
| <b>hCoV-19/Taiwan/CGMH-CGU-86/2021</b> | EPI_ISL_5160569  | Laboratory Medicine                                                                                | Department of Laboratory Medicine, Lin-Kou Chang Gung Memorial Hospital, Taoyuan, Taiwan           | Kuo-Chien Tsao, Yu-Nong Gong, Shu-Li Yang, Yi-Chun Liu, Chung-Guei Huang, Mei-Jen Hsiao, Po-Wei Huang, Cheng-Ta Yang, Cheng-Hsun Chiu, Peng-Nien Huang, Kuo-Ming Lee, Guang-Wu Chen, Shin-Ru Shih                                  |
| <b>hCoV-19/Taiwan/CGMH-CGU-85/2021</b> | EPI_ISL_5160564  | Laboratory Medicine                                                                                | Department of Laboratory Medicine, Lin-Kou Chang Gung Memorial Hospital, Taoyuan, Taiwan           | Kuo-Chien Tsao, Yu-Nong Gong, Shu-Li Yang, Yi-Chun Liu, Chung-Guei Huang, Mei-Jen Hsiao, Po-                                                                                                                                       |

|                                        |                 |                                                                              |                                                                                          |  |                                                                                                                                                                                                   |
|----------------------------------------|-----------------|------------------------------------------------------------------------------|------------------------------------------------------------------------------------------|--|---------------------------------------------------------------------------------------------------------------------------------------------------------------------------------------------------|
|                                        |                 |                                                                              |                                                                                          |  | Wei Huang, Cheng-Ta Yang, Cheng-Hsun Chiu, Peng-Nien Huang, Kuo-Ming Lee, Guang-Wu Chen, Shin-Ru Shih                                                                                             |
| <b>hCoV-19/Taiwan/CGMH-CGU-84/2021</b> | EPI_ISL_5160563 | Laboratory Medicine                                                          | Department of Laboratory Medicine, Lin-Kou Chang Gung Memorial Hospital, Taoyuan, Taiwan |  | Kuo-Chien Tsao, Yu-Nong Gong, Shu-Li Yang, Yi-Chun Liu, Chung-Guei Huang, Mei-Jen Hsiao, Po-Wei Huang, Cheng-Ta Yang, Cheng-Hsun Chiu, Peng-Nien Huang, Kuo-Ming Lee, Guang-Wu Chen, Shin-Ru Shih |
| <b>hCoV-19/Taiwan/CGMH-CGU-83/2021</b> | EPI_ISL_5160559 | Laboratory Medicine                                                          | Department of Laboratory Medicine, Lin-Kou Chang Gung Memorial Hospital, Taoyuan, Taiwan |  | Kuo-Chien Tsao, Yu-Nong Gong, Shu-Li Yang, Yi-Chun Liu, Chung-Guei Huang, Mei-Jen Hsiao, Po-Wei Huang, Cheng-Ta Yang, Cheng-Hsun Chiu, Peng-Nien Huang, Kuo-Ming Lee, Guang-Wu Chen, Shin-Ru Shih |
| <b>hCoV-19/Taiwan/CGMH-CGU-82/2021</b> | EPI_ISL_5160556 | Laboratory Medicine                                                          | Department of Laboratory Medicine, Lin-Kou Chang Gung Memorial Hospital, Taoyuan, Taiwan |  | Kuo-Chien Tsao, Yu-Nong Gong, Shu-Li Yang, Yi-Chun Liu, Chung-Guei Huang, Mei-Jen Hsiao, Po-Wei Huang, Cheng-Ta Yang, Cheng-Hsun Chiu, Peng-Nien Huang, Kuo-Ming Lee, Guang-Wu Chen, Shin-Ru Shih |
| <b>hCoV-19/Taiwan/CGMH-CGU-81/2021</b> | EPI_ISL_5160551 | Laboratory Medicine                                                          | Department of Laboratory Medicine, Lin-Kou Chang Gung Memorial Hospital, Taoyuan, Taiwan |  | Kuo-Chien Tsao, Yu-Nong Gong, Shu-Li Yang, Yi-Chun Liu, Chung-Guei Huang, Mei-Jen Hsiao, Po-Wei Huang, Cheng-Ta Yang, Cheng-Hsun Chiu, Peng-Nien Huang, Kuo-Ming Lee, Guang-Wu Chen, Shin-Ru Shih |
| <b>hCoV-19/Taiwan/CGMH-CGU-80/2021</b> | EPI_ISL_5160476 | Laboratory Medicine                                                          | Department of Laboratory Medicine, Lin-Kou Chang Gung Memorial Hospital, Taoyuan, Taiwan |  | Kuo-Chien Tsao, Yu-Nong Gong, Shu-Li Yang, Yi-Chun Liu, Chung-Guei Huang, Mei-Jen Hsiao, Po-Wei Huang, Cheng-Ta Yang, Cheng-Hsun Chiu, Peng-Nien Huang, Kuo-Ming Lee, Guang-Wu Chen, Shin-Ru Shih |
| <b>hCoV-19/Taiwan/CGMH-CGU-79/2021</b> | EPI_ISL_5160472 | Laboratory Medicine                                                          | Department of Laboratory Medicine, Lin-Kou Chang Gung Memorial Hospital, Taoyuan, Taiwan |  | Kuo-Chien Tsao, Yu-Nong Gong, Shu-Li Yang, Yi-Chun Liu, Chung-Guei Huang, Mei-Jen Hsiao, Po-Wei Huang, Cheng-Ta Yang, Cheng-Hsun Chiu, Peng-Nien Huang, Kuo-Ming Lee, Guang-Wu Chen, Shin-Ru Shih |
| <b>hCoV-19/Taiwan/CGMH-CGU-73/2021</b> | EPI_ISL_2544714 | Research Center for Emerging Viral Infections, Chang Gung University, Taiwan | Research Center for Emerging Viral Infections, Chang Gung University, Taiwan             |  | Shin-Ru Shih, Yu-Nong Gong, Kuo-Ming Lee, Tsu-Lan Wu, Chung-Guei Huang, Shu-Li Yang, Po-Wei Huang, Hsiao-Chen Tu, Yung-Feng Lin, Hui-Ying Weng, Hung-Yu Shu,                                      |

|                                        |                 |                                                                              |                                                                              |                                                                                                                                                                                                                        |
|----------------------------------------|-----------------|------------------------------------------------------------------------------|------------------------------------------------------------------------------|------------------------------------------------------------------------------------------------------------------------------------------------------------------------------------------------------------------------|
|                                        |                 |                                                                              |                                                                              | Shih-Feng Tsai, Jason Su, Carol Wang, Pocky Lai, Jora Lin                                                                                                                                                              |
| <b>hCoV-19/Taiwan/CGMH-CGU-77/2021</b> | EPI_ISL_2544713 | Research Center for Emerging Viral Infections, Chang Gung University, Taiwan | Research Center for Emerging Viral Infections, Chang Gung University, Taiwan | Shin-Ru Shih, Yu-Nong Gong, Kuo-Ming Lee, Tsu-Lan Wu, Chung-Guei Huang, Shu-Li Yang, Po-Wei Huang, Hsiao-Chen Tu, Yung-Feng Lin, Hui-Ying Weng, Hung-Yu Shu, Shih-Feng Tsai, Jason Su, Carol Wang, Pocky Lai, Jora Lin |
| <b>hCoV-19/Taiwan/CGMH-CGU-76/2021</b> | EPI_ISL_2544712 | Research Center for Emerging Viral Infections, Chang Gung University, Taiwan | Research Center for Emerging Viral Infections, Chang Gung University, Taiwan | Shin-Ru Shih, Yu-Nong Gong, Kuo-Ming Lee, Tsu-Lan Wu, Chung-Guei Huang, Shu-Li Yang, Po-Wei Huang, Hsiao-Chen Tu, Yung-Feng Lin, Hui-Ying Weng, Hung-Yu Shu, Shih-Feng Tsai, Jason Su, Carol Wang, Pocky Lai, Jora Lin |
| <b>hCoV-19/Taiwan/CGMH-CGU-75/2021</b> | EPI_ISL_2544711 | Research Center for Emerging Viral Infections, Chang Gung University, Taiwan | Research Center for Emerging Viral Infections, Chang Gung University, Taiwan | Shin-Ru Shih, Yu-Nong Gong, Kuo-Ming Lee, Tsu-Lan Wu, Chung-Guei Huang, Shu-Li Yang, Po-Wei Huang, Hsiao-Chen Tu, Yung-Feng Lin, Hui-Ying Weng, Hung-Yu Shu, Shih-Feng Tsai, Jason Su, Carol Wang, Pocky Lai, Jora Lin |
| <b>hCoV-19/Taiwan/CGMH-CGU-74/2021</b> | EPI_ISL_2544710 | Research Center for Emerging Viral Infections, Chang Gung University, Taiwan | Research Center for Emerging Viral Infections, Chang Gung University, Taiwan | Shin-Ru Shih, Yu-Nong Gong, Kuo-Ming Lee, Tsu-Lan Wu, Chung-Guei Huang, Shu-Li Yang, Po-Wei Huang, Hsiao-Chen Tu, Yung-Feng Lin, Hui-Ying Weng, Hung-Yu Shu, Shih-Feng Tsai, Jason Su, Carol Wang, Pocky Lai, Jora Lin |
| <b>hCoV-19/Taiwan/CGMH-CGU-73/2021</b> | EPI_ISL_2544709 | Research Center for Emerging Viral Infections, Chang Gung University, Taiwan | Research Center for Emerging Viral Infections, Chang Gung University, Taiwan | Shin-Ru Shih, Yu-Nong Gong, Kuo-Ming Lee, Tsu-Lan Wu, Chung-Guei Huang, Shu-Li Yang, Po-Wei Huang, Hsiao-Chen Tu, Yung-Feng Lin, Hui-Ying Weng, Hung-Yu Shu, Shih-Feng Tsai, Jason Su, Carol Wang, Pocky Lai, Jora Lin |
| <b>hCoV-19/Taiwan/CGMH-CGU-72/2021</b> | EPI_ISL_2544708 | Research Center for Emerging Viral Infections, Chang Gung University, Taiwan | Research Center for Emerging Viral Infections, Chang Gung University, Taiwan | Shin-Ru Shih, Yu-Nong Gong, Kuo-Ming Lee, Tsu-Lan Wu, Chung-Guei Huang, Shu-Li Yang, Po-Wei Huang, Hsiao-Chen Tu, Yung-Feng Lin, Hui-Ying Weng, Hung-Yu Shu, Shih-Feng Tsai, Jason Su, Carol Wang, Pocky Lai, Jora Lin |
| <b>hCoV-19/Taiwan/CGMH-CGU-71/2021</b> | EPI_ISL_2544707 | Research Center for Emerging Viral Infections, Chang Gung University, Taiwan | Research Center for Emerging Viral Infections, Chang Gung University, Taiwan | Shin-Ru Shih, Yu-Nong Gong, Kuo-Ming Lee, Tsu-Lan Wu, Chung-Guei                                                                                                                                                       |

|                                        |                 |                                                                              |                                                                              |                                                                                                                                                                                                                        |
|----------------------------------------|-----------------|------------------------------------------------------------------------------|------------------------------------------------------------------------------|------------------------------------------------------------------------------------------------------------------------------------------------------------------------------------------------------------------------|
|                                        |                 | Infections, Chang Gung University, Taiwan                                    | Infections, Chang Gung University, Taiwan                                    | Huang, Shu-Li Yang, Po-Wei Huang, Hsiao-Chen Tu, Yung-Feng Lin, Hui-Ying Weng, Hung-Yu Shu, Shih-Feng Tsai, Jason Su, Carol Wang, Pocky Lai, Jora Lin                                                                  |
| <b>hCoV-19/Taiwan/CGMH-CGU-70/2021</b> | EPI_ISL_2544706 | Research Center for Emerging Viral Infections, Chang Gung University, Taiwan | Research Center for Emerging Viral Infections, Chang Gung University, Taiwan | Shin-Ru Shih, Yu-Nong Gong, Kuo-Ming Lee, Tsu-Lan Wu, Chung-Guei Huang, Shu-Li Yang, Po-Wei Huang, Hsiao-Chen Tu, Yung-Feng Lin, Hui-Ying Weng, Hung-Yu Shu, Shih-Feng Tsai, Jason Su, Carol Wang, Pocky Lai, Jora Lin |
| <b>hCoV-19/Taiwan/CGMH-CGU-69/2021</b> | EPI_ISL_2544705 | Research Center for Emerging Viral Infections, Chang Gung University, Taiwan | Research Center for Emerging Viral Infections, Chang Gung University, Taiwan | Shin-Ru Shih, Yu-Nong Gong, Kuo-Ming Lee, Tsu-Lan Wu, Chung-Guei Huang, Shu-Li Yang, Po-Wei Huang, Hsiao-Chen Tu, Yung-Feng Lin, Hui-Ying Weng, Hung-Yu Shu, Shih-Feng Tsai, Jason Su, Carol Wang, Pocky Lai, Jora Lin |
| <b>hCoV-19/Taiwan/CGMH-CGU-68/2021</b> | EPI_ISL_2544704 | Research Center for Emerging Viral Infections, Chang Gung University, Taiwan | Research Center for Emerging Viral Infections, Chang Gung University, Taiwan | Shin-Ru Shih, Yu-Nong Gong, Kuo-Ming Lee, Tsu-Lan Wu, Chung-Guei Huang, Shu-Li Yang, Po-Wei Huang, Hsiao-Chen Tu, Yung-Feng Lin, Hui-Ying Weng, Hung-Yu Shu, Shih-Feng Tsai, Jason Su, Carol Wang, Pocky Lai, Jora Lin |
| <b>hCoV-19/Taiwan/CGMH-CGU-67/2021</b> | EPI_ISL_2544703 | Research Center for Emerging Viral Infections, Chang Gung University, Taiwan | Research Center for Emerging Viral Infections, Chang Gung University, Taiwan | Shin-Ru Shih, Yu-Nong Gong, Kuo-Ming Lee, Tsu-Lan Wu, Chung-Guei Huang, Shu-Li Yang, Po-Wei Huang, Hsiao-Chen Tu, Yung-Feng Lin, Hui-Ying Weng, Hung-Yu Shu, Shih-Feng Tsai, Jason Su, Carol Wang, Pocky Lai, Jora Lin |
| <b>hCoV-19/Taiwan/CGMH-CGU-66/2021</b> | EPI_ISL_2544702 | Research Center for Emerging Viral Infections, Chang Gung University, Taiwan | Research Center for Emerging Viral Infections, Chang Gung University, Taiwan | Shin-Ru Shih, Yu-Nong Gong, Kuo-Ming Lee, Tsu-Lan Wu, Chung-Guei Huang, Shu-Li Yang, Po-Wei Huang, Hsiao-Chen Tu, Yung-Feng Lin, Hui-Ying Weng, Hung-Yu Shu, Shih-Feng Tsai, Jason Su, Carol Wang, Pocky Lai, Jora Lin |
| <b>hCoV-19/Taiwan/CGMH-CGU-65/2021</b> | EPI_ISL_2544701 | Research Center for Emerging Viral Infections, Chang Gung University, Taiwan | Research Center for Emerging Viral Infections, Chang Gung University, Taiwan | Shin-Ru Shih, Yu-Nong Gong, Kuo-Ming Lee, Tsu-Lan Wu, Chung-Guei Huang, Shu-Li Yang, Po-Wei Huang, Hsiao-Chen Tu, Yung-Feng Lin, Hui-Ying Weng, Hung-Yu Shu, Shih-Feng Tsai, Jason Su,                                 |



|                                        |                 |                                                                              |                                                                                          |                                                                                                                                                                                                                        |
|----------------------------------------|-----------------|------------------------------------------------------------------------------|------------------------------------------------------------------------------------------|------------------------------------------------------------------------------------------------------------------------------------------------------------------------------------------------------------------------|
|                                        |                 |                                                                              |                                                                                          | Carol Wang, Pocky Lai, Jora Lin                                                                                                                                                                                        |
| <b>hCoV-19/Taiwan/CGMH-CGU-64/2021</b> | EPI_ISL_2544700 | Research Center for Emerging Viral Infections, Chang Gung University, Taiwan | Research Center for Emerging Viral Infections, Chang Gung University, Taiwan             | Shin-Ru Shih, Yu-Nong Gong, Kuo-Ming Lee, Tsu-Lan Wu, Chung-Guei Huang, Shu-Li Yang, Po-Wei Huang, Hsiao-Chen Tu, Yung-Feng Lin, Hui-Ying Weng, Hung-Yu Shu, Shin-Feng Tsai, Jason Su, Carol Wang, Pocky Lai, Jora Lin |
| <b>hCoV-19/Taiwan/CGMH-CGU-63/2021</b> | EPI_ISL_2250184 | Laboratory Medicine                                                          | Department of Laboratory Medicine, Lin-Kou Chang Gung Memorial Hospital, Taoyuan, Taiwan | Kuo-Chien Tsao, Yu-Nong Gong, Shu-Li Yang, Yi-Chun Liu, Chung-Guei Huang, Mei-Jen Hsiao, Po-Wei Huang, Cheng-Ta Yang, Cheng-Hsun Chiu, Peng-Nien Huang, Kuo-Ming Lee, Guang-Wu Chen, Shin-Ru Shih                      |
| <b>hCoV-19/Taiwan/CGMH-CGU-62/2021</b> | EPI_ISL_2250152 | Laboratory Medicine                                                          | Department of Laboratory Medicine, Lin-Kou Chang Gung Memorial Hospital, Taoyuan, Taiwan | Kuo-Chien Tsao, Yu-Nong Gong, Shu-Li Yang, Yi-Chun Liu, Chung-Guei Huang, Mei-Jen Hsiao, Po-Wei Huang, Cheng-Ta Yang, Cheng-Hsun Chiu, Peng-Nien Huang, Kuo-Ming Lee, Guang-Wu Chen, Shin-Ru Shih                      |
| <b>hCoV-19/Taiwan/CGMH-CGU-61/2021</b> | EPI_ISL_2250151 | Laboratory Medicine                                                          | Department of Laboratory Medicine, Lin-Kou Chang Gung Memorial Hospital, Taoyuan, Taiwan | Kuo-Chien Tsao, Yu-Nong Gong, Shu-Li Yang, Yi-Chun Liu, Chung-Guei Huang, Mei-Jen Hsiao, Po-Wei Huang, Cheng-Ta Yang, Cheng-Hsun Chiu, Peng-Nien Huang, Kuo-Ming Lee, Guang-Wu Chen, Shin-Ru Shih                      |
| <b>hCoV-19/Taiwan/CGMH-CGU-60/2021</b> | EPI_ISL_2249836 | Laboratory Medicine                                                          | Department of Laboratory Medicine, Lin-Kou Chang Gung Memorial Hospital, Taoyuan, Taiwan | Kuo-Chien Tsao, Yu-Nong Gong, Shu-Li Yang, Yi-Chun Liu, Chung-Guei Huang, Mei-Jen Hsiao, Po-Wei Huang, Cheng-Ta Yang, Cheng-Hsun Chiu, Peng-Nien Huang, Kuo-Ming Lee, Guang-Wu Chen, Shin-Ru Shih                      |
| <b>hCoV-19/Taiwan/CGMH-CGU-59/2021</b> | EPI_ISL_2249653 | Laboratory Medicine                                                          | Department of Laboratory Medicine, Lin-Kou Chang Gung Memorial Hospital, Taoyuan, Taiwan | Kuo-Chien Tsao, Yu-Nong Gong, Shu-Li Yang, Yi-Chun Liu, Chung-Guei Huang, Mei-Jen Hsiao, Po-Wei Huang, Cheng-Ta Yang, Cheng-Hsun Chiu, Peng-Nien Huang, Kuo-Ming Lee, Guang-Wu Chen, Shin-Ru Shih                      |
| <b>hCoV-19/Taiwan/CGMH-CGU-58/2021</b> | EPI_ISL_2249597 | Laboratory Medicine                                                          | Department of Laboratory Medicine, Lin-Kou Chang Gung Memorial Hospital, Taoyuan, Taiwan | Kuo-Chien Tsao, Yu-Nong Gong, Shu-Li Yang, Yi-Chun Liu, Chung-Guei Huang, Mei-Jen Hsiao, Po-Wei Huang, Cheng-Ta Yang, Cheng-Hsun Chiu, Peng-Nien Huang, Kuo-Ming Lee, Guang-Wu Chen, Shin-Ru Shih                      |

|                                        |                 |                     |                                                                                          |                                                                                                                                                                                                   |
|----------------------------------------|-----------------|---------------------|------------------------------------------------------------------------------------------|---------------------------------------------------------------------------------------------------------------------------------------------------------------------------------------------------|
| <b>hCoV-19/Taiwan/CGMH-CGU-57/2021</b> | EPI_ISL_2249517 | Laboratory Medicine | Department of Laboratory Medicine, Lin-Kou Chang Gung Memorial Hospital, Taoyuan, Taiwan | Kuo-Chien Tsao, Yu-Nong Gong, Shu-Li Yang, Yi-Chun Liu, Chung-Guei Huang, Mei-Jen Hsiao, Po-Wei Huang, Cheng-Ta Yang, Cheng-Hsun Chiu, Peng-Nien Huang, Kuo-Ming Lee, Guang-Wu Chen, Shin-Ru Shih |
| <b>hCoV-19/Taiwan/CGMH-CGU-56/2021</b> | EPI_ISL_2249516 | Laboratory Medicine | Department of Laboratory Medicine, Lin-Kou Chang Gung Memorial Hospital, Taoyuan, Taiwan | Kuo-Chien Tsao, Yu-Nong Gong, Shu-Li Yang, Yi-Chun Liu, Chung-Guei Huang, Mei-Jen Hsiao, Po-Wei Huang, Cheng-Ta Yang, Cheng-Hsun Chiu, Peng-Nien Huang, Kuo-Ming Lee, Guang-Wu Chen, Shin-Ru Shih |
| <b>hCoV-19/Taiwan/CGMH-CGU-55/2021</b> | EPI_ISL_2249515 | Laboratory Medicine | Department of Laboratory Medicine, Lin-Kou Chang Gung Memorial Hospital, Taoyuan, Taiwan | Kuo-Chien Tsao, Yu-Nong Gong, Shu-Li Yang, Yi-Chun Liu, Chung-Guei Huang, Mei-Jen Hsiao, Po-Wei Huang, Cheng-Ta Yang, Cheng-Hsun Chiu, Peng-Nien Huang, Kuo-Ming Lee, Guang-Wu Chen, Shin-Ru Shih |
| <b>hCoV-19/Taiwan/CGMH-CGU-54/2021</b> | EPI_ISL_2249500 | Laboratory Medicine | Department of Laboratory Medicine, Lin-Kou Chang Gung Memorial Hospital, Taoyuan, Taiwan | Kuo-Chien Tsao, Yu-Nong Gong, Shu-Li Yang, Yi-Chun Liu, Chung-Guei Huang, Mei-Jen Hsiao, Po-Wei Huang, Cheng-Ta Yang, Cheng-Hsun Chiu, Peng-Nien Huang, Kuo-Ming Lee, Guang-Wu Chen, Shin-Ru Shih |
| <b>hCoV-19/Taiwan/CGMH-CGU-53/2021</b> | EPI_ISL_2249499 | Laboratory Medicine | Department of Laboratory Medicine, Lin-Kou Chang Gung Memorial Hospital, Taoyuan, Taiwan | Kuo-Chien Tsao, Yu-Nong Gong, Shu-Li Yang, Yi-Chun Liu, Chung-Guei Huang, Mei-Jen Hsiao, Po-Wei Huang, Cheng-Ta Yang, Cheng-Hsun Chiu, Peng-Nien Huang, Kuo-Ming Lee, Guang-Wu Chen, Shin-Ru Shih |
| <b>hCoV-19/Taiwan/CGMH-CGU-52/2021</b> | EPI_ISL_2249473 | Laboratory Medicine | Department of Laboratory Medicine, Lin-Kou Chang Gung Memorial Hospital, Taoyuan, Taiwan | Kuo-Chien Tsao, Yu-Nong Gong, Shu-Li Yang, Yi-Chun Liu, Chung-Guei Huang, Mei-Jen Hsiao, Po-Wei Huang, Cheng-Ta Yang, Cheng-Hsun Chiu, Peng-Nien Huang, Kuo-Ming Lee, Guang-Wu Chen, Shin-Ru Shih |
| <b>hCoV-19/Taiwan/CGMH-CGU-51/2020</b> | EPI_ISL_2249472 | Laboratory Medicine | Department of Laboratory Medicine, Lin-Kou Chang Gung Memorial Hospital, Taoyuan, Taiwan | Kuo-Chien Tsao, Yu-Nong Gong, Shu-Li Yang, Yi-Chun Liu, Chung-Guei Huang, Mei-Jen Hsiao, Po-Wei Huang, Cheng-Ta Yang, Cheng-Hsun Chiu, Peng-Nien Huang, Kuo-Ming Lee, Guang-Wu Chen, Shin-Ru Shih |
| <b>hCoV-19/Taiwan/CGMH-CGU-50/2021</b> | EPI_ISL_956331  | Laboratory Medicine | Department of Laboratory Medicine, Lin-Kou Chang                                         | Kuo-Chien Tsao, Yu-Nong Gong, Shu-Li Yang, Yi-Chun Liu, Chung-Guei                                                                                                                                |

|                                        |                |                     |                                                                                          |                                                                                                                                                                                                   |
|----------------------------------------|----------------|---------------------|------------------------------------------------------------------------------------------|---------------------------------------------------------------------------------------------------------------------------------------------------------------------------------------------------|
|                                        |                |                     | Gung Memorial Hospital, Taoyuan, Taiwan                                                  | Huang, Mei-Jen Hsiao, Po-Wei Huang, Cheng-Ta Yang, Cheng-Hsun Chiu, Peng-Nien Huang, Kuo-Ming Lee, Guang-Wu Chen, Shin-Ru Shih                                                                    |
| <b>hCoV-19/Taiwan/CGMH-CGU-49/2021</b> | EPI_ISL_956330 | Laboratory Medicine | Department of Laboratory Medicine, Lin-Kou Chang Gung Memorial Hospital, Taoyuan, Taiwan | Kuo-Chien Tsao, Yu-Nong Gong, Shu-Li Yang, Yi-Chun Liu, Chung-Guei Huang, Mei-Jen Hsiao, Po-Wei Huang, Cheng-Ta Yang, Cheng-Hsun Chiu, Peng-Nien Huang, Kuo-Ming Lee, Guang-Wu Chen, Shin-Ru Shih |
| <b>hCoV-19/Taiwan/CGMH-CGU-48/2021</b> | EPI_ISL_956329 | Laboratory Medicine | Department of Laboratory Medicine, Lin-Kou Chang Gung Memorial Hospital, Taoyuan, Taiwan | Kuo-Chien Tsao, Yu-Nong Gong, Shu-Li Yang, Yi-Chun Liu, Chung-Guei Huang, Mei-Jen Hsiao, Po-Wei Huang, Cheng-Ta Yang, Cheng-Hsun Chiu, Peng-Nien Huang, Kuo-Ming Lee, Guang-Wu Chen, Shin-Ru Shih |
| <b>hCoV-19/Taiwan/CGMH-CGU-47/2021</b> | EPI_ISL_956328 | Laboratory Medicine | Department of Laboratory Medicine, Lin-Kou Chang Gung Memorial Hospital, Taoyuan, Taiwan | Kuo-Chien Tsao, Yu-Nong Gong, Shu-Li Yang, Yi-Chun Liu, Chung-Guei Huang, Mei-Jen Hsiao, Po-Wei Huang, Cheng-Ta Yang, Cheng-Hsun Chiu, Peng-Nien Huang, Kuo-Ming Lee, Guang-Wu Chen, Shin-Ru Shih |
| <b>hCoV-19/Taiwan/CGMH-CGU-46/2021</b> | EPI_ISL_956327 | Laboratory Medicine | Department of Laboratory Medicine, Lin-Kou Chang Gung Memorial Hospital, Taoyuan, Taiwan | Kuo-Chien Tsao, Yu-Nong Gong, Shu-Li Yang, Yi-Chun Liu, Chung-Guei Huang, Mei-Jen Hsiao, Po-Wei Huang, Cheng-Ta Yang, Cheng-Hsun Chiu, Peng-Nien Huang, Kuo-Ming Lee, Guang-Wu Chen, Shin-Ru Shih |
| <b>hCoV-19/Taiwan/CGMH-CGU-45/2020</b> | EPI_ISL_956326 | Laboratory Medicine | Department of Laboratory Medicine, Lin-Kou Chang Gung Memorial Hospital, Taoyuan, Taiwan | Kuo-Chien Tsao, Yu-Nong Gong, Shu-Li Yang, Yi-Chun Liu, Chung-Guei Huang, Mei-Jen Hsiao, Po-Wei Huang, Cheng-Ta Yang, Cheng-Hsun Chiu, Peng-Nien Huang, Kuo-Ming Lee, Guang-Wu Chen, Shin-Ru Shih |
| <b>hCoV-19/Taiwan/CGMH-CGU-44/2020</b> | EPI_ISL_956325 | Laboratory Medicine | Department of Laboratory Medicine, Lin-Kou Chang Gung Memorial Hospital, Taoyuan, Taiwan | Kuo-Chien Tsao, Yu-Nong Gong, Shu-Li Yang, Yi-Chun Liu, Chung-Guei Huang, Mei-Jen Hsiao, Po-Wei Huang, Cheng-Ta Yang, Cheng-Hsun Chiu, Peng-Nien Huang, Kuo-Ming Lee, Guang-Wu Chen, Shin-Ru Shih |
| <b>hCoV-19/Taiwan/CGMH-CGU-43/2020</b> | EPI_ISL_956324 | Laboratory Medicine | Department of Laboratory Medicine, Lin-Kou Chang Gung Memorial Hospital, Taoyuan, Taiwan | Kuo-Chien Tsao, Yu-Nong Gong, Shu-Li Yang, Yi-Chun Liu, Chung-Guei Huang, Mei-Jen Hsiao, Po-Wei Huang, Cheng-Ta Yang, Cheng-Hsun Chiu,                                                            |

|                                        |                |                     |                                                                                          |  |                                                                                                                                                                                                   |
|----------------------------------------|----------------|---------------------|------------------------------------------------------------------------------------------|--|---------------------------------------------------------------------------------------------------------------------------------------------------------------------------------------------------|
|                                        |                |                     |                                                                                          |  | Peng-Nien Huang, Kuo-Ming Lee, Guang-Wu Chen, Shin-Ru Shih                                                                                                                                        |
| <b>hCoV-19/Taiwan/CGMH-CGU-42/2020</b> | EPI_ISL_956323 | Laboratory Medicine | Department of Laboratory Medicine, Lin-Kou Chang Gung Memorial Hospital, Taoyuan, Taiwan |  | Kuo-Chien Tsao, Yu-Nong Gong, Shu-Li Yang, Yi-Chun Liu, Chung-Guei Huang, Mei-Jen Hsiao, Po-Wei Huang, Cheng-Ta Yang, Cheng-Hsun Chiu, Peng-Nien Huang, Kuo-Ming Lee, Guang-Wu Chen, Shin-Ru Shih |
| <b>hCoV-19/Taiwan/CGMH-CGU-41/2020</b> | EPI_ISL_956322 | Laboratory Medicine | Department of Laboratory Medicine, Lin-Kou Chang Gung Memorial Hospital, Taoyuan, Taiwan |  | Kuo-Chien Tsao, Yu-Nong Gong, Shu-Li Yang, Yi-Chun Liu, Chung-Guei Huang, Mei-Jen Hsiao, Po-Wei Huang, Cheng-Ta Yang, Cheng-Hsun Chiu, Peng-Nien Huang, Kuo-Ming Lee, Guang-Wu Chen, Shin-Ru Shih |
| <b>hCoV-19/Taiwan/CGMH-CGU-40/2020</b> | EPI_ISL_956321 | Laboratory Medicine | Department of Laboratory Medicine, Lin-Kou Chang Gung Memorial Hospital, Taoyuan, Taiwan |  | Kuo-Chien Tsao, Yu-Nong Gong, Shu-Li Yang, Yi-Chun Liu, Chung-Guei Huang, Mei-Jen Hsiao, Po-Wei Huang, Cheng-Ta Yang, Cheng-Hsun Chiu, Peng-Nien Huang, Kuo-Ming Lee, Guang-Wu Chen, Shin-Ru Shih |
| <b>hCoV-19/Taiwan/CGMH-CGU-39/2020</b> | EPI_ISL_956320 | Laboratory Medicine | Department of Laboratory Medicine, Lin-Kou Chang Gung Memorial Hospital, Taoyuan, Taiwan |  | Kuo-Chien Tsao, Yu-Nong Gong, Shu-Li Yang, Yi-Chun Liu, Chung-Guei Huang, Mei-Jen Hsiao, Po-Wei Huang, Cheng-Ta Yang, Cheng-Hsun Chiu, Peng-Nien Huang, Kuo-Ming Lee, Guang-Wu Chen, Shin-Ru Shih |
| <b>hCoV-19/Taiwan/CGMH-CGU-38/2020</b> | EPI_ISL_956318 | Laboratory Medicine | Department of Laboratory Medicine, Lin-Kou Chang Gung Memorial Hospital, Taoyuan, Taiwan |  | Kuo-Chien Tsao, Yu-Nong Gong, Shu-Li Yang, Yi-Chun Liu, Chung-Guei Huang, Mei-Jen Hsiao, Po-Wei Huang, Cheng-Ta Yang, Cheng-Hsun Chiu, Peng-Nien Huang, Kuo-Ming Lee, Guang-Wu Chen, Shin-Ru Shih |
| <b>hCoV-19/Taiwan/CGMH-CGU-37/2020</b> | EPI_ISL_956317 | Laboratory Medicine | Department of Laboratory Medicine, Lin-Kou Chang Gung Memorial Hospital, Taoyuan, Taiwan |  | Kuo-Chien Tsao, Yu-Nong Gong, Shu-Li Yang, Yi-Chun Liu, Chung-Guei Huang, Mei-Jen Hsiao, Po-Wei Huang, Cheng-Ta Yang, Cheng-Hsun Chiu, Peng-Nien Huang, Kuo-Ming Lee, Guang-Wu Chen, Shin-Ru Shih |
| <b>hCoV-19/Taiwan/CGMH-CGU-36/2020</b> | EPI_ISL_667809 | Laboratory Medicine | Department of Laboratory Medicine, Lin-Kou Chang Gung Memorial Hospital, Taoyuan, Taiwan |  | Kuo-Chien Tsao, Yu-Nong Gong, Shu-Li Yang, Yi-Chun Liu, Chung-Guei Huang, Mei-Jen Hsiao, Po-Wei Huang, Cheng-Ta Yang, Cheng-Hsun Chiu, Peng-Nien Huang, Kuo-Ming Lee, Guang-Wu Chen, Shin-Ru Shih |

|                                        |                |                     |                                                                                          |                                                                                                                                                                                                   |
|----------------------------------------|----------------|---------------------|------------------------------------------------------------------------------------------|---------------------------------------------------------------------------------------------------------------------------------------------------------------------------------------------------|
| <b>hCoV-19/Taiwan/CGMH-CGU-35/2020</b> | EPI_ISL_667808 | Laboratory Medicine | Department of Laboratory Medicine, Lin-Kou Chang Gung Memorial Hospital, Taoyuan, Taiwan | Kuo-Chien Tsao, Yu-Nong Gong, Shu-Li Yang, Yi-Chun Liu, Chung-Guei Huang, Mei-Jen Hsiao, Po-Wei Huang, Cheng-Ta Yang, Cheng-Hsun Chiu, Peng-Nien Huang, Kuo-Ming Lee, Guang-Wu Chen, Shin-Ru Shih |
| <b>hCoV-19/Taiwan/CGMH-CGU-34/2020</b> | EPI_ISL_667807 | Laboratory Medicine | Department of Laboratory Medicine, Lin-Kou Chang Gung Memorial Hospital, Taoyuan, Taiwan | Kuo-Chien Tsao, Yu-Nong Gong, Shu-Li Yang, Yi-Chun Liu, Chung-Guei Huang, Mei-Jen Hsiao, Po-Wei Huang, Cheng-Ta Yang, Cheng-Hsun Chiu, Peng-Nien Huang, Kuo-Ming Lee, Guang-Wu Chen, Shin-Ru Shih |
| <b>hCoV-19/Taiwan/CGMH-CGU-33/2020</b> | EPI_ISL_660545 | Laboratory Medicine | Department of Laboratory Medicine, Lin-Kou Chang Gung Memorial Hospital, Taoyuan, Taiwan | Kuo-Chien Tsao, Yu-Nong Gong, Shu-Li Yang, Yi-Chun Liu, Chung-Guei Huang, Mei-Jen Hsiao, Po-Wei Huang, Cheng-Ta Yang, Cheng-Hsun Chiu, Peng-Nien Huang, Kuo-Ming Lee, Guang-Wu Chen, Shin-Ru Shih |
| <b>hCoV-19/Taiwan/CGMH-CGU-32/2020</b> | EPI_ISL_660544 | Laboratory Medicine | Department of Laboratory Medicine, Lin-Kou Chang Gung Memorial Hospital, Taoyuan, Taiwan | Kuo-Chien Tsao, Yu-Nong Gong, Shu-Li Yang, Yi-Chun Liu, Chung-Guei Huang, Mei-Jen Hsiao, Po-Wei Huang, Cheng-Ta Yang, Cheng-Hsun Chiu, Peng-Nien Huang, Kuo-Ming Lee, Guang-Wu Chen, Shin-Ru Shih |
| <b>hCoV-19/Taiwan/CGMH-CGU-31/2020</b> | EPI_ISL_660543 | Laboratory Medicine | Department of Laboratory Medicine, Lin-Kou Chang Gung Memorial Hospital, Taoyuan, Taiwan | Kuo-Chien Tsao, Yu-Nong Gong, Shu-Li Yang, Yi-Chun Liu, Chung-Guei Huang, Mei-Jen Hsiao, Po-Wei Huang, Cheng-Ta Yang, Cheng-Hsun Chiu, Peng-Nien Huang, Kuo-Ming Lee, Guang-Wu Chen, Shin-Ru Shih |
| <b>hCoV-19/Taiwan/CGMH-CGU-30/2020</b> | EPI_ISL_464094 | Laboratory Medicine | Department of Laboratory Medicine, Lin-Kou Chang Gung Memorial Hospital, Taoyuan, Taiwan | Kuo-Chien Tsao, Yu-Nong Gong, Shu-Li Yang, Yi-Chun Liu, Chung-Guei Huang, Mei-Jen Hsiao, Po-Wei Huang, Cheng-Ta Yang, Cheng-Hsun Chiu, Peng-Nien Huang, Kuo-Ming Lee, Guang-Wu Chen, Shin-Ru Shih |
| <b>hCoV-19/Taiwan/CGMH-CGU-29/2020</b> | EPI_ISL_464093 | Laboratory Medicine | Department of Laboratory Medicine, Lin-Kou Chang Gung Memorial Hospital, Taoyuan, Taiwan | Kuo-Chien Tsao, Yu-Nong Gong, Shu-Li Yang, Yi-Chun Liu, Chung-Guei Huang, Mei-Jen Hsiao, Po-Wei Huang, Cheng-Ta Yang, Cheng-Hsun Chiu, Peng-Nien Huang, Kuo-Ming Lee, Guang-Wu Chen, Shin-Ru Shih |
| <b>hCoV-19/Taiwan/CGMH-CGU-28/2020</b> | EPI_ISL_464092 | Laboratory Medicine | Department of Laboratory Medicine, Lin-Kou Chang Gung Memorial Hospital, Taoyuan, Taiwan | Kuo-Chien Tsao, Yu-Nong Gong, Shu-Li Yang, Yi-Chun Liu, Chung-Guei Huang, Mei-Jen Hsiao, Po-Wei Huang, Cheng-Ta Yang, Cheng-Hsun Chiu, Peng-Nien Huang, Kuo-Ming Lee, Guang-Wu Chen, Shin-Ru Shih |

|                                        |                |                     |                                                                                          |                                                                                                                                                                                                   |
|----------------------------------------|----------------|---------------------|------------------------------------------------------------------------------------------|---------------------------------------------------------------------------------------------------------------------------------------------------------------------------------------------------|
|                                        |                |                     | Gung Memorial Hospital, Taoyuan, Taiwan                                                  | Huang, Mei-Jen Hsiao, Po-Wei Huang, Cheng-Ta Yang, Cheng-Hsun Chiu, Peng-Nien Huang, Kuo-Ming Lee, Guang-Wu Chen, Shin-Ru Shih                                                                    |
| <b>hCoV-19/Taiwan/CGMH-CGU-27/2020</b> | EPI_ISL_452179 | Laboratory Medicine | Department of Laboratory Medicine, Lin-Kou Chang Gung Memorial Hospital, Taoyuan, Taiwan | Kuo-Chien Tsao, Yu-Nong Gong, Shu-Li Yang, Yi-Chun Liu, Chung-Guei Huang, Mei-Jen Hsiao, Po-Wei Huang, Cheng-Ta Yang, Cheng-Hsun Chiu, Peng-Nien Huang, Kuo-Ming Lee, Guang-Wu Chen, Shin-Ru Shih |
| <b>hCoV-19/Taiwan/CGMH-CGU-26/2020</b> | EPI_ISL_452178 | Laboratory Medicine | Department of Laboratory Medicine, Lin-Kou Chang Gung Memorial Hospital, Taoyuan, Taiwan | Kuo-Chien Tsao, Yu-Nong Gong, Shu-Li Yang, Yi-Chun Liu, Chung-Guei Huang, Mei-Jen Hsiao, Po-Wei Huang, Cheng-Ta Yang, Cheng-Hsun Chiu, Peng-Nien Huang, Kuo-Ming Lee, Guang-Wu Chen, Shin-Ru Shih |
| <b>hCoV-19/Taiwan/CGMH-CGU-25/2020</b> | EPI_ISL_444278 | Laboratory Medicine | Department of Laboratory Medicine, Lin-Kou Chang Gung Memorial Hospital, Taoyuan, Taiwan | Kuo-Chien Tsao, Yu-Nong Gong, Shu-Li Yang, Yi-Chun Liu, Chung-Guei Huang, Mei-Jen Hsiao, Po-Wei Huang, Cheng-Ta Yang, Cheng-Hsun Chiu, Peng-Nien Huang, Kuo-Ming Lee, Guang-Wu Chen, Shin-Ru Shih |
| <b>hCoV-19/Taiwan/CGMH-CGU-24/2020</b> | EPI_ISL_444277 | Laboratory Medicine | Department of Laboratory Medicine, Lin-Kou Chang Gung Memorial Hospital, Taoyuan, Taiwan | Kuo-Chien Tsao, Yu-Nong Gong, Shu-Li Yang, Yi-Chun Liu, Chung-Guei Huang, Mei-Jen Hsiao, Po-Wei Huang, Cheng-Ta Yang, Cheng-Hsun Chiu, Peng-Nien Huang, Kuo-Ming Lee, Guang-Wu Chen, Shin-Ru Shih |
| <b>hCoV-19/Taiwan/CGMH-CGU-23/2020</b> | EPI_ISL_444276 | Laboratory Medicine | Department of Laboratory Medicine, Lin-Kou Chang Gung Memorial Hospital, Taoyuan, Taiwan | Kuo-Chien Tsao, Yu-Nong Gong, Shu-Li Yang, Yi-Chun Liu, Chung-Guei Huang, Mei-Jen Hsiao, Po-Wei Huang, Cheng-Ta Yang, Cheng-Hsun Chiu, Peng-Nien Huang, Kuo-Ming Lee, Guang-Wu Chen, Shin-Ru Shih |
| <b>hCoV-19/Taiwan/CGMH-CGU-21/2020</b> | EPI_ISL_444274 | Laboratory Medicine | Department of Laboratory Medicine, Lin-Kou Chang Gung Memorial Hospital, Taoyuan, Taiwan | Kuo-Chien Tsao, Yu-Nong Gong, Shu-Li Yang, Yi-Chun Liu, Chung-Guei Huang, Mei-Jen Hsiao, Po-Wei Huang, Cheng-Ta Yang, Cheng-Hsun Chiu, Peng-Nien Huang, Kuo-Ming Lee, Guang-Wu Chen, Shin-Ru Shih |
| <b>hCoV-19/Taiwan/CGMH-CGU-20/2020</b> | EPI_ISL_424978 | Laboratory Medicine | Department of Laboratory Medicine, Lin-Kou Chang Gung Memorial Hospital, Taoyuan, Taiwan | Kuo-Chien Tsao, Yu-Nong Gong, Shu-Li Yang, Yi-Chun Liu, Chung-Guei Huang, Mei-Jen Hsiao, Po-Wei Huang, Cheng-Ta Yang, Cheng-Hsun Chiu,                                                            |

|                                        |                |                     |                                                                                          |  |                                                                                                                                                                                                   |
|----------------------------------------|----------------|---------------------|------------------------------------------------------------------------------------------|--|---------------------------------------------------------------------------------------------------------------------------------------------------------------------------------------------------|
|                                        |                |                     |                                                                                          |  | Peng-Nien Huang, Kuo-Ming Lee, Guang-Wu Chen, Shin-Ru Shih                                                                                                                                        |
| <b>hCoV-19/Taiwan/CGMH-CGU-19/2020</b> | EPI_ISL_424975 | Laboratory Medicine | Department of Laboratory Medicine, Lin-Kou Chang Gung Memorial Hospital, Taoyuan, Taiwan |  | Kuo-Chien Tsao, Yu-Nong Gong, Shu-Li Yang, Yi-Chun Liu, Chung-Guei Huang, Mei-Jen Hsiao, Po-Wei Huang, Cheng-Ta Yang, Cheng-Hsun Chiu, Peng-Nien Huang, Kuo-Ming Lee, Guang-Wu Chen, Shin-Ru Shih |
| <b>hCoV-19/Taiwan/CGMH-CGU-18/2020</b> | EPI_ISL_424974 | Laboratory Medicine | Department of Laboratory Medicine, Lin-Kou Chang Gung Memorial Hospital, Taoyuan, Taiwan |  | Kuo-Chien Tsao, Yu-Nong Gong, Shu-Li Yang, Yi-Chun Liu, Chung-Guei Huang, Mei-Jen Hsiao, Po-Wei Huang, Cheng-Ta Yang, Cheng-Hsun Chiu, Peng-Nien Huang, Kuo-Ming Lee, Guang-Wu Chen, Shin-Ru Shih |
| <b>hCoV-19/Taiwan/CGMH-CGU-17/2020</b> | EPI_ISL_424973 | Laboratory Medicine | Department of Laboratory Medicine, Lin-Kou Chang Gung Memorial Hospital, Taoyuan, Taiwan |  | Kuo-Chien Tsao, Yu-Nong Gong, Shu-Li Yang, Yi-Chun Liu, Chung-Guei Huang, Mei-Jen Hsiao, Po-Wei Huang, Cheng-Ta Yang, Cheng-Hsun Chiu, Peng-Nien Huang, Kuo-Ming Lee, Guang-Wu Chen, Shin-Ru Shih |
| <b>hCoV-19/Taiwan/CGMH-CGU-16/2020</b> | EPI_ISL_424972 | Laboratory Medicine | Department of Laboratory Medicine, Lin-Kou Chang Gung Memorial Hospital, Taoyuan, Taiwan |  | Kuo-Chien Tsao, Yu-Nong Gong, Shu-Li Yang, Yi-Chun Liu, Chung-Guei Huang, Mei-Jen Hsiao, Po-Wei Huang, Cheng-Ta Yang, Cheng-Hsun Chiu, Peng-Nien Huang, Kuo-Ming Lee, Guang-Wu Chen, Shin-Ru Shih |
| <b>hCoV-19/Taiwan/CGMH-CGU-15/2020</b> | EPI_ISL_424971 | Laboratory Medicine | Department of Laboratory Medicine, Lin-Kou Chang Gung Memorial Hospital, Taoyuan, Taiwan |  | Kuo-Chien Tsao, Yu-Nong Gong, Shu-Li Yang, Yi-Chun Liu, Chung-Guei Huang, Mei-Jen Hsiao, Po-Wei Huang, Cheng-Ta Yang, Cheng-Hsun Chiu, Peng-Nien Huang, Kuo-Ming Lee, Guang-Wu Chen, Shin-Ru Shih |
| <b>hCoV-19/Taiwan/CGMH-CGU-14/2020</b> | EPI_ISL_424970 | Laboratory Medicine | Department of Laboratory Medicine, Lin-Kou Chang Gung Memorial Hospital, Taoyuan, Taiwan |  | Kuo-Chien Tsao, Yu-Nong Gong, Shu-Li Yang, Yi-Chun Liu, Chung-Guei Huang, Mei-Jen Hsiao, Po-Wei Huang, Cheng-Ta Yang, Cheng-Hsun Chiu, Peng-Nien Huang, Kuo-Ming Lee, Guang-Wu Chen, Shin-Ru Shih |
| <b>hCoV-19/Taiwan/CGMH-CGU-13/2020</b> | EPI_ISL_424969 | Laboratory Medicine | Department of Laboratory Medicine, Lin-Kou Chang Gung Memorial Hospital, Taoyuan, Taiwan |  | Kuo-Chien Tsao, Yu-Nong Gong, Shu-Li Yang, Yi-Chun Liu, Chung-Guei Huang, Mei-Jen Hsiao, Po-Wei Huang, Cheng-Ta Yang, Cheng-Hsun Chiu, Peng-Nien Huang, Kuo-Ming Lee, Guang-Wu Chen, Shin-Ru Shih |

|                                        |                |                     |                                                                                          |                                                                                                                                                                                                   |
|----------------------------------------|----------------|---------------------|------------------------------------------------------------------------------------------|---------------------------------------------------------------------------------------------------------------------------------------------------------------------------------------------------|
| <b>hCoV-19/Taiwan/CGMH-CGU-12/2020</b> | EPI_ISL_417525 | Laboratory Medicine | Department of Laboratory Medicine, Lin-Kou Chang Gung Memorial Hospital, Taoyuan, Taiwan | Kuo-Chien Tsao, Yu-Nong Gong, Shu-Li Yang, Yi-Chun Liu, Chung-Guei Huang, Po-Wei Huang, Mei-Jen Hsiao, Cheng-Ta Yang, Cheng-Hsun Chiu, Peng-Nien Huang, Kuo-Ming Lee, Guang-Wu Chen, Shin-Ru Shih |
| <b>hCoV-19/Taiwan/CGMH-CGU-11/2020</b> | EPI_ISL_417524 | Laboratory Medicine | Department of Laboratory Medicine, Lin-Kou Chang Gung Memorial Hospital, Taoyuan, Taiwan | Kuo-Chien Tsao, Yu-Nong Gong, Shu-Li Yang, Yi-Chun Liu, Chung-Guei Huang, Po-Wei Huang, Mei-Jen Hsiao, Cheng-Ta Yang, Cheng-Hsun Chiu, Peng-Nien Huang, Kuo-Ming Lee, Guang-Wu Chen, Shin-Ru Shih |
| <b>hCoV-19/Taiwan/CGMH-CGU-10/2020</b> | EPI_ISL_417523 | Laboratory Medicine | Department of Laboratory Medicine, Lin-Kou Chang Gung Memorial Hospital, Taoyuan, Taiwan | Kuo-Chien Tsao, Yu-Nong Gong, Shu-Li Yang, Yi-Chun Liu, Chung-Guei Huang, Po-Wei Huang, Mei-Jen Hsiao, Cheng-Ta Yang, Cheng-Hsun Chiu, Peng-Nien Huang, Kuo-Ming Lee, Guang-Wu Chen, Shin-Ru Shih |
| <b>hCoV-19/Taiwan/CGMH-CGU-09/2020</b> | EPI_ISL_417522 | Laboratory Medicine | Department of Laboratory Medicine, Lin-Kou Chang Gung Memorial Hospital, Taoyuan, Taiwan | Kuo-Chien Tsao, Yu-Nong Gong, Shu-Li Yang, Yi-Chun Liu, Chung-Guei Huang, Po-Wei Huang, Mei-Jen Hsiao, Cheng-Ta Yang, Cheng-Hsun Chiu, Peng-Nien Huang, Kuo-Ming Lee, Guang-Wu Chen, Shin-Ru Shih |
| <b>hCoV-19/Taiwan/CGMH-CGU-08/2020</b> | EPI_ISL_417521 | Laboratory Medicine | Department of Laboratory Medicine, Lin-Kou Chang Gung Memorial Hospital, Taoyuan, Taiwan | Kuo-Chien Tsao, Yu-Nong Gong, Shu-Li Yang, Yi-Chun Liu, Chung-Guei Huang, Po-Wei Huang, Mei-Jen Hsiao, Cheng-Ta Yang, Cheng-Hsun Chiu, Peng-Nien Huang, Kuo-Ming Lee, Guang-Wu Chen, Shin-Ru Shih |
| <b>hCoV-19/Taiwan/CGMH-CGU-07/2020</b> | EPI_ISL_417520 | Laboratory Medicine | Department of Laboratory Medicine, Lin-Kou Chang Gung Memorial Hospital, Taoyuan, Taiwan | Kuo-Chien Tsao, Yu-Nong Gong, Shu-Li Yang, Yi-Chun Liu, Chung-Guei Huang, Po-Wei Huang, Mei-Jen Hsiao, Cheng-Ta Yang, Cheng-Hsun Chiu, Peng-Nien Huang, Kuo-Ming Lee, Guang-Wu Chen, Shin-Ru Shih |
| <b>hCoV-19/Taiwan/CGMH-CGU-06/2020</b> | EPI_ISL_417519 | Laboratory Medicine | Department of Laboratory Medicine, Lin-Kou Chang Gung Memorial Hospital, Taoyuan, Taiwan | Kuo-Chien Tsao, Yu-Nong Gong, Shu-Li Yang, Yi-Chun Liu, Chung-Guei Huang, Po-Wei Huang, Mei-Jen Hsiao, Cheng-Ta Yang, Cheng-Hsun Chiu, Peng-Nien Huang, Kuo-Ming Lee, Guang-Wu Chen, Shin-Ru Shih |
| <b>hCoV-19/Taiwan/CGMH-CGU-05/2020</b> | EPI_ISL_415743 | Laboratory Medicine | Department of Laboratory Medicine, Lin-Kou Chang                                         | Kuo-Chien Tsao, Yu-Nong Gong, Shu-Li Yang, Yi-Chun Liu, Chung-Guei                                                                                                                                |



|                                                   |                  |                                                                                         |                                                                                                   |                                                                                                                                                                                                                                                                                |
|---------------------------------------------------|------------------|-----------------------------------------------------------------------------------------|---------------------------------------------------------------------------------------------------|--------------------------------------------------------------------------------------------------------------------------------------------------------------------------------------------------------------------------------------------------------------------------------|
|                                                   |                  |                                                                                         | Gung Memorial Hospital,<br>Taoyuan, Taiwan                                                        | Huang, Po-Wei Huang,<br>Mei-Jen Hsiao, Cheng-Ta<br>Yang, Cheng-Hsun Chiu,<br>Chi-Hsien Huang, Kuang-<br>Tso Le, Shu-Min Lin, Peng-<br>Nien Huang, Kuo-Ming<br>Lee, Guang-Wu Chen,<br>Shin-Ru Shih                                                                              |
| <b>hCoV-<br/>19/Taiwan/CGMH-<br/>CGU-04/2020</b>  | EPI_ISL_415742   | Laboratory Medicine                                                                     | Department of Laboratory<br>Medicine, Lin-Kou Chang<br>Gung Memorial Hospital,<br>Taoyuan, Taiwan | Kuo-Chien Tsao, Yu-Nong<br>Gong, Shu-Li Yang, Yi-<br>Chun Liu, Chung-Guei<br>Huang, Po-Wei Huang,<br>Mei-Jen Hsiao, Cheng-Ta<br>Yang, Cheng-Hsun Chiu,<br>Chi-Hsien Huang, Kuang-<br>Tso Le, Shu-Min Lin, Peng-<br>Nien Huang, Kuo-Ming<br>Lee, Guang-Wu Chen,<br>Shin-Ru Shih |
| <b>hCoV-<br/>19/Taiwan/CGMH-<br/>CGU-03/2020</b>  | EPI_ISL_415741   | Laboratory Medicine                                                                     | Department of Laboratory<br>Medicine, Lin-Kou Chang<br>Gung Memorial Hospital,<br>Taoyuan, Taiwan | Kuo-Chien Tsao, Yu-Nong<br>Gong, Shu-Li Yang, Yi-<br>Chun Liu, Chung-Guei<br>Huang, Po-Wei Huang,<br>Mei-Jen Hsiao, Cheng-Ta<br>Yang, Cheng-Hsun Chiu,<br>Chi-Hsien Huang, Kuang-<br>Tso Le, Shu-Min Lin, Peng-<br>Nien Huang, Kuo-Ming<br>Lee, Guang-Wu Chen,<br>Shin-Ru Shih |
| <b>hCoV-<br/>19/Taiwan/CGMH-<br/>CGU-02/2020</b>  | EPI_ISL_417518   | Laboratory Medicine                                                                     | Department of Laboratory<br>Medicine, Lin-Kou Chang<br>Gung Memorial Hospital,<br>Taoyuan, Taiwan | Kuo-Chien Tsao, Yu-Nong<br>Gong, Shu-Li Yang, Yi-<br>Chun Liu, Chung-Guei<br>Huang, Po-Wei Huang,<br>Mei-Jen Hsiao, Cheng-Ta<br>Yang, Cheng-Hsun Chiu,<br>Peng-Nien Huang, Kuo-<br>Ming Lee, Guang-Wu<br>Chen, Shin-Ru Shih                                                    |
| <b>hCoV-<br/>19/Taiwan/9098/2021</b>              | EPI_ISL_3040149  | Centers for Disease<br>Control, R.O.C. (Taiwan)                                         | Centers for Disease<br>Control, R.O.C. (Taiwan)                                                   | Ji-Rong Yang, Yu-Chi-Lin,<br>Jung-Jung Mu, Ming-Tsan-<br>Liu                                                                                                                                                                                                                   |
| <b>hCoV-<br/>19/Taiwan/906/2021</b>               | EPI_ISL_5854262  | Centers for Disease<br>Control, R.O.C. (Taiwan)                                         | Centers for Disease<br>Control, R.O.C. (Taiwan)                                                   | Ji-Rong Yang, Yu-Chi-Lin,<br>Jung-Jung Mu, Ming-Tsan-<br>Liu                                                                                                                                                                                                                   |
| <b>hCoV-<br/>19/Taiwan/82362211<br/>6098/2022</b> | EPI_ISL_13692642 | Virology Lab, Department<br>of Pathology, National<br>Cheng Kung University<br>Hospital | Virology Lab, Department<br>of Pathology, National<br>Cheng Kung University<br>Hospital           | Huey-Pin Tsai, et al                                                                                                                                                                                                                                                           |
| <b>hCoV-<br/>19/Taiwan/82362211<br/>5792/2022</b> | EPI_ISL_13692643 | Virology Lab, Department<br>of Pathology, National<br>Cheng Kung University<br>Hospital | Virology Lab, Department<br>of Pathology, National<br>Cheng Kung University<br>Hospital           | Huey-Pin Tsai, et al                                                                                                                                                                                                                                                           |
| <b>hCoV-<br/>19/Taiwan/82362211<br/>4192/2022</b> | EPI_ISL_13692640 | Virology Lab, Department<br>of Pathology, National<br>Cheng Kung University<br>Hospital | Virology Lab, Department<br>of Pathology, National<br>Cheng Kung University<br>Hospital           | Huey-Pin Tsai, et al                                                                                                                                                                                                                                                           |
| <b>hCoV-<br/>19/Taiwan/82362211<br/>8919/2022</b> | EPI_ISL_13692641 | Virology Lab, Department<br>of Pathology, National<br>Cheng Kung University<br>Hospital | Virology Lab, Department<br>of Pathology, National<br>Cheng Kung University<br>Hospital           | Huey-Pin Tsai, et al                                                                                                                                                                                                                                                           |
| <b>hCoV-<br/>19/Taiwan/82362208<br/>8157/2022</b> | EPI_ISL_13692636 | Virology Lab, Department<br>of Pathology, National<br>Cheng Kung University<br>Hospital | Virology Lab, Department<br>of Pathology, National<br>Cheng Kung University<br>Hospital           | Huey-Pin Tsai, et al                                                                                                                                                                                                                                                           |

|                                          |                  |                                                                                |                                                                                |                                                                    |
|------------------------------------------|------------------|--------------------------------------------------------------------------------|--------------------------------------------------------------------------------|--------------------------------------------------------------------|
| <b>hCoV-19/Taiwan/82362207/1761/2022</b> | EPI_ISL_13167520 | Virology Lab, Department of Pathology, National Cheng Kung University Hospital | Virology Lab, Department of Pathology, National Cheng Kung University Hospital | Huey-Pin Tsai, et al                                               |
| <b>hCoV-19/Taiwan/814621/2022</b>        | EPI_ISL_13198730 | Centers for Disease Control, R.O.C. (Taiwan)                                   | Centers for Disease Control, R.O.C. (Taiwan)                                   | Ji-Rong Yang, Yu-Chi-Lin, Jung-Jung Mu, Ming-Tsan-Liu              |
| <b>hCoV-19/Taiwan/812/2021</b>           | EPI_ISL_857314   | Centers for Disease Control, R.O.C. (Taiwan)                                   | Centers for Disease Control, R.O.C. (Taiwan)                                   | Ji-Rong Yang, Yu-Chi-Lin, Jung-Jung-Mu, Ming-Tsan-Liu              |
| <b>hCoV-19/Taiwan/8/2020</b>             | EPI_ISL_428488   | Centers for Disease Control, R.O.C. (Taiwan)                                   | Centers for Disease Control, R.O.C. (Taiwan)                                   | Ji-Rong Yang, Yu-Chi-Lin, Jung-Jung Mu, Ming-Tsan-Liu              |
| <b>hCoV-19/Taiwan/7955/2021</b>          | EPI_ISL_3040151  | Centers for Disease Control, R.O.C. (Taiwan)                                   | Centers for Disease Control, R.O.C. (Taiwan)                                   | Ji-Rong Yang, Yu-Chi-Lin, Jung-Jung Mu, Ming-Tsan-Liu              |
| <b>hCoV-19/Taiwan/792/2020</b>           | EPI_ISL_1381386  | Centers for Disease Control, R.O.C. (Taiwan)                                   | Centers for Disease Control, R.O.C. (Taiwan)                                   | Ji-Rong Yang, Yu-Chi-Lin, Jung-Jung Mu, Ming-Tsan-Liu              |
| <b>hCoV-19/Taiwan/78/2020</b>            | EPI_ISL_428490   | Centers for Disease Control, R.O.C. (Taiwan)                                   | Centers for Disease Control, R.O.C. (Taiwan)                                   | Ji-Rong Yang, Yu-Chi-Lin, Jung-Jung Mu, Ming-Tsan-Liu              |
| <b>hCoV-19/Taiwan/58/2020</b>            | EPI_ISL_428491   | Centers for Disease Control, R.O.C. (Taiwan)                                   | Centers for Disease Control, R.O.C. (Taiwan)                                   | Ji-Rong Yang, Yu-Chi-Lin, Jung-Jung Mu, Ming-Tsan-Liu              |
| <b>hCoV-19/Taiwan/5703/2021</b>          | EPI_ISL_3000790  | Centers for Disease Control, R.O.C. (Taiwan)                                   | Centers for Disease Control, R.O.C. (Taiwan)                                   | Ji-Rong Yang, Yu-Chi-Lin, Jung-Jung Mu, Ming-Tsan-Liu              |
| <b>hCoV-19/Taiwan/5/2020</b>             | EPI_ISL_428489   | Centers for Disease Control, R.O.C. (Taiwan)                                   | Centers for Disease Control, R.O.C. (Taiwan)                                   | Ji-Rong Yang, Yu-Chi-Lin, Jung-Jung Mu, Ming-Tsan-Liu              |
| <b>hCoV-19/Taiwan/379368/2022</b>        | EPI_ISL_13198731 | Centers for Disease Control, R.O.C. (Taiwan)                                   | Centers for Disease Control, R.O.C. (Taiwan)                                   | Ji-Rong Yang, Yu-Chi-Lin, Jung-Jung Mu, Ming-Tsan-Liu              |
| <b>hCoV-19/Taiwan/369358/2022</b>        | EPI_ISL_13198729 | Centers for Disease Control, R.O.C. (Taiwan)                                   | Centers for Disease Control, R.O.C. (Taiwan)                                   | Ji-Rong Yang, Yu-Chi-Lin, Jung-Jung Mu, Ming-Tsan-Liu              |
| <b>hCoV-19/Taiwan/3445/2021</b>          | EPI_ISL_2455329  | Centers for Disease Control, R.O.C. (Taiwan)                                   | Centers for Disease Control, R.O.C. (Taiwan)                                   | Ji-Rong Yang, Yu-Chi-Lin, Jung-Jung Mu, Ming-Tsan-Liu              |
| <b>hCoV-19/Taiwan/3/2020</b>             | EPI_ISL_411926   | Taiwan Centers for Disease Control                                             | Taiwan Centers for Disease Control                                             | Ji-Rong Yang, Yu-Chi-Lin, Jung-Jung Mu, Ming-Tsan-Liu              |
| <b>hCoV-19/Taiwan/299/2020</b>           | EPI_ISL_429852   | Centers for Disease Control, R.O.C. (Taiwan)                                   | Centers for Disease Control, R.O.C. (Taiwan)                                   | Ji-Rong Yang, Yu-Chi-Lin, Jung-Jung Mu, Ming-Tsan-Liu              |
| <b>hCoV-19/Taiwan/284/2020</b>           | EPI_ISL_429884   | Centers for Disease Control, R.O.C. (Taiwan)                                   | Centers for Disease Control, R.O.C. (Taiwan)                                   | Ji-Rong Yang, Yu-Chi-Lin, Jung-Jung Mu, Ming-Tsan-Liu              |
| <b>hCoV-19/Taiwan/2262/2021</b>          | EPI_ISL_2455330  | Centers for Disease Control, R.O.C. (Taiwan)                                   | Centers for Disease Control, R.O.C. (Taiwan)                                   | Ji-Rong Yang, Yu-Chi-Lin, Jung-Jung Mu, Ming-Tsan-Liu              |
| <b>hCoV-19/Taiwan/225/2021</b>           | EPI_ISL_421651   | Centers for Disease Control, R.O.C. (Taiwan)                                   | Centers for Disease Control, R.O.C. (Taiwan)                                   | Ji-Rong Yang, Yu-Chi-Lin, Jung-Jung Mu, Ming-Tsan-Liu              |
| <b>hCoV-19/Taiwan/2/2020</b>             | EPI_ISL_406031   | Centers for Disease Control, R.O.C. (Taiwan)                                   | Centers for Disease Control, R.O.C. (Taiwan)                                   | Ji-Rong Yang, Yu-Chi-Lin, Jung-Jung Mu, Ming-Tsan-Liu, Shu-Ying Li |
| <b>hCoV-19/Taiwan/1797952/2022</b>       | EPI_ISL_13237696 | Virology Lab, Department of Pathology, National Cheng Kung University Hospital | Virology Lab, Department of Pathology, National Cheng Kung University Hospital | Huey-Pin Tsai, et al                                               |
| <b>hCoV-19/Taiwan/1797390/2022</b>       | EPI_ISL_13237454 | Virology Lab, Department of Pathology, National                                | Virology Lab, Department of Pathology, National                                | Huey-Pin Tsai, et al                                               |

|                                    |                   |   |                                                                                |                                                                                |                                                       |
|------------------------------------|-------------------|---|--------------------------------------------------------------------------------|--------------------------------------------------------------------------------|-------------------------------------------------------|
|                                    |                   |   | Cheng Kung University Hospital                                                 | Cheng Kung University Hospital                                                 |                                                       |
| <b>hCoV-19/Taiwan/1797389/2022</b> | EPI_ISL_13237132  |   | Virology Lab, Department of Pathology, National Cheng Kung University Hospital | Virology Lab, Department of Pathology, National Cheng Kung University Hospital | Huey-Pin Tsai, et al                                  |
| <b>hCoV-19/Taiwan/1797243/2022</b> | EPI_ISL_13234977  |   | Virology Lab, Department of Pathology, National Cheng Kung University Hospital | Virology Lab, Department of Pathology, National Cheng Kung University Hospital | Huey-Pin Tsai, et al                                  |
| <b>hCoV-19/Taiwan/1794569/2021</b> | EPI_ISL_13234976  |   | Virology Lab, Department of Pathology, National Cheng Kung University Hospital | Virology Lab, Department of Pathology, National Cheng Kung University Hospital | Huey-Pin Tsai, et al                                  |
| <b>hCoV-19/Taiwan/1765277/2021</b> | EPI_ISL_13234975  |   | Virology Lab, Department of Pathology, National Cheng Kung University Hospital | Virology Lab, Department of Pathology, National Cheng Kung University Hospital | Huey-Pin Tsai, et al                                  |
| <b>hCoV-19/Taiwan/1765252/2021</b> | EPI_ISL_13234974  |   | Virology Lab, Department of Pathology, National Cheng Kung University Hospital | Virology Lab, Department of Pathology, National Cheng Kung University Hospital | Huey-Pin Tsai, et al                                  |
| <b>hCoV-19/Taiwan/17099/2021</b>   | EPI_ISL_13 536113 | ? | Centers for Disease Control, R.O.C. (Taiwan)                                   | Centers for Disease Control, R.O.C. (Taiwan)                                   | Ji-Rong Yang, Yu-Chi-Lin, Jung-Jung Mu, Ming-Tsan-Liu |
| <b>hCoV-19/Taiwan/17085/2021</b>   | EPI_ISL_13 535983 | ? | Centers for Disease Control, R.O.C. (Taiwan)                                   | Centers for Disease Control, R.O.C. (Taiwan)                                   | Ji-Rong Yang, Yu-Chi-Lin, Jung-Jung Mu, Ming-Tsan-Liu |
| <b>hCoV-19/Taiwan/17058/2021</b>   | EPI_ISL_13 535670 | ? | Centers for Disease Control, R.O.C. (Taiwan)                                   | Centers for Disease Control, R.O.C. (Taiwan)                                   | Ji-Rong Yang, Yu-Chi-Lin, Jung-Jung Mu, Ming-Tsan-Liu |
| <b>hCoV-19/Taiwan/170/2020</b>     | EPI_ISL_420084    |   | Centers for Disease Control, R.O.C. (Taiwan)                                   | Centers for Disease Control, R.O.C. (Taiwan)                                   | Ji-Rong Yang, Yu-Chi-Lin, Jung-Jung Mu, Ming-Tsan-Liu |
| <b>hCoV-19/Taiwan/1695825/2022</b> | EPI_ISL_13234973  |   | Virology Lab, Department of Pathology, National Cheng Kung University Hospital | Virology Lab, Department of Pathology, National Cheng Kung University Hospital | Huey-Pin Tsai, et al                                  |
| <b>hCoV-19/Taiwan/16028/2021</b>   | EPI_ISL_3087576   |   | Centers for Disease Control, R.O.C. (Taiwan)                                   | Centers for Disease Control, R.O.C. (Taiwan)                                   | Ji-Rong Yang, Yu-Chi-Lin, Jung-Jung Mu, Ming-Tsan-Liu |
| <b>hCoV-19/Taiwan/14454/2021</b>   | EPI_ISL_3040142   |   | Centers for Disease Control, R.O.C. (Taiwan)                                   | Centers for Disease Control, R.O.C. (Taiwan)                                   | Ji-Rong Yang, Yu-Chi-Lin, Jung-Jung Mu, Ming-Tsan-Liu |
| <b>hCoV-19/Taiwan/14409/2021</b>   | EPI_ISL_3000157   |   | Centers for Disease Control, R.O.C. (Taiwan)                                   | Centers for Disease Control, R.O.C. (Taiwan)                                   | Ji-Rong Yang, Yu-Chi-Lin, Jung-Jung Mu, Ming-Tsan-Liu |
| <b>hCoV-19/Taiwan/144/2020</b>     | EPI_ISL_421641    |   | Centers for Disease Control, R.O.C. (Taiwan)                                   | Centers for Disease Control, R.O.C. (Taiwan)                                   | Ji-Rong Yang, Yu-Chi-Lin, Jung-Jung Mu, Ming-Tsan-Liu |
| <b>hCoV-19/Taiwan/14298/2021</b>   | EPI_ISL_3000160   |   | Centers for Disease Control, R.O.C. (Taiwan)                                   | Centers for Disease Control, R.O.C. (Taiwan)                                   | Ji-Rong Yang, Yu-Chi-Lin, Jung-Jung Mu, Ming-Tsan-Liu |
| <b>hCoV-19/Taiwan/14222/2021</b>   | EPI_ISL_3040143   |   | Centers for Disease Control, R.O.C. (Taiwan)                                   | Centers for Disease Control, R.O.C. (Taiwan)                                   | Ji-Rong Yang, Yu-Chi-Lin, Jung-Jung Mu, Ming-Tsan-Liu |
| <b>hCoV-19/Taiwan/13564/2021</b>   | EPI_ISL_3001368   |   | Centers for Disease Control, R.O.C. (Taiwan)                                   | Centers for Disease Control, R.O.C. (Taiwan)                                   | Ji-Rong Yang, Yu-Chi-Lin, Jung-Jung Mu, Ming-Tsan-Liu |
| <b>hCoV-19/Taiwan/13435/2021</b>   | EPI_ISL_3040140   |   | Centers for Disease Control, R.O.C. (Taiwan)                                   | Centers for Disease Control, R.O.C. (Taiwan)                                   | Ji-Rong Yang, Yu-Chi-Lin, Jung-Jung Mu, Ming-Tsan-Liu |
| <b>hCoV-19/Taiwan/13375/2021</b>   | EPI_ISL_3001055   |   | Centers for Disease Control, R.O.C. (Taiwan)                                   | Centers for Disease Control, R.O.C. (Taiwan)                                   | Ji-Rong Yang, Yu-Chi-Lin, Jung-Jung Mu, Ming-Tsan-Liu |

|                                   |                  |                                                                                |                                                                                |                                                       |
|-----------------------------------|------------------|--------------------------------------------------------------------------------|--------------------------------------------------------------------------------|-------------------------------------------------------|
| hCoV-19/Taiwan/13332/2021         | EPI_ISL_2705575  | Centers for Disease Control, R.O.C. (Taiwan)                                   | Centers for Disease Control, R.O.C. (Taiwan)                                   | Ji-Rong Yang, Yu-Chi-Lin, Jung-Jung Mu, Ming-Tsan-Liu |
| hCoV-19/Taiwan/12857/2021         | EPI_ISL_3001841  | Centers for Disease Control, R.O.C. (Taiwan)                                   | Centers for Disease Control, R.O.C. (Taiwan)                                   | Ji-Rong Yang, Yu-Chi-Lin, Jung-Jung Mu, Ming-Tsan-Liu |
| hCoV-19/Taiwan/12828/2021         | EPI_ISL_3040141  | Centers for Disease Control, R.O.C. (Taiwan)                                   | Centers for Disease Control, R.O.C. (Taiwan)                                   | Ji-Rong Yang, Yu-Chi-Lin, Jung-Jung Mu, Ming-Tsan-Liu |
| hCoV-19/Taiwan/128/2020           | EPI_ISL_420083   | Centers for Disease Control, R.O.C. (Taiwan)                                   | Centers for Disease Control, R.O.C. (Taiwan)                                   | Ji-Rong Yang, Yu-Chi-Lin, Jung-Jung Mu, Ming-Tsan-Liu |
| hCoV-19/Taiwan/12699/2021         | EPI_ISL_3002178  | Centers for Disease Control, R.O.C. (Taiwan)                                   | Centers for Disease Control, R.O.C. (Taiwan)                                   | Ji-Rong Yang, Yu-Chi-Lin, Jung-Jung Mu, Ming-Tsan-Liu |
| hCoV-19/Taiwan/125/2020           | EPI_ISL_420082   | Centers for Disease Control, R.O.C. (Taiwan)                                   | Centers for Disease Control, R.O.C. (Taiwan)                                   | Ji-Rong Yang, Yu-Chi-Lin, Jung-Jung Mu, Ming-Tsan-Liu |
| hCoV-19/Taiwan/12288/2021         | EPI_ISL_3040144  | Centers for Disease Control, R.O.C. (Taiwan)                                   | Centers for Disease Control, R.O.C. (Taiwan)                                   | Ji-Rong Yang, Yu-Chi-Lin, Jung-Jung Mu, Ming-Tsan-Liu |
| hCoV-19/Taiwan/1144/2021          | EPI_ISL_5854263  | Centers for Disease Control, R.O.C. (Taiwan)                                   | Centers for Disease Control, R.O.C. (Taiwan)                                   | Ji-Rong Yang, Yu-Chi-Lin, Jung-Jung Mu, Ming-Tsan-Liu |
| hCoV-19/Taiwan/11310/2021         | EPI_ISL_3040146  | Centers for Disease Control, R.O.C. (Taiwan)                                   | Centers for Disease Control, R.O.C. (Taiwan)                                   | Ji-Rong Yang, Yu-Chi-Lin, Jung-Jung Mu, Ming-Tsan-Liu |
| hCoV-19/Taiwan/11103/2021         | EPI_ISL_3040147  | Centers for Disease Control, R.O.C. (Taiwan)                                   | Centers for Disease Control, R.O.C. (Taiwan)                                   | Ji-Rong Yang, Yu-Chi-Lin, Jung-Jung Mu, Ming-Tsan-Liu |
| hCoV-19/Taiwan/11102/2021         | EPI_ISL_3040152  | Centers for Disease Control, R.O.C. (Taiwan)                                   | Centers for Disease Control, R.O.C. (Taiwan)                                   | Ji-Rong Yang, Yu-Chi-Lin, Jung-Jung Mu, Ming-Tsan-Liu |
| hCoV-19/Taiwan/11042/2021         | EPI_ISL_3040145  | Centers for Disease Control, R.O.C. (Taiwan)                                   | Centers for Disease Control, R.O.C. (Taiwan)                                   | Ji-Rong Yang, Yu-Chi-Lin, Jung-Jung Mu, Ming-Tsan-Liu |
| hCoV-19/Taiwan/1103200326544/2021 | EPI_ISL_12667100 | Virology Lab, Department of Pathology, National Cheng Kung University Hospital | Virology Lab, Department of Pathology, National Cheng Kung University Hospital | Huey-Pin Tsai                                         |
| hCoV-19/Taiwan/1100500065622/2021 | EPI_ISL_12666626 | Virology Lab, Department of Pathology, National Cheng Kung University Hospital | Virology Lab, Department of Pathology, National Cheng Kung University Hospital | Huey-Pin Tsai, et al                                  |
| hCoV-19/Taiwan/108/2020           | EPI_ISL_420083   | Centers for Disease Control, R.O.C. (Taiwan)                                   | Centers for Disease Control, R.O.C. (Taiwan)                                   | Ji-Rong Yang, Yu-Chi-Lin, Jung-Jung Mu, Ming-Tsan-Liu |
| hCoV-19/Taiwan/1079/2021          | EPI_ISL_2455264  | Centers for Disease Control, R.O.C. (Taiwan)                                   | Centers for Disease Control, R.O.C. (Taiwan)                                   | Ji-Rong Yang, Yu-Chi-Lin, Jung-Jung Mu, Ming-Tsan-Liu |
| hCoV-19/Taiwan/1078/2021          | EPI_ISL_2455327  | Centers for Disease Control, R.O.C. (Taiwan)                                   | Centers for Disease Control, R.O.C. (Taiwan)                                   | Ji-Rong Yang, Yu-Chi-Lin, Jung-Jung Mu, Ming-Tsan-Liu |
| hCoV-19/Taiwan/10747/2021         | EPI_ISL_3000409  | Centers for Disease Control, R.O.C. (Taiwan)                                   | Centers for Disease Control, R.O.C. (Taiwan)                                   | Ji-Rong Yang, Yu-Chi-Lin, Jung-Jung Mu, Ming-Tsan-Liu |
| hCoV-19/Taiwan/107/2020           | EPI_ISL_420085   | Centers for Disease Control, R.O.C. (Taiwan)                                   | Centers for Disease Control, R.O.C. (Taiwan)                                   | Ji-Rong Yang, Yu-Chi-Lin, Jung-Jung Mu, Ming-Tsan-Liu |
| hCoV-19/Taiwan/10321/2021         | EPI_ISL_3040148  | Centers for Disease Control, R.O.C. (Taiwan)                                   | Centers for Disease Control, R.O.C. (Taiwan)                                   | Ji-Rong Yang, Yu-Chi-Lin, Jung-Jung Mu, Ming-Tsan-Liu |
| hCoV-19/Taiwan/1013/2021          | EPI_ISL_5854267  | Centers for Disease Control, R.O.C. (Taiwan)                                   | Centers for Disease Control, R.O.C. (Taiwan)                                   | Ji-Rong Yang, Yu-Chi-Lin, Jung-Jung Mu, Ming-Tsan-Liu |



|                                                |                  |          |                                                                                |                                                                                |                                                                                                                                                                                                                                                                   |
|------------------------------------------------|------------------|----------|--------------------------------------------------------------------------------|--------------------------------------------------------------------------------|-------------------------------------------------------------------------------------------------------------------------------------------------------------------------------------------------------------------------------------------------------------------|
| <b>hCoV-19/Taiwan/06102200-0207/2022</b>       | EPI_ISL_13168993 |          | Virology Lab, Department of Pathology, National Cheng Kung University Hospital | Virology Lab, Department of Pathology, National Cheng Kung University Hospital | Huey-Pin Tsai, et al                                                                                                                                                                                                                                              |
| <b>hCoV-19/Taiwan/06102200-0205/2022</b>       | EPI_ISL_12665833 |          | Virology Lab, Department of Pathology, National Cheng Kung University Hospital | Virology Lab, Department of Pathology, National Cheng Kung University Hospital | Huey-Pin Tsai, et al                                                                                                                                                                                                                                              |
| <b>hCoV-19/Taiwan/06102200-0087/2022</b>       | EPI_ISL_13168846 |          | Virology Lab, Department of Pathology, National Cheng Kung University Hospital | Virology Lab, Department of Pathology, National Cheng Kung University Hospital | Huey-Pin Tsai, et al                                                                                                                                                                                                                                              |
| <b>hCoV-19/Taiwan/06102000-3933/2020</b>       | EPI_ISL_12665832 |          | Virology Lab, Department of Pathology, National Cheng Kung University Hospital | Virology Lab, Department of Pathology, National Cheng Kung University Hospital | Huey-Pin Tsai, et al                                                                                                                                                                                                                                              |
| <b>hCoV-19/Taiwan/06-109-064485/2020</b>       | EPI_ISL_12665831 |          | Virology Lab, Department of Pathology, National Cheng Kung University Hospital | Virology Lab, Department of Pathology, National Cheng Kung University Hospital | Huey-Pin Tsai, et al                                                                                                                                                                                                                                              |
| <b>Switzerland/ZH-ETHZ-35026221/2021</b>       | EPI_ISL_8807253  | OV668876 | Viollier AG; Hagmattstrasse 14, 4123 Allschwil                                 | ETH ZURICH D-BSEF                                                              | ?                                                                                                                                                                                                                                                                 |
| <b>Switzerland/VD-ETHZ-33470977/2021</b>       | EPI_ISL_3297120  | OU573715 | Viollier AG; Hagmattstrasse 14, 4123 Allschwil                                 | ETH ZURICH D-BSEF                                                              | ?                                                                                                                                                                                                                                                                 |
| <b>Switzerland/BS-UHB-43333655/2022</b>        | EPI_ISL_9999086  | OV912996 | Clinical Virology, University Hospital Basel, Basel, Switzerland               | University Hospital Basel                                                      | ?                                                                                                                                                                                                                                                                 |
| <b>Switzerland/BE-ETHZ-481180/2021</b>         | EPI_ISL_1002016  | OD999762 | Computational evolution group, Mattenstrasse 26, Basel                         | ETH ZURICH D-BSEF                                                              | ?                                                                                                                                                                                                                                                                 |
| <b>hCoV-19/Sweden/PEP37810-8/2022</b>          | EPI_ISL_13522243 |          | Swedish national genomic surveillance program of SARS-CoV-2                    | The Public Health Agency of Sweden                                             | Emmi Andersson, Maria Lind Karlberg, Alma Brolund, Swedish national genomic surveillance program of SARS-CoV-2                                                                                                                                                    |
| <b>hCoV-19/Sweden/01_SE100_22CS104401/2022</b> | EPI_ISL_13625946 |          | Karolinska University Hospital Huddinge                                        | Karolinska University Hospital                                                 | Jan Albert, Tobias Allander, Sandra Broddesson, Robert Dyrdak, Martin Ekman, Lynda Eneh, Shambhu Ganeshappa Aralaguppe, Natalija Gerasimcik, Karina Hentrich, Tanja Normark, Henning Onsbring, Maria Ropat, Annika Tiveljung Lindell, Valtteri Wirta, Zhibing Yun |
| <b>hCoV-19/Spain/CT-HUVH-E49365/2022</b>       | EPI_ISL_13011188 |          | Hospital Universitari Vall d'Hebron - Vall d'Hebron Institut de Recerca        | Hospital Universitari Vall d'Hebron - Vall d'Hebron Institut de Recerca        | Cristina Andr s, Maria Pi ana, Alejandra Gonz lez-S nchez, Damir Garcia-Cehic, Ariadna Rando, Juliana Esperalba, Maria Gema Codina, Carla Castillo, Karen Garc a, Rodrigo V squez, Maria Carmen Martin, Tom s Pumarola, Josep Quer, Andr s Ant n                  |
| <b>hCoV-19/Spain/CT-HU:T-RB32622/2022</b>      | EPI_ISL_12732723 |          | Hospital Universitari Dr. Josep Trueta                                         | Institut d'Investigaci  Biom dica de Girona                                    | Mel lina Pinsach, Bernat del Olmo, Nuria                                                                                                                                                                                                                          |

|                                           |                  |                                                                                                                                        |                                                                                                                                        |                                        |                                                                                                                                                                                                                                                                  |
|-------------------------------------------|------------------|----------------------------------------------------------------------------------------------------------------------------------------|----------------------------------------------------------------------------------------------------------------------------------------|----------------------------------------|------------------------------------------------------------------------------------------------------------------------------------------------------------------------------------------------------------------------------------------------------------------|
|                                           |                  |                                                                                                                                        |                                                                                                                                        | Hospital Universitari Dr. Josep Trueta | Esther Neto, Meritxell Deulofeu, Paula Costa                                                                                                                                                                                                                     |
| <b>hCoV-19/Spain/CT-HUJT-RB32591/2022</b> | EPI_ISL_12729223 | Hospital Universitari Dr. Josep Trueta                                                                                                 | Institut d'Investigaci, àò, à• Biom, àö-Àedica de Girona                                                                               | Hospital Universitari Dr. Josep Trueta | Mel- , àëlina Pinsach, Bernat del Olmo, Nuria Esther Neto, Meritxell Deulofeu, Paula Costa                                                                                                                                                                       |
| <b>hCoV-19/Spain/CT-HUJT-RB32345/2022</b> | EPI_ISL_12155204 | Hospital Universitari Dr. Josep Trueta                                                                                                 | Institut d'Investigaci, àò, à• Biom, àö-Àedica de Girona                                                                               | Hospital Universitari Dr. Josep Trueta | Mel- , àëlina Pinsach, Bernat del Olmo, Nuria Esther Neto, Meritxell Deulofeu, Paula Costa                                                                                                                                                                       |
| <b>hCoV-19/SouthKorea/KDCA 87112/2022</b> | EPI_ISL_13738876 | Division of Emerging Infectious Diseases, Bureau of Infectious Diseases Diagnosis Control, Korea Disease Control and Prevention Agency | Division of Emerging Infectious Diseases, Bureau of Infectious Diseases Diagnosis Control, Korea Disease Control and Prevention Agency |                                        | Jeong-Ah Kim, Ae Kyung Park, Il-Hwan Kim, Chae Young Lee, Hyuck Jin Lee, Eun-Jin Kim                                                                                                                                                                             |
| <b>hCoV-19/SouthKorea/KDCA 87038/2022</b> | EPI_ISL_13738825 | Division of Emerging Infectious Diseases, Bureau of Infectious Diseases Diagnosis Control, Korea Disease Control and Prevention Agency | Division of Emerging Infectious Diseases, Bureau of Infectious Diseases Diagnosis Control, Korea Disease Control and Prevention Agency |                                        | Jeong-Ah Kim, Ae Kyung Park, Il-Hwan Kim, Chae Young Lee, Hyuck Jin Lee, Eun-Jin Kim                                                                                                                                                                             |
| <b>hCoV-19/SouthKorea/KDCA 86943/2022</b> | EPI_ISL_13738759 | Division of Emerging Infectious Diseases, Bureau of Infectious Diseases Diagnosis Control, Korea Disease Control and Prevention Agency | Division of Emerging Infectious Diseases, Bureau of Infectious Diseases Diagnosis Control, Korea Disease Control and Prevention Agency |                                        | Jeong-Ah Kim, Ae Kyung Park, Il-Hwan Kim, Chae Young Lee, Hyuck Jin Lee, Eun-Jin Kim                                                                                                                                                                             |
| <b>hCoV-19/SouthKorea/KDCA 41183/2022</b> | EPI_ISL_12681044 | Division of Emerging Infectious Diseases, Bureau of Infectious Diseases Diagnosis Control, Korea Disease Control and Prevention Agency | Division of Emerging Infectious Diseases, Bureau of Infectious Diseases Diagnosis Control, Korea Disease Control and Prevention Agency |                                        | Jeong-Ah Kim, Ae Kyung Park, Il-Hwan Kim, Chae Young Lee, Hyuck Jin Lee, Eun-Jin Kim                                                                                                                                                                             |
| <b>SouthAfrica/NHLS-UCT-GS-9911/2021</b>  | EPI_ISL_1534389  | OM73960                                                                                                                                | ?                                                                                                                                      | ?                                      | Viana et al                                                                                                                                                                                                                                                      |
| <b>SouthAfrica/NHLS-UCT-GS-7980/2020</b>  | ?                | OM73937                                                                                                                                | ?                                                                                                                                      | ?                                      | Viana et al                                                                                                                                                                                                                                                      |
| <b>hCoV-19/Slovenia/17-000037-NG/2022</b> | EPI_ISL_13179066 | National Laboratory for Health, Environment and Food, OMM, Nova Gorica                                                                 | NLZOH (National Laboratory for Health, Environment and Food)                                                                           |                                        | Sandra Janezic, Aleksander Mahnic, Maja Rupnik, Tja, àà-∞a , ààCE@ohar ΔíV•retnik, Alenka , àà, À†torman, Nika Gobec, Kaja Tominc, Ma, àà-∞a JarΔíVBiΔíVß, Leon MariΔíVß, Sabina Mlakar, Ur, àà-∞ka Dobovi, àà-∞ek, Tanja VrabiΔíVß, Barbara Hrast, Eva LoziΔíVß |
| <b>hCoV-19/Singapore/7131/2022</b>        | EPI_ISL_13500375 | National Public Health Laboratory, National Centre for Infectious Diseases                                                             | National Public Health Laboratory, National Centre for Infectious Diseases                                                             |                                        | Yichen Ding, Grace Ngan, Benny Yeo, Zhenyang Zhou, Royce Ang, Samuel Loo, Lin Cui, Raymond Tzer Pin Lin                                                                                                                                                          |
| <b>hCoV-19/Singapore/6766/2022</b>        | EPI_ISL_13360359 | National Public Health Laboratory, National Centre for Infectious Diseases                                                             | National Public Health Laboratory, National Centre for Infectious Diseases                                                             |                                        | Grace Ngan, Yichen Ding, Benny Yeo, Zhenyang Zhou, Royce Ang, Samuel Loo, BeiBei Chen, Jesslin Tan, Chen Shi Ling, Lin Cui, Raymond Tzer Pin Lin                                                                                                                 |

|                                              |                  |          |                                                                                                          |                                                                            |                                                                                                                                                                                                                                                                                                                                                                                                                                                                                                                                                                      |
|----------------------------------------------|------------------|----------|----------------------------------------------------------------------------------------------------------|----------------------------------------------------------------------------|----------------------------------------------------------------------------------------------------------------------------------------------------------------------------------------------------------------------------------------------------------------------------------------------------------------------------------------------------------------------------------------------------------------------------------------------------------------------------------------------------------------------------------------------------------------------|
| <b>hCoV-19/Singapore/6077/2022</b>           | EPI_ISL_13150658 |          | National Public Health Laboratory, National Centre for Infectious Diseases                               | National Public Health Laboratory, National Centre for Infectious Diseases | Yichen Ding, Grace Ngan, Penny Yeo, Zhenyang Zhou, Royce Ang, Samuel Loo, Lin Cui, Raymond Tzer Pin Lin                                                                                                                                                                                                                                                                                                                                                                                                                                                              |
| <b>hCoV-19/Singapore/5411/2022</b>           | EPI_ISL_12870468 |          | National Public Health Laboratory, National Centre for Infectious Diseases                               | National Public Health Laboratory, National Centre for Infectious Diseases | Grace Ngan, Yichen Ding, Benny Yeo, Zhenyang Zhou, Royce Ang, Samuel Loo, BeiBei Chen, Jesslin Tan, Chen Shi Ling, Lin Cui, Raymond Tzer Pin Lin                                                                                                                                                                                                                                                                                                                                                                                                                     |
| <b>Scotland/QEUH-CC36A1/2020</b>             | EPI_ISL_859182   | OD936389 | Lighthouse Lab in Glasgow                                                                                | Wellcome Sanger Institute                                                  | vanSteenhouse et al                                                                                                                                                                                                                                                                                                                                                                                                                                                                                                                                                  |
| <b>Scotland/QEUH-9CEAF8/2020</b>             | EPI_ISL_601930   | OA999808 | Lighthouse Lab in Glasgow                                                                                | Wellcome Sanger Institute                                                  | vanSteenhouse et al                                                                                                                                                                                                                                                                                                                                                                                                                                                                                                                                                  |
| <b>Scotland/GCVR-170F3A/2020</b>             | EPI_ISL_489684   | OA966278 | NHSGGC West of Scotland Specialist Virology Centre / MRC-University of Glasgow Centre for Virus Research | Wellcome Sanger Institute                                                  | da Silva Filipe et al                                                                                                                                                                                                                                                                                                                                                                                                                                                                                                                                                |
| <b>hCoV-19/Philippines/PH-RITM-1514/2022</b> | EPI_ISL_13355243 |          | FIRST AIDE DIAGNOSTIC CENTER                                                                             | Research Institute for Tropical Medicine                                   | Francisco Gerardo M. Polotan, Gerald Ivan S. Sotelo, Ardiane Ysabelle M. Dolor, Anne Pauline A. Alpino, Jefferson Earl J. Halog, Othoniel Jan T. Onza, Ma. Angelica A. Tujan, Amalea Dulcene D. Nicolasora, Joy Mariette L. Pararay, Criselda T. Bautista, Vina Lea F. Arguelles, Alexander Sadiasa, Catalino S. Demetria, Dodge R. Lim, Angela Kae T. Chang, Ma. Ricci R. Gomez, Claudette Lee S. Navarro, Charalyn Babida, Lei Lanna M. Dancel, Mayan Uy-Lumandas, Timothy John R. Dizon, Kirstyn Brunker, Katie Hampson, Yao-Tsun Li, Simon Daldry, Joseph Hughes |
| <b>hCoV-19/Philippines/PH-RITM-1513/2022</b> | EPI_ISL_13355242 |          | FIRST AIDE DIAGNOSTIC CENTER                                                                             | Research Institute for Tropical Medicine                                   | Francisco Gerardo M. Polotan, Gerald Ivan S. Sotelo, Ardiane Ysabelle M. Dolor, Anne Pauline A. Alpino, Jefferson Earl J. Halog, Othoniel Jan T. Onza, Ma. Angelica A. Tujan, Amalea Dulcene D. Nicolasora, Joy Mariette L. Pararay, Criselda T. Bautista, Vina Lea F. Arguelles, Alexander Sadiasa, Catalino S. Demetria, Dodge R. Lim, Angela Kae T. Chang, Ma. Ricci R. Gomez, Claudette Lee S. Navarro, Charalyn Babida, Lei Lanna M. Dancel, Mayan Uy-Lumandas, Timothy John R. Dizon, Kirstyn Brunker, Katie Hampson, Yao-Tsun                                 |



|                                              |                  |                          |                                                                                                           |                                                                                                           |                                                                                                                                                                                                                                                                                                                                                                                                                                                                                                                                                                      |
|----------------------------------------------|------------------|--------------------------|-----------------------------------------------------------------------------------------------------------|-----------------------------------------------------------------------------------------------------------|----------------------------------------------------------------------------------------------------------------------------------------------------------------------------------------------------------------------------------------------------------------------------------------------------------------------------------------------------------------------------------------------------------------------------------------------------------------------------------------------------------------------------------------------------------------------|
|                                              |                  |                          |                                                                                                           |                                                                                                           | Li, Simon, Daldry, Joseph Hughes                                                                                                                                                                                                                                                                                                                                                                                                                                                                                                                                     |
|                                              |                  |                          |                                                                                                           |                                                                                                           | Francisco Gerardo M. Polotan, Gerald Ivan S. Sotelo, Ardiane Ysabelle M. Dolor, Anne Pauline A. Alpino, Jefferson Earl J. Halog, Othoniel Jan T. Onza, Ma. Angelica A. Tujan, Amalea Dulcene D. Nicolasora, Joy Mariette L. Pararay, Criselda T. Bautista, Vina Lea F. Arguelles, Alexander Sadiasa, Catalino S. Demetria, Dodge R. Lim, Angela Kae T. Chang, Ma. Ricci R. Gomez, Claudette Lee S. Navarro, Charalyn Babida, Lei Lanna M. Dancel, Mayan Uy-Limandas, Timothy John R. Dizon, Kirstyn Brunker, Katie Hampson, Yao-Tsun Li, Simon Daldry, Joseph Hughes |
| <b>hCoV-19/Philippines/PH-RITM-1449/2022</b> | EPI_ISL_13137120 | Chinese General Hospital | Research Institute for Tropical Medicine                                                                  |                                                                                                           |                                                                                                                                                                                                                                                                                                                                                                                                                                                                                                                                                                      |
| <b>OX234701</b>                              | ?                | OX234701                 | ?                                                                                                         | ?                                                                                                         | VanSteenhouse et al                                                                                                                                                                                                                                                                                                                                                                                                                                                                                                                                                  |
| <b>OX231175</b>                              | ?                | OX231175                 | ?                                                                                                         | ?                                                                                                         | Fraser et al                                                                                                                                                                                                                                                                                                                                                                                                                                                                                                                                                         |
| <b>OX225154</b>                              | ?                | OX225154                 | ?                                                                                                         | ?                                                                                                         | Danish Covid-19 Genome et al                                                                                                                                                                                                                                                                                                                                                                                                                                                                                                                                         |
| <b>OX212176</b>                              | ?                | OX212176                 | ?                                                                                                         | ?                                                                                                         | Danish Covid-19 Genome et al                                                                                                                                                                                                                                                                                                                                                                                                                                                                                                                                         |
| <b>OX148100</b>                              | ?                | OX148100                 | West of Scotland Specialist Virology Centre, NHSGGC / MRC-University of Glasgow Centre for Virus Research | West of Scotland Specialist Virology Centre, NHSGGC / MRC-University of Glasgow Centre for Virus Research | ?                                                                                                                                                                                                                                                                                                                                                                                                                                                                                                                                                                    |
| <b>OX148045</b>                              | ?                | OX148045                 | West of Scotland Specialist Virology Centre, NHSGGC / MRC-University of Glasgow Centre for Virus Research | West of Scotland Specialist Virology Centre, NHSGGC / MRC-University of Glasgow Centre for Virus Research | ?                                                                                                                                                                                                                                                                                                                                                                                                                                                                                                                                                                    |
| <b>OX115932</b>                              | ?                | OX115932                 | Universitätsklinikum Heidelberg, Im Neuenheimer Feld 324; 69120 Heidelberg                                | Robert Koch Institute                                                                                     | ?                                                                                                                                                                                                                                                                                                                                                                                                                                                                                                                                                                    |
| <b>OX071736</b>                              | ?                | OX071736                 | West of Scotland Specialist Virology Centre, NHSGGC / MRC-University of Glasgow Centre for Virus Research | West of Scotland Specialist Virology Centre, NHSGGC / MRC-University of Glasgow Centre for Virus Res      | ?                                                                                                                                                                                                                                                                                                                                                                                                                                                                                                                                                                    |
| <b>OW908683</b>                              | ?                | OW908683                 | Sonic - Bioscientia - MVZ Labor Saar GmbH, Otto-Kaiser-Straße 8a; 66386 St. Ingbert                       | Robert Koch Institute                                                                                     | ?                                                                                                                                                                                                                                                                                                                                                                                                                                                                                                                                                                    |
| <b>OW875123</b>                              | ?                | OW875123                 | Bioscientia Labor Wermisdorf, Am Fasanenholz 31; 04779 Wermisdorf                                         | Robert Koch Institute                                                                                     | ?                                                                                                                                                                                                                                                                                                                                                                                                                                                                                                                                                                    |
| <b>OW858367</b>                              | ?                | OW858367                 | Bioscientia Labor Wermisdorf, Am Fasanenholz 31; 04779 Wermisdorf                                         | Robert Koch Institute                                                                                     | ?                                                                                                                                                                                                                                                                                                                                                                                                                                                                                                                                                                    |

|                 |                |          |                                                                                                                                                                                                                     |                                                                                                                                                                                                                     |   |
|-----------------|----------------|----------|---------------------------------------------------------------------------------------------------------------------------------------------------------------------------------------------------------------------|---------------------------------------------------------------------------------------------------------------------------------------------------------------------------------------------------------------------|---|
| <b>OW798735</b> | ?              | OW798735 | Eurofins MVZ Labor Gelsenkirchen, Rotthäuser Straße 19; 44879 Gelsenkirchen                                                                                                                                         | Robert Koch Institute                                                                                                                                                                                               | ? |
| <b>OW790686</b> | ?              | OW790686 | MVZ Labor Krone GbR, Siemensstraße 40; 32105 Bad Salzuflen                                                                                                                                                          | Robert Koch Institute                                                                                                                                                                                               | ? |
| <b>OW720062</b> | ?              | OW720062 | Medizinisch-Diagnostisches Labor Kempten allgÄrulab, Augartenweg 20; 87435 Kempten                                                                                                                                  | Robert Koch Institute                                                                                                                                                                                               | ? |
| <b>OW660369</b> | ?              | OW660369 | Sonic - Bioscientia - MVZ Labor Saar GmbH, Otto-Kaiser-Straße 8a; 66386 St. Ingbert                                                                                                                                 | Robert Koch Institute                                                                                                                                                                                               | ? |
| <b>OW643530</b> | ?              | OW643530 | Limbach - MVZ Labor Dr. Volkmann & Kollegen, Gerwigstr. 67; 76131 Karlsruhe                                                                                                                                         | Robert Koch Institute                                                                                                                                                                                               | ? |
| <b>OW406425</b> | ?              | OW406425 | Northumbria University / South Tees Hospitals NHS Foundation Trust / North Cumbria Integrated Care NHS Foundation Trust / North Tees and Hartlepool NHS Foundation Trust / Newcastle Hospitals NHS Foundation Trust | Northumbria University / South Tees Hospitals NHS Foundation Trust / North Cumbria Integrated Care NHS Foundation Trust / North Tees and Hartlepool NHS Foundation Trust / Newcastle Hospitals NHS Foundation Trust | ? |
| <b>OW309946</b> | ?              | OW309946 | Bioscientia Labor Wermsdorf, Am Fasaneholz 31; 04779 Wermsdorf                                                                                                                                                      | Robert Koch Institute                                                                                                                                                                                               | ? |
| <b>OW300612</b> | ?              | OW300612 | Labor Blackholm MVZ, Bahnhofstraße 14; 74072 Heilbronn                                                                                                                                                              | Robert Koch Institute                                                                                                                                                                                               | ? |
| <b>OU964702</b> | ?              | OU964702 | Universitätsklinikum Köln; Institut für Virologie, Fürst-Bückler-Str. 56; 50935 Köln                                                                                                                                | Robert Koch Institute                                                                                                                                                                                               | ? |
| <b>OU809683</b> | ?              | OU809683 | Wellcome Sanger Institute                                                                                                                                                                                           | Wellcome Sanger Institute                                                                                                                                                                                           | ? |
| <b>OU399240</b> | ?              | OU399240 | MVZ Labor Krone GbR, Siemensstraße 40; 32105 Bad Salzuflen                                                                                                                                                          | Robert Koch Institute                                                                                                                                                                                               | ? |
| <b>OU399129</b> | ?              | OU399129 | Medizinische Laboratorien Düsseldorf, Nordstr. 44; 40477 Düsseldorf                                                                                                                                                 | Robert Koch Institute                                                                                                                                                                                               | ? |
| <b>OU399015</b> | ?              | OU399015 | Labor Dr. Heidrich & Kollegen MVZ GmbH Hamburg, Klinikweg 23; 22081 Hamburg                                                                                                                                         | Robert Koch Institute                                                                                                                                                                                               | ? |
| <b>OU370312</b> | ?              | OU370312 | Eurofins LifeCodexx GmbH, Line-Eid-Strasse 3; 78467 Konstanz                                                                                                                                                        | Robert Koch Institute                                                                                                                                                                                               | ? |
| <b>OU367659</b> | ?              | OU367659 | Eurofins LifeCodexx GmbH, Line-Eid-Strasse 3; 78467 Konstanz                                                                                                                                                        | Robert Koch Institute                                                                                                                                                                                               | ? |
| <b>OU348130</b> | EPI_ISI_223886 | OU348130 | Queens Medical Centre, Clinical Microbiology Department / DeepSeq Nottingham                                                                                                                                        | Queens Medical Centre, Clinical Microbiology Department / DeepSeq Nottingham                                                                                                                                        | ? |
| <b>OU327584</b> | ?              | OU327584 | Gyncentrum, Sosnowiec, Poland                                                                                                                                                                                       | COVID-HUB-PL                                                                                                                                                                                                        | ? |
| <b>OU200398</b> | ?              | OU200398 | Laborarztpraxis Osnabrück, Rostocker                                                                                                                                                                                | Robert Koch Institute                                                                                                                                                                                               | ? |

|                            |                 |          |                                                                                                                      |                       |                       |
|----------------------------|-----------------|----------|----------------------------------------------------------------------------------------------------------------------|-----------------------|-----------------------|
|                            |                 |          | Straße 5-7; 49124 Georgsmarienhütte                                                                                  |                       |                       |
| <b>OU157897</b>            | ?               | OU157897 | SYNLAB MVZ Leverkusen, Paracelsusstraße 13; 51375 Leverkusen                                                         | Robert Koch Institute | ?                     |
| <b>OU155712</b>            | ?               | OU155712 | Centogene; Dr. Bauer Laboratoriums GmbH, Am Strande 7; 18055 Rostock                                                 | Robert Koch Institute | ?                     |
| <b>OU134994</b>            | ?               | OU134994 | MVZ für Laboratoriumsmedizin und Mikrobiologie Koblenz-Mittelrhein (Labor Koblenz), Viktoriastraße 39; 56068 Koblenz | Robert Koch Institute | ?                     |
| <b>OU116859</b>            | ?               | OU116859 | Limbach - MVZ Humangenetik Ulm, Karlstraße 31; 89073 Ulm                                                             | Robert Koch Institute | ?                     |
| <b>OU112926</b>            | ?               | OU112926 | Sonic - Labor Dr. von Froreich GmbH, Großmoorbogen 25; 21079 Hamburg                                                 | Robert Koch Institute | ?                     |
| <b>OU109095</b>            | ?               | OU109095 | SYNLAB MVZ Leverkusen, 51371 Leverkusen                                                                              | Robert Koch Institute | ?                     |
| <b>OU085785</b>            | ?               | OU085785 | Labor Dr. Wisplinghoff - Köln, 50567 Köln                                                                            | Robert Koch Institute | ?                     |
| <b>OU077744</b>            | ?               | OU077744 | MVZ Labor Krone GbR, Sierriensstraße 40; 32105 Bad Salzuflen                                                         | Robert Koch Institute | ?                     |
| <b>OU076529</b>            | ?               | OU076529 | amedes MVZ Hannover, 30159 Hannover                                                                                  | Robert Koch Institute | ?                     |
| <b>NGA/BCVL-24423/2021</b> | EPI_ISL_4026500 | OL601832 | ?                                                                                                                    | ?                     | Lorenzo-Redondo et al |

**hCoV-19/NewZealand/22CV-5528/2021**

EPI\_ISL\_13437154

Wellington SCL (WN)

Institute of Environmental Science and Research (ESR)

Sarah Cockerton, Clare Gebbie, Dhanisha Patel, Rachel Boyle, SallyAnn Harbison, Olivia Stroeven, Xiaoyun Ren, Matt Storey, Nikki Freed, Muhammad Faisal, Jing Wang, Hermes Perez, Anja Werno, Antje van der Linden, Arlo Upton, Chris Mansell, David Hammer, Dragana Drinkovic, Gary McAuliffe, Hana Sofia Andersson, James Ussher, Jill Sherwood, Josh Freeman, Julia Howard, Juliet Elvy, Mary DeAlmeida, Matt Blakiston, Matthew Rogers, Max Bloomfield, Michael Addidle, Michelle Balm, Sally Roberts, Sarah Jefferies, Sharmini Muttaiyah, Susan Morpeth, Susan Taylor, Timothy Blackmore, Vani Sathyendran, Veronica Playle, Virginia Hope, Erasmus Smit, Lauren Jelly, Olin Silander, Ana Claasen, Subin Jeon, Amy Bradhsaw, Bethany Forsythe, Joep de Lig

|                                      |                  |          |                                                                    |                                                                     |                                                                                                                                                                                    |
|--------------------------------------|------------------|----------|--------------------------------------------------------------------|---------------------------------------------------------------------|------------------------------------------------------------------------------------------------------------------------------------------------------------------------------------|
| <b>MEX/CMX-27/2020</b>               | EPI_ISL_1301720  | OK435569 | ?                                                                  | ?                                                                   | Taboada et al                                                                                                                                                                      |
| <b>LR992024</b>                      | ?                | LR992024 | WSSE                                                               | COVID-HUB-PL                                                        | ?                                                                                                                                                                                  |
| <b>LR883998</b>                      | EPI_ISL_529974   | LR883998 | Hospital Universitario12 de Octubre                                | HOSPITAL UNIVERSITARY 12 DE OCTUBRE                                 | Viedma et al                                                                                                                                                                       |
| <b>Lebanon/QIB-387/2021</b>          | ?                | OU606942 | Laboratory of Molecular Biology and Cancer Immunology              | Quadram Institute Bioscience                                        | Tiwari et al                                                                                                                                                                       |
| <b>Lebanon/QIB-242/2021</b>          | ?                | OU604978 | Laboratory of Molecular Biology and Cancer Immunology              | Quadram Institute Bioscience                                        | Tiwari et al                                                                                                                                                                       |
| <b>LC655331</b>                      | ?                | LC655331 | ?                                                                  | ?                                                                   | Haga et al                                                                                                                                                                         |
| <b>KEN/SS2109/2021</b>               | EPI_ISL_4197086  | OK258401 | ?                                                                  | ?                                                                   | Githinji et al                                                                                                                                                                     |
| <b>JPN/HiroHC119c/2020</b>           | EPI_ISL_10957440 | OM978382 | ?                                                                  | ?                                                                   | Kurose et al                                                                                                                                                                       |
| <b>hCoV-19/Japan/TKYkbn2218/2022</b> | EPI_ISL_13293135 |          | Tokyo Metropolitan Institute of Public Health                      | Tokyo Metropolitan Institute of Public Health                       | Akane Negishi, Sachiko Harada, Ryota Kumagai, Ai Suzuki, Fumi Kasuya, Kenshiro Kuroki, Arisa Amano, Maya Isogai, Takushi Fujiwara, Hirofumi Miyake, Mami Nagashima, Kenji Sadamasu |
| <b>hCoV-19/Japan/IC-9966/2022</b>    | EPI_ISL_13027315 |          | SARS-CoV-2 testing team, National Institute of Infectious Diseases | Pathogen Genomics Center, National Institute of Infectious Diseases | Tsuyoshi Sekizuka, Kentaro Itokawa, Rina Tanaka, Masanori Hashino, Nozomu Hanaoka, Masumichi Saito, Naomi Nojiri, Hazuka Y Furihata, Tsuguto Fujimoto, Makoto Kuroda               |
| <b>hCoV-19/Japan/IC-9926/2022</b>    | EPI_ISL_13027290 |          | SARS-CoV-2 testing team, National Institute of Infectious Diseases | Pathogen Genomics Center, National Institute of Infectious Diseases | Tsuyoshi Sekizuka, Kentaro Itokawa, Rina Tanaka, Masanori Hashino, Nozomu Hanaoka, Masumichi Saito, Naomi Nojiri, Hazuka Y Furihata, Tsuguto Fujimoto, Makoto Kuroda               |
| <b>hCoV-19/Japan/IC-9869/2022</b>    | EPI_ISL_13027249 |          | SARS-CoV-2 testing team, National Institute of Infectious Diseases | Pathogen Genomics Center, National Institute of Infectious Diseases | Tsuyoshi Sekizuka, Kentaro Itokawa, Rina Tanaka, Masanori Hashino, Nozomu Hanaoka, Masumichi Saito, Naomi Nojiri, Hazuka Y Furihata, Tsuguto Fujimoto, Makoto Kuroda               |
| <b>hCoV-19/Japan/IC-9812/2022</b>    | EPI_ISL_13027221 |          | SARS-CoV-2 testing team, National Institute of Infectious Diseases | Pathogen Genomics Center, National Institute of Infectious Diseases | Tsuyoshi Sekizuka, Kentaro Itokawa, Rina Tanaka, Masanori Hashino, Nozomu Hanaoka, Masumichi Saito, Naomi Nojiri, Hazuka Y Furihata, Tsuguto Fujimoto, Makoto Kuroda               |
| <b>hCoV-19/Japan/IC-9785/2022</b>    | EPI_ISL_13027192 |          | SARS-CoV-2 testing team, National Institute of Infectious Diseases | Pathogen Genomics Center, National Institute of Infectious Diseases | Tsuyoshi Sekizuka, Kentaro Itokawa, Rina Tanaka, Masanori Hashino, Nozomu                                                                                                          |

|                                   |                  |                                                                          |                                                                           |                                                                                                                                                                                              |
|-----------------------------------|------------------|--------------------------------------------------------------------------|---------------------------------------------------------------------------|----------------------------------------------------------------------------------------------------------------------------------------------------------------------------------------------|
|                                   |                  |                                                                          |                                                                           | Hanaoka, Masumichi<br>Saito, Naomi Nojiri,<br>Hazuka Y Furihata,<br>Tsuguto Fujimoto, Makoto<br>Kuroda                                                                                       |
| <b>hCoV-19/Japan/IC-9613/2022</b> | EPI_ISL_13027064 | SARS-CoV-2 testing team,<br>National Institute of<br>Infectious Diseases | Pathogen Genomics<br>Center, National Institute<br>of Infectious Diseases | Tsuyoshi Sekizuka,<br>Kentaro Itokawa, Rina<br>Tanaka, Masanori<br>Hashino, Nozomu<br>Hanaoka, Masumichi<br>Saito, Naomi Nojiri,<br>Hazuka Y Furihata,<br>Tsuguto Fujimoto, Makoto<br>Kuroda |
| <b>hCoV-19/Japan/IC-9571/2022</b> | EPI_ISL_13027035 | SARS-CoV-2 testing team,<br>National Institute of<br>Infectious Diseases | Pathogen Genomics<br>Center, National Institute<br>of Infectious Diseases | Tsuyoshi Sekizuka,<br>Kentaro Itokawa, Rina<br>Tanaka, Masanori<br>Hashino, Nozomu<br>Hanaoka, Masumichi<br>Saito, Naomi Nojiri,<br>Hazuka Y Furihata,<br>Tsuguto Fujimoto, Makoto<br>Kuroda |
| <b>hCoV-19/Japan/IC-9477/2022</b> | EPI_ISL_13026960 | SARS-CoV-2 testing team,<br>National Institute of<br>Infectious Diseases | Pathogen Genomics<br>Center, National Institute<br>of Infectious Diseases | Tsuyoshi Sekizuka,<br>Kentaro Itokawa, Rina<br>Tanaka, Masanori<br>Hashino, Nozomu<br>Hanaoka, Masumichi<br>Saito, Naomi Nojiri,<br>Hazuka Y Furihata,<br>Tsuguto Fujimoto, Makoto<br>Kuroda |
| <b>hCoV-19/Japan/IC-9428/2022</b> | EPI_ISL_13026918 | SARS-CoV-2 testing team,<br>National Institute of<br>Infectious Diseases | Pathogen Genomics<br>Center, National Institute<br>of Infectious Diseases | Tsuyoshi Sekizuka,<br>Kentaro Itokawa, Rina<br>Tanaka, Masanori<br>Hashino, Nozomu<br>Hanaoka, Masumichi<br>Saito, Naomi Nojiri,<br>Hazuka Y Furihata,<br>Tsuguto Fujimoto, Makoto<br>Kuroda |
| <b>hCoV-19/Japan/IC-9246/2022</b> | EPI_ISL_12807034 | SARS-CoV-2 testing team,<br>National Institute of<br>Infectious Diseases | Pathogen Genomics<br>Center, National Institute<br>of Infectious Diseases | Tsuyoshi Sekizuka,<br>Kentaro Itokawa, Rina<br>Tanaka, Masanori<br>Hashino, Nozomu<br>Hanaoka, Masumichi<br>Saito, Naomi Nojiri,<br>Hazuka Y Furihata,<br>Tsuguto Fujimoto, Makoto<br>Kuroda |
| <b>hCoV-19/Japan/IC-9143/2022</b> | EPI_ISL_12806854 | SARS-CoV-2 testing team,<br>National Institute of<br>Infectious Diseases | Pathogen Genomics<br>Center, National Institute<br>of Infectious Diseases | Tsuyoshi Sekizuka,<br>Kentaro Itokawa, Rina<br>Tanaka, Masanori<br>Hashino, Nozomu<br>Hanaoka, Masumichi<br>Saito, Naomi Nojiri,<br>Hazuka Y Furihata,<br>Tsuguto Fujimoto, Makoto<br>Kuroda |
| <b>hCoV-19/Japan/IC-9101/2022</b> | EPI_ISL_12806812 | SARS-CoV-2 testing team,<br>National Institute of<br>Infectious Diseases | Pathogen Genomics<br>Center, National Institute<br>of Infectious Diseases | Tsuyoshi Sekizuka,<br>Kentaro Itokawa, Rina<br>Tanaka, Masanori<br>Hashino, Nozomu<br>Hanaoka, Masumichi<br>Saito, Naomi Nojiri,<br>Hazuka Y Furihata,                                       |

|                                    |                  |                                                                    |                                                                     |                                                                                                                                                                      |
|------------------------------------|------------------|--------------------------------------------------------------------|---------------------------------------------------------------------|----------------------------------------------------------------------------------------------------------------------------------------------------------------------|
|                                    |                  |                                                                    |                                                                     | Tsuguto Fujimoto, Makoto Kuroda                                                                                                                                      |
| <b>hCoV-19/Japan/IC-8789/2022</b>  | EPI_ISL_12724668 | SARS-CoV-2 testing team, National Institute of Infectious Diseases | Pathogen Genomics Center, National Institute of Infectious Diseases | Tsuyoshi Sekizuka, Kentaro Itokawa, Rina Tanaka, Masanori Hashino, Nozomu Hanaoka, Masumichi Saito, Naomi Nojiri, Hazuka Y Furihata, Tsuguto Fujimoto, Makoto Kuroda |
| <b>hCoV-19/Japan/IC-7302/2022</b>  | EPI_ISL_12096935 | SARS-CoV-2 testing team, National Institute of Infectious Diseases | Pathogen Genomics Center, National Institute of Infectious Diseases | Tsuyoshi Sekizuka, Kentaro Itokawa, Rina Tanaka, Masanori Hashino, Nozomu Hanaoka, Masumichi Saito, Naomi Nojiri, Hazuka Y Furihata, Tsuguto Fujimoto, Makoto Kuroda |
| <b>hCoV-19/Japan/IC-7301/2022</b>  | EPI_ISL_12096934 | SARS-CoV-2 testing team, National Institute of Infectious Diseases | Pathogen Genomics Center, National Institute of Infectious Diseases | Tsuyoshi Sekizuka, Kentaro Itokawa, Rina Tanaka, Masanori Hashino, Nozomu Hanaoka, Masumichi Saito, Naomi Nojiri, Hazuka Y Furihata, Tsuguto Fujimoto, Makoto Kuroda |
| <b>hCoV-19/Japan/IC-11971/2022</b> | EPI_ISL_13565842 | SARS-CoV-2 testing team, National Institute of Infectious Diseases | Pathogen Genomics Center, National Institute of Infectious Diseases | Tsuyoshi Sekizuka, Kentaro Itokawa, Rina Tanaka, Masanori Hashino, Nozomu Hanaoka, Masumichi Saito, Naomi Nojiri, Hazuka Y Furihata, Tsuguto Fujimoto, Makoto Kuroda |
| <b>hCoV-19/Japan/IC-11957/2022</b> | EPI_ISL_13565831 | SARS-CoV-2 testing team, National Institute of Infectious Diseases | Pathogen Genomics Center, National Institute of Infectious Diseases | Tsuyoshi Sekizuka, Kentaro Itokawa, Rina Tanaka, Masanori Hashino, Nozomu Hanaoka, Masumichi Saito, Naomi Nojiri, Hazuka Y Furihata, Tsuguto Fujimoto, Makoto Kuroda |
| <b>hCoV-19/Japan/IC-11956/2022</b> | EPI_ISL_13565830 | SARS-CoV-2 testing team, National Institute of Infectious Diseases | Pathogen Genomics Center, National Institute of Infectious Diseases | Tsuyoshi Sekizuka, Kentaro Itokawa, Rina Tanaka, Masanori Hashino, Nozomu Hanaoka, Masumichi Saito, Naomi Nojiri, Hazuka Y Furihata, Tsuguto Fujimoto, Makoto Kuroda |
| <b>hCoV-19/Japan/IC-11813/2022</b> | EPI_ISL_13565725 | SARS-CoV-2 testing team, National Institute of Infectious Diseases | Pathogen Genomics Center, National Institute of Infectious Diseases | Tsuyoshi Sekizuka, Kentaro Itokawa, Rina Tanaka, Masanori Hashino, Nozomu Hanaoka, Masumichi Saito, Naomi Nojiri, Hazuka Y Furihata, Tsuguto Fujimoto, Makoto Kuroda |

|                                    |                  |                                                                    |                                                                     |                                                                                                                                                                      |
|------------------------------------|------------------|--------------------------------------------------------------------|---------------------------------------------------------------------|----------------------------------------------------------------------------------------------------------------------------------------------------------------------|
| <b>hCoV-19/Japan/IC-11818/2022</b> | EPI_ISL_13565724 | SARS-CoV-2 testing team, National Institute of Infectious Diseases | Pathogen Genomics Center, National Institute of Infectious Diseases | Tsuyoshi Sekizuka, Kentaro Itokawa, Rina Tanaka, Masanori Hashino, Nozomu Hanaoka, Masumichi Saito, Naomi Nojiri, Hazuka Y Furihata, Tsuguto Fujimoto, Makoto Kuroda |
| <b>hCoV-19/Japan/IC-11817/2022</b> | EPI_ISL_13565723 | SARS-CoV-2 testing team, National Institute of Infectious Diseases | Pathogen Genomics Center, National Institute of Infectious Diseases | Tsuyoshi Sekizuka, Kentaro Itokawa, Rina Tanaka, Masanori Hashino, Nozomu Hanaoka, Masumichi Saito, Naomi Nojiri, Hazuka Y Furihata, Tsuguto Fujimoto, Makoto Kuroda |
| <b>hCoV-19/Japan/IC-11816/2022</b> | EPI_ISL_13565722 | SARS-CoV-2 testing team, National Institute of Infectious Diseases | Pathogen Genomics Center, National Institute of Infectious Diseases | Tsuyoshi Sekizuka, Kentaro Itokawa, Rina Tanaka, Masanori Hashino, Nozomu Hanaoka, Masumichi Saito, Naomi Nojiri, Hazuka Y Furihata, Tsuguto Fujimoto, Makoto Kuroda |
| <b>hCoV-19/Japan/IC-11599/2022</b> | EPI_ISL_13565560 | SARS-CoV-2 testing team, National Institute of Infectious Diseases | Pathogen Genomics Center, National Institute of Infectious Diseases | Tsuyoshi Sekizuka, Kentaro Itokawa, Rina Tanaka, Masanori Hashino, Nozomu Hanaoka, Masumichi Saito, Naomi Nojiri, Hazuka Y Furihata, Tsuguto Fujimoto, Makoto Kuroda |
| <b>hCoV-19/Japan/IC-11518/2022</b> | EPI_ISL_13565493 | SARS-CoV-2 testing team, National Institute of Infectious Diseases | Pathogen Genomics Center, National Institute of Infectious Diseases | Tsuyoshi Sekizuka, Kentaro Itokawa, Rina Tanaka, Masanori Hashino, Nozomu Hanaoka, Masumichi Saito, Naomi Nojiri, Hazuka Y Furihata, Tsuguto Fujimoto, Makoto Kuroda |
| <b>hCoV-19/Japan/IC-11503/2022</b> | EPI_ISL_13565480 | SARS-CoV-2 testing team, National Institute of Infectious Diseases | Pathogen Genomics Center, National Institute of Infectious Diseases | Tsuyoshi Sekizuka, Kentaro Itokawa, Rina Tanaka, Masanori Hashino, Nozomu Hanaoka, Masumichi Saito, Naomi Nojiri, Hazuka Y Furihata, Tsuguto Fujimoto, Makoto Kuroda |
| <b>hCoV-19/Japan/IC-11319/2022</b> | EPI_ISL_13217741 | SARS-CoV-2 testing team, National Institute of Infectious Diseases | Pathogen Genomics Center, National Institute of Infectious Diseases | Tsuyoshi Sekizuka, Kentaro Itokawa, Rina Tanaka, Masanori Hashino, Nozomu Hanaoka, Masumichi Saito, Naomi Nojiri, Hazuka Y Furihata, Tsuguto Fujimoto, Makoto Kuroda |
| <b>hCoV-19/Japan/IC-11302/2022</b> | EPI_ISL_13217728 | SARS-CoV-2 testing team, National Institute of Infectious Diseases | Pathogen Genomics Center, National Institute of Infectious Diseases | Tsuyoshi Sekizuka, Kentaro Itokawa, Rina Tanaka, Masanori                                                                                                            |

|                                    |                  |                                                                          |                                                                           |                                                                                                                                                                                              |
|------------------------------------|------------------|--------------------------------------------------------------------------|---------------------------------------------------------------------------|----------------------------------------------------------------------------------------------------------------------------------------------------------------------------------------------|
|                                    |                  |                                                                          |                                                                           | Hashino, Nozomu<br>Hanaoka, Masumichi<br>Saito, Naomi Nojiri,<br>Hazuka Y Furihata,<br>Tsuguto Fujimoto, Makoto<br>Kuroda                                                                    |
| <b>hCoV-19/Japan/IC-11076/2022</b> | EPI_ISL_13217557 | SARS-CoV-2 testing team,<br>National Institute of<br>Infectious Diseases | Pathogen Genomics<br>Center, National Institute<br>of Infectious Diseases | Tsuyoshi Sekizuka,<br>Kentaro Itokawa, Rina<br>Tanaka, Masanori<br>Hashino, Nozomu<br>Hanaoka, Masumichi<br>Saito, Naomi Nojiri,<br>Hazuka Y Furihata,<br>Tsuguto Fujimoto, Makoto<br>Kuroda |
| <b>hCoV-19/Japan/IC-11004/2022</b> | EPI_ISL_13217492 | SARS-CoV-2 testing team,<br>National Institute of<br>Infectious Diseases | Pathogen Genomics<br>Center, National Institute<br>of Infectious Diseases | Tsuyoshi Sekizuka,<br>Kentaro Itokawa, Rina<br>Tanaka, Masanori<br>Hashino, Nozomu<br>Hanaoka, Masumichi<br>Saito, Naomi Nojiri,<br>Hazuka Y Furihata,<br>Tsuguto Fujimoto, Makoto<br>Kuroda |
| <b>hCoV-19/Japan/IC-11003/2022</b> | EPI_ISL_13217491 | SARS-CoV-2 testing team,<br>National Institute of<br>Infectious Diseases | Pathogen Genomics<br>Center, National Institute<br>of Infectious Diseases | Tsuyoshi Sekizuka,<br>Kentaro Itokawa, Rina<br>Tanaka, Masanori<br>Hashino, Nozomu<br>Hanaoka, Masumichi<br>Saito, Naomi Nojiri,<br>Hazuka Y Furihata,<br>Tsuguto Fujimoto, Makoto<br>Kuroda |
| <b>hCoV-19/Japan/IC-10946/2022</b> | EPI_ISL_13217448 | SARS-CoV-2 testing team,<br>National Institute of<br>Infectious Diseases | Pathogen Genomics<br>Center, National Institute<br>of Infectious Diseases | Tsuyoshi Sekizuka,<br>Kentaro Itokawa, Rina<br>Tanaka, Masanori<br>Hashino, Nozomu<br>Hanaoka, Masumichi<br>Saito, Naomi Nojiri,<br>Hazuka Y Furihata,<br>Tsuguto Fujimoto, Makoto<br>Kuroda |
| <b>hCoV-19/Japan/IC-10933/2022</b> | EPI_ISL_13217439 | SARS-CoV-2 testing team,<br>National Institute of<br>Infectious Diseases | Pathogen Genomics<br>Center, National Institute<br>of Infectious Diseases | Tsuyoshi Sekizuka,<br>Kentaro Itokawa, Rina<br>Tanaka, Masanori<br>Hashino, Nozomu<br>Hanaoka, Masumichi<br>Saito, Naomi Nojiri,<br>Hazuka Y Furihata,<br>Tsuguto Fujimoto, Makoto<br>Kuroda |
| <b>hCoV-19/Japan/IC-10861/2022</b> | EPI_ISL_13217385 | SARS-CoV-2 testing team,<br>National Institute of<br>Infectious Diseases | Pathogen Genomics<br>Center, National Institute<br>of Infectious Diseases | Tsuyoshi Sekizuka,<br>Kentaro Itokawa, Rina<br>Tanaka, Masanori<br>Hashino, Nozomu<br>Hanaoka, Masumichi<br>Saito, Naomi Nojiri,<br>Hazuka Y Furihata,<br>Tsuguto Fujimoto, Makoto<br>Kuroda |
| <b>hCoV-19/Japan/IC-10855/2022</b> | EPI_ISL_13217381 | SARS-CoV-2 testing team,<br>National Institute of<br>Infectious Diseases | Pathogen Genomics<br>Center, National Institute<br>of Infectious Diseases | Tsuyoshi Sekizuka,<br>Kentaro Itokawa, Rina<br>Tanaka, Masanori<br>Hashino, Nozomu<br>Hanaoka, Masumichi<br>Saito, Naomi Nojiri,                                                             |



|                                    |                  |                                                                          |                                                                           |                                                                                                                                                                                              |
|------------------------------------|------------------|--------------------------------------------------------------------------|---------------------------------------------------------------------------|----------------------------------------------------------------------------------------------------------------------------------------------------------------------------------------------|
|                                    |                  |                                                                          |                                                                           | Hazuka Y Furihata,<br>Tsuguto Fujimoto, Makoto<br>Kuroda                                                                                                                                     |
| <b>hCoV-19/Japan/IC-10669/2022</b> | EPI_ISL_13167924 | SARS-CoV-2 testing team,<br>National Institute of<br>Infectious Diseases | Pathogen Genomics<br>Center, National Institute<br>of Infectious Diseases | Tsuyoshi Sekizuka,<br>Kentaro Itokawa, Rina<br>Tanaka, Masanori<br>Hashino, Nozomu<br>Hanaoka, Masumichi<br>Saito, Naomi Nojiri,<br>Hazuka Y Furihata,<br>Tsuguto Fujimoto, Makoto<br>Kuroda |
| <b>hCoV-19/Japan/IC-10593/2022</b> | EPI_ISL_13167861 | SARS-CoV-2 testing team,<br>National Institute of<br>Infectious Diseases | Pathogen Genomics<br>Center, National Institute<br>of Infectious Diseases | Tsuyoshi Sekizuka,<br>Kentaro Itokawa, Rina<br>Tanaka, Masanori<br>Hashino, Nozomu<br>Hanaoka, Masumichi<br>Saito, Naomi Nojiri,<br>Hazuka Y Furihata,<br>Tsuguto Fujimoto, Makoto<br>Kuroda |
| <b>hCoV-19/Japan/IC-10581/2022</b> | EPI_ISL_13167851 | SARS-CoV-2 testing team,<br>National Institute of<br>Infectious Diseases | Pathogen Genomics<br>Center, National Institute<br>of Infectious Diseases | Tsuyoshi Sekizuka,<br>Kentaro Itokawa, Rina<br>Tanaka, Masanori<br>Hashino, Nozomu<br>Hanaoka, Masumichi<br>Saito, Naomi Nojiri,<br>Hazuka Y Furihata,<br>Tsuguto Fujimoto, Makoto<br>Kuroda |
| <b>hCoV-19/Japan/IC-10546/2022</b> | EPI_ISL_13167827 | SARS-CoV-2 testing team,<br>National Institute of<br>Infectious Diseases | Pathogen Genomics<br>Center, National Institute<br>of Infectious Diseases | Tsuyoshi Sekizuka,<br>Kentaro Itokawa, Rina<br>Tanaka, Masanori<br>Hashino, Nozomu<br>Hanaoka, Masumichi<br>Saito, Naomi Nojiri,<br>Hazuka Y Furihata,<br>Tsuguto Fujimoto, Makoto<br>Kuroda |
| <b>hCoV-19/Japan/IC-10456/2022</b> | EPI_ISL_13167755 | SARS-CoV-2 testing team,<br>National Institute of<br>Infectious Diseases | Pathogen Genomics<br>Center, National Institute<br>of Infectious Diseases | Tsuyoshi Sekizuka,<br>Kentaro Itokawa, Rina<br>Tanaka, Masanori<br>Hashino, Nozomu<br>Hanaoka, Masumichi<br>Saito, Naomi Nojiri,<br>Hazuka Y Furihata,<br>Tsuguto Fujimoto, Makoto<br>Kuroda |
| <b>hCoV-19/Japan/IC-10455/2022</b> | EPI_ISL_13167754 | SARS-CoV-2 testing team,<br>National Institute of<br>Infectious Diseases | Pathogen Genomics<br>Center, National Institute<br>of Infectious Diseases | Tsuyoshi Sekizuka,<br>Kentaro Itokawa, Rina<br>Tanaka, Masanori<br>Hashino, Nozomu<br>Hanaoka, Masumichi<br>Saito, Naomi Nojiri,<br>Hazuka Y Furihata,<br>Tsuguto Fujimoto, Makoto<br>Kuroda |
| <b>hCoV-19/Japan/IC-10424/2022</b> | EPI_ISL_13027633 | SARS-CoV-2 testing team,<br>National Institute of<br>Infectious Diseases | Pathogen Genomics<br>Center, National Institute<br>of Infectious Diseases | Tsuyoshi Sekizuka,<br>Kentaro Itokawa, Rina<br>Tanaka, Masanori<br>Hashino, Nozomu<br>Hanaoka, Masumichi<br>Saito, Naomi Nojiri,<br>Hazuka Y Furihata,<br>Tsuguto Fujimoto, Makoto<br>Kuroda |

|                                                     |                  |          |                                                                    |                                                                     |                                                                                                                                                                                                       |
|-----------------------------------------------------|------------------|----------|--------------------------------------------------------------------|---------------------------------------------------------------------|-------------------------------------------------------------------------------------------------------------------------------------------------------------------------------------------------------|
| <b>hCoV-19/Japan/IC-10423/2022</b>                  | EPI_ISL_13027632 |          | SARS-CoV-2 testing team, National Institute of Infectious Diseases | Pathogen Genomics Center, National Institute of Infectious Diseases | Tsuyoshi Sekizuka, Kentaro Itokawa, Rina Tanaka, Masanori Hashino, Nozomu Hanaoka, Masumichi Saito, Naomi Nojiri, Hazuka Y Furihata, Tsuguto Fujimoto, Makoto Kuroda                                  |
| <b>hCoV-19/Japan/IC-10105/2022</b>                  | EPI_ISL_13027412 |          | SARS-CoV-2 testing team, National Institute of Infectious Diseases | Pathogen Genomics Center, National Institute of Infectious Diseases | Tsuyoshi Sekizuka, Kentaro Itokawa, Rina Tanaka, Masanori Hashino, Nozomu Hanaoka, Masumichi Saito, Naomi Nojiri, Hazuka Y Furihata, Tsuguto Fujimoto, Makoto Kuroda                                  |
| <b>Japan/Donner417/2021</b>                         | EPI_ISL_1973268  | BS001081 | ?                                                                  | ?                                                                   | Kosaki et al                                                                                                                                                                                          |
| <b>hCoV-19/Italy/UMB-LAOP-74-1-03-2022/2022</b>     | EPI_ISL_13440240 |          | A.O. TERNI                                                         | A.O. PERUGIA                                                        | Palumbo M, Scaccetti A, Ricchieraro G, Ciurnelli R, Cappelletti E, Lepri E, Bondi P, Lucheroni F, Spaccapelo R                                                                                        |
| <b>hCoV-19/Indonesia/JK-NIHRD-WGS.22.05393/2022</b> | EPI_ISL_13501633 |          | RSDC Wisma Atlet Kemayoran                                         | National Institute of Health Research and Development               | Nur Ika Hariastuti, Hana Apsari Pawestri, Arie Ardiansyah Nugraha, Fajar Nur Sulistiyohadi, Hartanti Dian Ikawati, Subangkit, Kartika Dewi Puspa, Putri Widia Astuti, Nelis Imaningsih, IGM Wirabrata |
| <b>hCoV-19/Indonesia/JK-NIHRD-WGS.22.05391/2022</b> | EPI_ISL_13501631 |          | RSDC Wisma Atlet Kemayoran                                         | National Institute of Health Research and Development               | Nur Ika Hariastuti, Hana Apsari Pawestri, Arie Ardiansyah Nugraha, Fajar Nur Sulistiyohadi, Hartanti Dian Ikawati, Subangkit, Kartika Dewi Puspa, Putri Widia Astuti, Nelis Imaningsih, IGM Wirabrata |
| <b>hCoV-19/Indonesia/JK-NIHRD-WGS.22.05182/2022</b> | EPI_ISL_13501539 |          | RSDC Wisma Atlet Kemayoran                                         | National Institute of Health Research and Development               | Fajar Nur Sulistiyohadi, Hartanti Dian Ikawati, Arie Ardiansyah Nugraha, Hana Apsari Pawestri, Subangkit, Kartika Dewi Puspa, Nur Ika Hariastuti, Putri Widia Astuti, Nelis Imaningsih, IGM Wirabrata |
| <b>hCoV-19/Indonesia/JK-NIHRD-WGS.22.05181/2022</b> | EPI_ISL_13501538 |          | RSDC Wisma Atlet Kemayoran                                         | National Institute of Health Research and Development               | Fajar Nur Sulistiyohadi, Hartanti Dian Ikawati, Arie Ardiansyah Nugraha, Hana Apsari Pawestri, Subangkit, Kartika Dewi Puspa, Nur Ika Hariastuti, Putri Widia Astuti, Nelis Imaningsih, IGM Wirabrata |
| <b>hCoV-19/Indonesia/JK-NIHRD-WGS-22-06337/2022</b> | EPI_ISL_13638122 |          | GSI Lab                                                            | National Institute of Health Research and Development               | Subangkit, Hana Apsari Pawestri, Arie Ardiansyah Nugraha, Fajar Nur Sulistiyohadi, Hartanti Dian Ikawati, Kartika Dewi                                                                                |

|                                                     |                  |                             |                                                       |  |                                                                                                                                                                                                       |
|-----------------------------------------------------|------------------|-----------------------------|-------------------------------------------------------|--|-------------------------------------------------------------------------------------------------------------------------------------------------------------------------------------------------------|
|                                                     |                  |                             |                                                       |  | Puspa, Nur Ika Hariastuti, Putri Widia Astuti, Nelis Imaningsih, IGM Wirabrata                                                                                                                        |
| <b>hCoV-19/Indonesia/JK-NIHRD-WGS-22-06322/2022</b> | EPI_ISL_13638119 | GSI Lab                     | National Institute of Health Research and Development |  | Nur Ika Hariastuti, Hana Apsari Pawestri, Arie Ardiansyah Nugraha, Fajar Nur Sulistiyohadi, Hartanti Dian Ikawati, Subangkit, Kartika Dewi Puspa, Putri Widia Astuti, Nelis Imaningsih, IGM Wirabrata |
| <b>hCoV-19/Indonesia/JK-NIHRD-WGS-22-05733/2022</b> | EPI_ISL_13521470 | RSDC Wisma Atlet Kemayoran  | National Institute of Health Research and Development |  | Nur Ika Hariastuti, Hana Apsari Pawestri, Arie Ardiansyah Nugraha, Fajar Nur Sulistiyohadi, Hartanti Dian Ikawati, Subangkit, Kartika Dewi Puspa, Putri Widia Astuti, Nelis Imaningsih, IGM Wirabrata |
| <b>hCoV-19/Indonesia/JK-NIHRD-WGS_22_06654/2022</b> | EPI_ISL_13637472 | Econolab Jakarta            | National Institute of Health Research and Development |  | Nur Ika Hariastuti, Hana Apsari Pawestri, Arie Ardiansyah Nugraha, Fajar Nur Sulistiyohadi, Hartanti Dian Ikawati, Subangkit, Kartika Dewi Puspa, Putri Widia Astuti, Nelis Imaningsih, IGM Wirabrata |
| <b>hCoV-19/Indonesia/JK-NIHRD-WGS_22_06381/2022</b> | EPI_ISL_13636548 | Econolab Jakarta            | National Institute of Health Research and Development |  | Hartanti Dian Ikawati, Arie Ardiansyah Nugraha, Fajar Nur Sulistiyohadi, Hana Apsari Pawestri, Subangkit, Kartika Dewi Puspa, Nur Ika Hariastuti, Putri Widia Astuti, Nelis Imaningsih, IGM Wirabrata |
| <b>hCoV-19/Indonesia/JK-NIHRD-WGS_22_04949/2022</b> | EPI_ISL_13466509 | Laboratorium Klinik Karunia | National Institute of Health Research and Development |  | Hana Apsari Pawestri, Arie Ardiansyah Nugraha, Fajar Nur Sulistiyohadi, Hartanti Dian Ikawati, Subangkit, Kartika Dewi Puspa, Nur Ika Hariastuti, Putri Widia Astuti, Nelis Imaningsih, IGM Wirabrata |
| <b>hCoV-19/Indonesia/JK-NIHRD-WGS_22_04948/2022</b> | EPI_ISL_13466508 | Laboratorium Klinik Karunia | National Institute of Health Research and Development |  | Hana Apsari Pawestri, Arie Ardiansyah Nugraha, Fajar Nur Sulistiyohadi, Hartanti Dian Ikawati, Subangkit, Kartika Dewi Puspa, Nur Ika Hariastuti, Putri Widia Astuti, Nelis Imaningsih, IGM Wirabrata |
| <b>hCoV-19/Indonesia/JK-NIHRD-WGS_22_04945/2022</b> | EPI_ISL_13466506 | Laboratorium Klinik Karunia | National Institute of Health Research and Development |  | Subangkit, Hana Apsari Pawestri, Arie Ardiansyah Nugraha, Fajar Nur Sulistiyohadi, Hartanti Dian Ikawati, Kartika Dewi Puspa, Nur Ika Hariastuti, Putri Widia Astuti, Nelis Imaningsih, IGM Wirabrata |

|                                                     |                    |                             |                                                       |                                                                                                                                                                                                       |
|-----------------------------------------------------|--------------------|-----------------------------|-------------------------------------------------------|-------------------------------------------------------------------------------------------------------------------------------------------------------------------------------------------------------|
| <b>hCoV-19/Indonesia/JK-NIHRD-WGS_22_04943/2022</b> | EPI_ISL_13466505   | Laboratorium Klinik Karunia | National Institute of Health Research and Development | Hana Apsari Pawestri, Arie Ardiansyah Nugraha, Fajar Nur Sulistiyohadi, Hartanti Dian Ikawati, Subangkit, Kartika Dewi Puspa, Nur Ika Hariastuti, Putri Widia Astuti, Nelis Imaningsih, IGM Wirabrata |
| <b>hCoV-19/Indonesia/JK-NIHRD-WGS_22_04942/2022</b> | EPI_ISL_13466504   | Laboratorium Klinik Karunia | National Institute of Health Research and Development | Nur Ika Hariastuti, Hana Apsari Pawestri, Arie Ardiansyah Nugraha, Fajar Nur Sulistiyohadi, Hartanti Dian Ikawati, Subangkit, Kartika Dewi Puspa, Putri Widia Astuti, Nelis Imaningsih, IGM Wirabrata |
| <b>hCoV-19/Indonesia/JK-NIHRD-WGS_22_04941/2022</b> | EPI_ISL_13466503   | Laboratorium Klinik Karunia | National Institute of Health Research and Development | Nur Ika Hariastuti, Hana Apsari Pawestri, Arie Ardiansyah Nugraha, Fajar Nur Sulistiyohadi, Hartanti Dian Ikawati, Subangkit, Kartika Dewi Puspa, Putri Widia Astuti, Nelis Imaningsih, IGM Wirabrata |
| <b>hCoV-19/Indonesia/JB-NIHRD-WGS.22.08079/2022</b> | EPI_ISL_13905517 ? | Helix Laboratorium          | National Institute of Health Research and Development | Nelis Imaningsih, Arie Ardiansyah Nugraha, Fajar Nur Sulistiyohadi, Hana Apsari Pawestri, Hartanti Dian Ikawati, Subangkit, Kartika Dewi Puspa, Nur Ika Hariastuti, Putri Widia Astuti, IGM Wirabrata |
| <b>hCoV-19/Indonesia/JB-NIHRD-WGS-22-07573/2022</b> | EPI_ISL_13752196   | Naraya Medical Center       | National Institute of Health Research and Development | Kartika Dewi Puspa, Arie Ardiansyah Nugraha, Fajar Nur Sulistiyohadi, Hana Apsari Pawestri, Hartanti Dian Ikawati, Subangkit, Nur Ika Hariastuti, Putri Widia Astuti, Nelis Imaningsih, IGM Wirabrata |
| <b>hCoV-19/Indonesia/JB-NIHRD-WGS-22-07572/2022</b> | EPI_ISL_13752205   | Naraya Medical Center       | National Institute of Health Research and Development | Subangkit, Hana Apsari Pawestri, Arie Ardiansyah Nugraha, Fajar Nur Sulistiyohadi, Hartanti Dian Ikawati, Kartika Dewi Puspa, Nur Ika Hariastuti, Putri Widia Astuti, Nelis Imaningsih, IGM Wirabrata |
| <b>hCoV-19/Indonesia/JB-NIHRD-WGS-22-07569/2022</b> | EPI_ISL_13752200   | Naraya Medical Center       | National Institute of Health Research and Development | Nur Ika Hariastuti, Hana Apsari Pawestri, Arie Ardiansyah Nugraha, Fajar Nur Sulistiyohadi, Hartanti Dian Ikawati, Subangkit, Kartika Dewi Puspa, Putri Widia Astuti, Nelis Imaningsih, IGM Wirabrata |
| <b>hCoV-19/Indonesia/JB-NIHRD-WGS-22-07567/2022</b> | EPI_ISL_13752202   | Naraya Medical Center       | National Institute of Health Research and Development | Nur Ika Hariastuti, Hana Apsari Pawestri, Arie Ardiansyah Nugraha, Fajar Nur Sulistiyohadi, Hartanti Dian Ikawati, Subangkit,                                                                         |

|                                                           |                  |                          |                                                                                                                                                      |                                                                                                                                                                                                                                                |
|-----------------------------------------------------------|------------------|--------------------------|------------------------------------------------------------------------------------------------------------------------------------------------------|------------------------------------------------------------------------------------------------------------------------------------------------------------------------------------------------------------------------------------------------|
|                                                           |                  |                          |                                                                                                                                                      | Kartika Dewi Puspa, Putri Widia Astuti, Nelis Imaningsih, IGM Wirabrata                                                                                                                                                                        |
| <b>hCoV-19/Indonesia/JB-NIHRD-WGS-22-07564/2022</b>       | EPI_ISL_13752198 | Naraya Medical Center    | National Institute of Health Research and Development                                                                                                | Nur Ika Hariastuti, Hana Apsari Pawestri, Arie Ardiansyah Nugraha, Fajar Nur Sulistiyohadi, Hartanti Dian Ikawati, Subangkit, Kartika Dewi Puspa, Putri Widia Astuti, Nelis Imaningsih, IGM Wirabrata                                          |
| <b>hCoV-19/Indonesia/JB-NIHRD-WGS-22-07563/2022</b>       | EPI_ISL_13752207 | Naraya Medical Center    | National Institute of Health Research and Development                                                                                                | Nur Ika Hariastuti, Hana Apsari Pawestri, Arie Ardiansyah Nugraha, Fajar Nur Sulistiyohadi, Hartanti Dian Ikawati, Subangkit, Kartika Dewi Puspa, Putri Widia Astuti, Nelis Imaningsih, IGM Wirabrata                                          |
| <b>hCoV-19/Indonesia/JB-NIHRD-WGS-22-07562/2022</b>       | EPI_ISL_13752197 | Naraya Medical Center    | National Institute of Health Research and Development                                                                                                | Nur Ika Hariastuti, Hana Apsari Pawestri, Arie Ardiansyah Nugraha, Fajar Nur Sulistiyohadi, Hartanti Dian Ikawati, Subangkit, Kartika Dewi Puspa, Putri Widia Astuti, Nelis Imaningsih, IGM Wirabrata                                          |
| <b>hCoV-19/Indonesia/JB-NIHRD-WGS-22-07559/2022</b>       | EPI_ISL_13752203 | Naraya Medical Center    | National Institute of Health Research and Development                                                                                                | Hana Apsari Pawestri, Arie Ardiansyah Nugraha, Fajar Nur Sulistiyohadi, Hartanti Dian Ikawati, Subangkit, Kartika Dewi Puspa, Nur Ika Hariastuti, Putri Widia Astuti, Nelis Imaningsih, IGM Wirabrata                                          |
| <b>hCoV-19/Indonesia/JB-GS-WJHL-ITB-NIHRD-W03778/2022</b> | EPI_ISL_13745626 | Helix Laboratorium       | West Java Health Laboratory; School of Life Sciences and Technology, Institut Teknologi Bandung; National Institute of Health Research & Development | Azzania Fibriani, Miftahul Faridl, Karimatu Khoirunnisa, Ema Rahmawati, Ryan Bayusantika Ristandi, Rifky Waluyajati Rachman, Cut Nur Cinthia Alamanda, Rini Robiani, Hadiana, Hana Apsari Pawestri, Nelis Imaningsih, Subangkit, IGM Wirabrata |
| <b>hCoV-19/Indonesia/JB-GS-WJHL-ITB-NIHRD-W03773/2022</b> | EPI_ISL_13745623 | Helix Laboratorium       | West Java Health Laboratory; School of Life Sciences and Technology, Institut Teknologi Bandung; National Institute of Health Research & Development | Azzania Fibriani, Miftahul Faridl, Karimatu Khoirunnisa, Ema Rahmawati, Ryan Bayusantika Ristandi, Rifky Waluyajati Rachman, Cut Nur Cinthia Alamanda, Rini Robiani, Hadiana, Hana Apsari Pawestri, Nelis Imaningsih, Subangkit, IGM Wirabrata |
| <b>hCoV-19/Indonesia/JB-GS-FKUNPAD-0445/2022</b>          | EPI_ISL_13783247 | Laboratorium RS Immanuel | Laboratorium Genetik Molekuler, Biomedik Lanjut, FK UNPAD                                                                                            | Yunia Sribudiani, Chrysanti Murad, Dwi Agustian, Lidya Chaidir,                                                                                                                                                                                |

|                                            |                  |          |   |                                                                                       |                                                                                       |                                                                                                                                                                                                                                                                                                                                                                                                                                                    |
|--------------------------------------------|------------------|----------|---|---------------------------------------------------------------------------------------|---------------------------------------------------------------------------------------|----------------------------------------------------------------------------------------------------------------------------------------------------------------------------------------------------------------------------------------------------------------------------------------------------------------------------------------------------------------------------------------------------------------------------------------------------|
|                                            |                  |          |   |                                                                                       |                                                                                       | Savira Ekawardhani, Nurul Setia Rahayu, Fensi Annalia, Jessi Annisa, Yeni Rendieni, Yanu, Shinta Nuni Haeruni, Ida Parwati, Tri Hanggono Ahmad                                                                                                                                                                                                                                                                                                     |
| IND/INSACOG-GBRC1397/2021                  | EPI_ISL_3162116  | OM846628 | ? |                                                                                       | ?                                                                                     | Kumar et al                                                                                                                                                                                                                                                                                                                                                                                                                                        |
| IND/CD211294/2021                          | EPI_ISL_2714697  | MW969755 | ? |                                                                                       | ?                                                                                     | Shrivastava et al                                                                                                                                                                                                                                                                                                                                                                                                                                  |
| HongKong/HKPU-00174/2020                   | ?                | MZ266523 | ? |                                                                                       | ?                                                                                     | Siu et al                                                                                                                                                                                                                                                                                                                                                                                                                                          |
| hCoV-19/HongKong/HK-HKPU-PUU038211539/2022 | EPI_ISL_13140549 |          |   | Department of Health Technology and Informatics, The Hong Kong Polytechnic University | Department of Health Technology and Informatics, The Hong Kong Polytechnic University | Gilman Kit-Hang Siu, Lam-Kwong Lee, Kenneth Siu-Sing Leung, Jake Siu-Lun Leung, Wing-Hei Lo, Timothy Ting-Leung Ng, Chloe Toi-Mei Chan, Ivan Tak-Fai Wong, Kingsley King-Gee Tam, Hiu-Yin Lao, Alan Ka-Lun Wu, Miranda Chong-Yee Yau, Yvette Wai-Man Lai, Kitty Sau-Chun Fung, Sandy Ka-Yee Chau, Barry Kin-Chung Wong, Wing-Kin To, Kristine Luk, Alex Yat-Man Ho, Tak-Lun Que, Kam-Tong Yip, Wing Cheong Yam, David Ho-Keung Shum, Shea Ping Yip |
| hCoV-19/HongKong/HK-HKPU-PUU038145226/2022 | EPI_ISL_13140493 |          |   | Department of Health Technology and Informatics, The Hong Kong Polytechnic University | Department of Health Technology and Informatics, The Hong Kong Polytechnic University | Gilman Kit-Hang Siu, Lam-Kwong Lee, Kenneth Siu-Sing Leung, Jake Siu-Lun Leung, Wing-Hei Lo, Timothy Ting-Leung Ng, Chloe Toi-Mei Chan, Ivan Tak-Fai Wong, Kingsley King-Gee Tam, Hiu-Yin Lao, Alan Ka-Lun Wu, Miranda Chong-Yee Yau, Yvette Wai-Man Lai, Kitty Sau-Chun Fung, Sandy Ka-Yee Chau, Barry Kin-Chung Wong, Wing-Kin To, Kristine Luk, Alex Yat-Man Ho, Tak-Lun Que, Kam-Tong Yip, Wing Cheong Yam, David Ho-Keung Shum, Shea Ping Yip |
| hCoV-19/HongKong/HK-HKPU-PUU038143347/2022 | EPI_ISL_13140494 |          |   | Department of Health Technology and Informatics, The Hong Kong Polytechnic University | Department of Health Technology and Informatics, The Hong Kong Polytechnic University | Gilman Kit-Hang Siu, Lam-Kwong Lee, Kenneth Siu-Sing Leung, Jake Siu-Lun Leung, Wing-Hei Lo, Timothy Ting-Leung Ng, Chloe Toi-Mei Chan, Ivan Tak-Fai Wong, Kingsley King-Gee Tam, Hiu-Yin Lao, Alan Ka-Lun Wu, Miranda Chong-Yee Yau, Yvette Wai-Man Lai, Kitty Sau-Chun Fung, Sandy Ka-Yee Chau, Barry Kin-Chung Wong, Wing-Kin To, Kristine Luk, Alex Yat-Man Ho, Tak-Lun Que, Kam-                                                              |

|                                            |                  |                                                                                       |                                                                                       |                                                                                                                                                                                                                                                                                                                                                                                                                                                                                                                     |
|--------------------------------------------|------------------|---------------------------------------------------------------------------------------|---------------------------------------------------------------------------------------|---------------------------------------------------------------------------------------------------------------------------------------------------------------------------------------------------------------------------------------------------------------------------------------------------------------------------------------------------------------------------------------------------------------------------------------------------------------------------------------------------------------------|
| hCoV-19/HongKong/HK-HKPU-PUU037449426/2022 | EPI_ISL_13140558 | Department of Health Technology and Informatics, The Hong Kong Polytechnic University | Department of Health Technology and Informatics, The Hong Kong Polytechnic University | Tong Yip, Wing Cheong Yam, David Ho-Keung Shum, Shea Ping Yip<br>Gilman Kit-Hang Siu, Lam-Kwong Lee, Kenneth Siu-Sing Leung, Jake Siu-Lun Leung, Wing-Hei Lo, Timothy Ting-Leung Ng, Chloe Toi-Mei Chan, Ivan Tak-Fai Wong, Kingsley King-Gee Tam, Hiu-Yin Lao, Alan Ka-Lun Wu, Miranda Chong-Yee Yau, Yvette Wai-Man Lai, Kitty Sau-Chun Fung, Sandy Ka-Yee Chau, Barry Kin-Chung Wong, Wing-Kin To, Kristine Luk, Alex Yat-Man Ho, Tak-Lun Que, Kam-Tong Yip, Wing Cheong Yam, David Ho-Keung Shum, Shea Ping Yip |
| hCoV-19/HongKong/HK-HKPU-PUU037300686/2022 | EPI_ISL_12812535 | Department of Health Technology and Informatics, The Hong Kong Polytechnic University | Department of Health Technology and Informatics, The Hong Kong Polytechnic University | Gilman Kit-Hang Siu, Lam-Kwong Lee, Kenneth Siu-Sing Leung, Jake Siu-Lun Leung, Wing-Hei Lo, Timothy Ting-Leung Ng, Chloe Toi-Mei Chan, Ivan Tak-Fai Wong, Kingsley King-Gee Tam, Hiu-Yin Lao, Alan Ka-Lun Wu, Miranda Chong-Yee Yau, Yvette Wai-Man Lai, Kitty Sau-Chun Fung, Sandy Ka-Yee Chau, Barry Kin-Chung Wong, Wing-Kin To, Kristine Luk, Alex Yat-Man Ho, Tak-Lun Que, Kam-Tong Yip, Wing Cheong Yam, David Ho-Keung Shum, Shea Ping Yip                                                                  |
| hCoV-19/HongKong/HK-HKPU-PUU037293374/2022 | EPI_ISL_13140316 | Department of Health Technology and Informatics, The Hong Kong Polytechnic University | Department of Health Technology and Informatics, The Hong Kong Polytechnic University | Gilman Kit-Hang Siu, Lam-Kwong Lee, Kenneth Siu-Sing Leung, Jake Siu-Lun Leung, Wing-Hei Lo, Timothy Ting-Leung Ng, Chloe Toi-Mei Chan, Ivan Tak-Fai Wong, Kingsley King-Gee Tam, Hiu-Yin Lao, Alan Ka-Lun Wu, Miranda Chong-Yee Yau, Yvette Wai-Man Lai, Kitty Sau-Chun Fung, Sandy Ka-Yee Chau, Barry Kin-Chung Wong, Wing-Kin To, Kristine Luk, Alex Yat-Man Ho, Tak-Lun Que, Kam-Tong Yip, Wing Cheong Yam, David Ho-Keung Shum, Shea Ping Yip                                                                  |
| hCoV-19/HongKong/HK-HKPU-PUU037225137/2022 | EPI_ISL_12839558 | Department of Health Technology and Informatics, The Hong Kong Polytechnic University | Department of Health Technology and Informatics, The Hong Kong Polytechnic University | Gilman Kit-Hang Siu, Lam-Kwong Lee, Kenneth Siu-Sing Leung, Jake Siu-Lun Leung, Wing-Hei Lo, Timothy Ting-Leung Ng, Chloe Toi-Mei Chan, Ivan Tak-Fai Wong, Kingsley                                                                                                                                                                                                                                                                                                                                                 |

|  |  |  |  |                                                                                                                                                                                                                                                                                |
|--|--|--|--|--------------------------------------------------------------------------------------------------------------------------------------------------------------------------------------------------------------------------------------------------------------------------------|
|  |  |  |  | King-Gee Tam, Hiu-Yin Lao, Alan Ka-Lun Wu, Miranda Chong-Yee Yau, Yvette Wai-Man Lai, Kitty Sau-Chun Fung, Sandy Ka-Yee Chau, Barry Kin-Chung Wong, Wing-Kin To, Kristine Luk, Alex Yat-Man Ho, Tak-Lun Que, Kam-Tong Yip, Wing Cheong Yam, David Ho-Keung Shum, Shea Ping Yip |
|--|--|--|--|--------------------------------------------------------------------------------------------------------------------------------------------------------------------------------------------------------------------------------------------------------------------------------|

|                                            |                  |                                                                                       |                                                                                       |                                                                                                                                                                                                                                                                                                                                                                                                                                                    |
|--------------------------------------------|------------------|---------------------------------------------------------------------------------------|---------------------------------------------------------------------------------------|----------------------------------------------------------------------------------------------------------------------------------------------------------------------------------------------------------------------------------------------------------------------------------------------------------------------------------------------------------------------------------------------------------------------------------------------------|
| hCoV-19/HongKong/HK-HKPU-PUU037168354/2022 | EPI_ISL_12810066 | Department of Health Technology and Informatics, The Hong Kong Polytechnic University | Department of Health Technology and Informatics, The Hong Kong Polytechnic University | Gilman Kit-Hang Siu, Lam-Kwong Lee, Kenneth Siu-Sing Leung, Jake Siu-Lun Leung, Wing-Hei Lo, Timothy Ting-Leung Ng, Chloe Toi-Mei Chan, Ivan Tak-Fai Wong, Kingsley King-Gee Tam, Hiu-Yin Lao, Alan Ka-Lun Wu, Miranda Chong-Yee Yau, Yvette Wai-Man Lai, Kitty Sau-Chun Fung, Sandy Ka-Yee Chau, Barry Kin-Chung Wong, Wing-Kin To, Kristine Luk, Alex Yat-Man Ho, Tak-Lun Que, Kam-Tong Yip, Wing Cheong Yam, David Ho-Keung Shum, Shea Ping Yip |
|--------------------------------------------|------------------|---------------------------------------------------------------------------------------|---------------------------------------------------------------------------------------|----------------------------------------------------------------------------------------------------------------------------------------------------------------------------------------------------------------------------------------------------------------------------------------------------------------------------------------------------------------------------------------------------------------------------------------------------|

|                                            |                  |                                                                                       |                                                                                       |                                                                                                                                                                                                                                                                                                                                                                                                                                                    |
|--------------------------------------------|------------------|---------------------------------------------------------------------------------------|---------------------------------------------------------------------------------------|----------------------------------------------------------------------------------------------------------------------------------------------------------------------------------------------------------------------------------------------------------------------------------------------------------------------------------------------------------------------------------------------------------------------------------------------------|
| hCoV-19/HongKong/HK-HKPU-PUU010577490/2022 | EPI_ISL_12810123 | Department of Health Technology and Informatics, The Hong Kong Polytechnic University | Department of Health Technology and Informatics, The Hong Kong Polytechnic University | Gilman Kit-Hang Siu, Lam-Kwong Lee, Kenneth Siu-Sing Leung, Jake Siu-Lun Leung, Wing-Hei Lo, Timothy Ting-Leung Ng, Chloe Toi-Mei Chan, Ivan Tak-Fai Wong, Kingsley King-Gee Tam, Hiu-Yin Lao, Alan Ka-Lun Wu, Miranda Chong-Yee Yau, Yvette Wai-Man Lai, Kitty Sau-Chun Fung, Sandy Ka-Yee Chau, Barry Kin-Chung Wong, Wing-Kin To, Kristine Luk, Alex Yat-Man Ho, Tak-Lun Que, Kam-Tong Yip, Wing Cheong Yam, David Ho-Keung Shum, Shea Ping Yip |
|--------------------------------------------|------------------|---------------------------------------------------------------------------------------|---------------------------------------------------------------------------------------|----------------------------------------------------------------------------------------------------------------------------------------------------------------------------------------------------------------------------------------------------------------------------------------------------------------------------------------------------------------------------------------------------------------------------------------------------|

|                                            |                  |                                                                                       |                                                                                       |                                                                                                                                                                                                                                                                                                                                                                                                            |
|--------------------------------------------|------------------|---------------------------------------------------------------------------------------|---------------------------------------------------------------------------------------|------------------------------------------------------------------------------------------------------------------------------------------------------------------------------------------------------------------------------------------------------------------------------------------------------------------------------------------------------------------------------------------------------------|
| hCoV-19/HongKong/HK-HKPU-PUU003146974/2022 | EPI_ISL_12812523 | Department of Health Technology and Informatics, The Hong Kong Polytechnic University | Department of Health Technology and Informatics, The Hong Kong Polytechnic University | Gilman Kit-Hang Siu, Lam-Kwong Lee, Kenneth Siu-Sing Leung, Jake Siu-Lun Leung, Wing-Hei Lo, Timothy Ting-Leung Ng, Chloe Toi-Mei Chan, Ivan Tak-Fai Wong, Kingsley King-Gee Tam, Hiu-Yin Lao, Alan Ka-Lun Wu, Miranda Chong-Yee Yau, Yvette Wai-Man Lai, Kitty Sau-Chun Fung, Sandy Ka-Yee Chau, Barry Kin-Chung Wong, Wing-Kin To, Kristine Luk, Alex Yat-Man Ho, Tak-Lun Que, Kam-Tong Yip, Wing Cheong |
|--------------------------------------------|------------------|---------------------------------------------------------------------------------------|---------------------------------------------------------------------------------------|------------------------------------------------------------------------------------------------------------------------------------------------------------------------------------------------------------------------------------------------------------------------------------------------------------------------------------------------------------------------------------------------------------|



|                                           |                  |                                                                                             |                                                                                       |                                                                                                                                                                                                                                                                                                                                                                                                                                                                                                  |
|-------------------------------------------|------------------|---------------------------------------------------------------------------------------------|---------------------------------------------------------------------------------------|--------------------------------------------------------------------------------------------------------------------------------------------------------------------------------------------------------------------------------------------------------------------------------------------------------------------------------------------------------------------------------------------------------------------------------------------------------------------------------------------------|
| hCoV-19/HongKong/HK-KPU-PUB061691447/2022 | EPI_ISL_12419269 | Department of Health Technology and Informatics, The Hong Kong Polytechnic University       | Department of Health Technology and Informatics, The Hong Kong Polytechnic University | Yam, David Ho-Keung<br>Shum, Shea Ping Yip<br>Gilman Yit-Hang Siu, Lam-Kwong Lee, Yenneth Siu-Sing Leung, Jake Siu-Lun Leung, Wing-Hei Lo, Timothy Ting-Leung Ng, Chloe Toi-Mei Chan, Ivan Tak-Fai Wong, Kingsley King-Gee Tam, Hiu-Yin Lao, Alan Ka-Lun Wu, Miranda Chong-Yee Yau, Yvette Wai-Man Lai, Kitty Sau-Chun Fung, Sandy Ka-Yee Chau, Barry Kin-Chung Wong, Wing-Kin To, Kristine Luk, Alex Yat-Man Ho, Tak-Lun Que, Kam-Tong Yip, Wing Cheong Yam, David Ho-Keung Shum, Shea Ping Yip |
| hCoV-19/HongKong/CM220 01347/2022         | EPI_ISL_12912012 | Temporary Specimen Collection Centre at the AsiaWorld-Expo, Hong Kong International Airport | Hong Kong Department of Health                                                        | Alan K.L. Tsang, Peter C.W. Yip, Patricia K. L. Leung, Ken H.L. Ng, Edman T.K. Lam, Rickjason C.W. Chan                                                                                                                                                                                                                                                                                                                                                                                          |
| hCoV-19/HongKong/CM220 01345/2022         | EPI_ISL_12912010 | Temporary Specimen Collection Centre at the AsiaWorld-Expo, Hong Kong International Airport | Hong Kong Department of Health                                                        | Alan K.L. Tsang, Peter C.W. Yip, Patricia K. L. Leung, Ken H.L. Ng, Edman T.K. Lam, Rickjason C.W. Chan                                                                                                                                                                                                                                                                                                                                                                                          |
| hCoV-19/HongKong/CM220 01339/2022         | EPI_ISL_12912007 | Temporary Specimen Collection Centre at the AsiaWorld-Expo, Hong Kong International Airport | Hong Kong Department of Health                                                        | Alan K.L. Tsang, Peter C.W. Yip, Patricia K. L. Leung, Ken H.L. Ng, Edman T.K. Lam, Rickjason C.W. Chan                                                                                                                                                                                                                                                                                                                                                                                          |
| hCoV-19/HongKong/CM220 01334/2022         | EPI_ISL_12912002 | Home Quarantine Taskforce, Centre for Health Protection                                     | Hong Kong Department of Health                                                        | Alan K.L. Tsang, Peter C.W. Yip, Patricia K. L. Leung, Ken H.L. Ng, Edman T.K. Lam, Rickjason C.W. Chan                                                                                                                                                                                                                                                                                                                                                                                          |
| hCoV-19/HongKong/CM220 01281/2022         | EPI_ISL_12911970 | Home Quarantine Taskforce, Centre for Health Protection                                     | Hong Kong Department of Health                                                        | Alan K.L. Tsang, Peter C.W. Yip, Patricia K. L. Leung, Ken H.L. Ng, Edman T.K. Lam, Rickjason C.W. Chan                                                                                                                                                                                                                                                                                                                                                                                          |
| hCoV-19/HongKong/CM220 01279/2022         | EPI_ISL_12911968 | Home Quarantine Taskforce, Centre for Health Protection                                     | Hong Kong Department of Health                                                        | Alan K.L. Tsang, Peter C.W. Yip, Patricia K. L. Leung, Ken H.L. Ng, Edman T.K. Lam, Rickjason C.W. Chan                                                                                                                                                                                                                                                                                                                                                                                          |
| hCoV-19/HongKong/CM220 01023/2022         | EPI_ISL_12693687 | Temporary Specimen Collection Centre at the AsiaWorld-Expo                                  | Public Health Laboratory Centre, Hong Kong Department of Health                       | Alan K.L. Tsang, Peter C.W. Yip, Patricia K. L. Leung, Ken H.L. Ng, Edman T.K. Lam, Rickjason C.W. Chan                                                                                                                                                                                                                                                                                                                                                                                          |
| hCoV-19/HongKong/CM220 00997/2022         | EPI_ISL_12537872 | Home Quarantine Taskforce                                                                   | Hong Kong Department of Health                                                        | Alan K.L. Tsang, Peter C.W. Yip, Patricia K. L. Leung, Ken H.L. Ng, Edman T.K. Lam, Rickjason C.W. Chan                                                                                                                                                                                                                                                                                                                                                                                          |
| hCoV-19/HongKong/CM220 00988/2022         | EPI_ISL_12537858 | Temporary Specimen Collection Centre at the AsiaWorld-Expo                                  | Hong Kong Department of Health                                                        | Alan K.L. Tsang, Peter C.W. Yip, Patricia K. L. Leung, Ken H.L. Ng, Edman T.K. Lam, Rickjason C.W. Chan                                                                                                                                                                                                                                                                                                                                                                                          |
| hCoV-19/HongKong/CM220 00705/2022         | EPI_ISL_12138136 | Temporary Specimen Collection Centre at the AsiaWorld-Expo                                  | Hong Kong Department of Health                                                        | Alan K.L. Tsang, Peter C.W. Yip, Patricia K. L. Leung, Ken H.L. Ng, Edman T.K. Lam, Rickjason C.W. Chan                                                                                                                                                                                                                                                                                                                                                                                          |
| hCoV-19/HongKong/CH220 24474/2022         | EPI_ISL_12771763 | QC CALL CENTRE                                                                              | Hong Kong Department of Health                                                        | Alan K.L. Tsang, Peter C.W. Yip, Patricia K. L. Leung, Ken H.L. Ng, Edman T.K. Lam, Rickjason C.W. Chan                                                                                                                                                                                                                                                                                                                                                                                          |

|                                                |                  |          |                                                                   |                                                                                                                                                           |                                                                                                                                                                                                                                                                                                                              |
|------------------------------------------------|------------------|----------|-------------------------------------------------------------------|-----------------------------------------------------------------------------------------------------------------------------------------------------------|------------------------------------------------------------------------------------------------------------------------------------------------------------------------------------------------------------------------------------------------------------------------------------------------------------------------------|
| <b>hCoV-19/Germany/BW-RKI-I-829764/2022</b>    | EPI_ISL_13011779 |          | SYNLAB MVZ Leinfelden-Echterdingen                                | Robert Koch Institute                                                                                                                                     | unknown                                                                                                                                                                                                                                                                                                                      |
| <b>hCoV-19/Germany/BE-RKI-I-849151/2022</b>    | EPI_ISL_13244595 |          | MDI Limbach Berlin GmbH; MVZ Labor Berlin                         | Robert Koch Institute                                                                                                                                     | unknown                                                                                                                                                                                                                                                                                                                      |
| <b>hCoV-19/France/IDF-HMN-22052111210/2022</b> | EPI_ISL_13076374 |          | BIOCLINIC SAINT MAUR                                              | Department of Virology, Henri Mondor University Hospital, Assistance Publique H, äö-•pitaux de Paris, Universit, äö-© Paris-Est Cr, äö-©teil, INSERM U955 | Christophe Rodriguez, Slim Fourati, Vanessa Demontant, Guillaume Gricourt, Melissa NDebi, Alexandre Soulier, Elisabeth Trawinski, Jean-Michel Pawlotsky                                                                                                                                                                      |
| <b>hCoV-19/France/ARA-HMN-22062241398/2022</b> | EPI_ISL_13853966 |          | STMARTINS ORIADE                                                  | Department of Virology, Henri Mondor University Hospital, Assistance Publique H, äö-•pitaux de Paris, Universit, äö-© Paris-Est Cr, äö-©teil, INSERM U955 | Christophe Rodriguez, Slim Fourati, Vanessa Demontant, Guillaume Gricourt, Melissa NDebi, Alexandre Soulier, Elisabeth Trawinski, Jean-Michel Pawlotsky                                                                                                                                                                      |
| <b>hCoV-19/France/ARA-HCL722003303401/2022</b> | EPI_ISL_13877582 | ?        | LABORATOIRE NOVELAB                                               | CNR Virus des infections Respiratoires - France SUD                                                                                                       | Antonin Bal, Bruno Simon, Theophile Boyer, Gregory Destras, Gwendolyne Burfin, Hadrien Regue, Quentin Semanas, Martine Valette, Bruno Lina, Laurence Josset                                                                                                                                                                  |
| <b>FRA/IHUCOVID-012678_Nova1/2020</b>          | ?                | ON298268 | ?                                                                 | ?                                                                                                                                                         | Levasseur et al                                                                                                                                                                                                                                                                                                              |
| <b>FRA/IHUCOVID-003240-1/2021</b>              | EPI_ISL_1020400  | ON442169 | ?                                                                 | ?                                                                                                                                                         | Levasseur et al                                                                                                                                                                                                                                                                                                              |
| <b>FRA/IHUCOVID-000496_Illu2/2020</b>          | EPI_ISL_2596805  | ON286323 | ?                                                                 | ?                                                                                                                                                         | Levasseur et al                                                                                                                                                                                                                                                                                                              |
| <b>England/RAND-15242CC/2021</b>               | EPI_ISL_1985276  | OU266353 | Radox Laboratories                                                | Wellcome Sanger Institute                                                                                                                                 | Radox et al                                                                                                                                                                                                                                                                                                                  |
| <b>England/QEUIH-B11E25/2020</b>               | EPI_ISL_642541   | OB991508 | Lighthouse Lab in Glasgow                                         | Wellcome Sanger Institute                                                                                                                                 | VanSteenhouse et al                                                                                                                                                                                                                                                                                                          |
| <b>England/QEUIH-AD246B/2020</b>               | EPI_ISL_634112   | OB989962 | Lighthouse Lab in Glasgow                                         | Wellcome Sanger Institute                                                                                                                                 | VanSteenhouse et al                                                                                                                                                                                                                                                                                                          |
| <b>England/QEUIH-95F704/2020</b>               | EPI_ISL_532423   | OA969870 | Lighthouse Lab in Glasgow                                         | Wellcome Sanger Institute                                                                                                                                 | VanSteenhouse et al                                                                                                                                                                                                                                                                                                          |
| <b>hCoV-19/England/QEUIH-3DE0273/2022</b>      | EPI_ISL_12547840 |          | Lighthouse Lab in Glasgow                                         | Wellcome Sanger Institute for the COVID-19 Genomics UK (COG-UK) Consortium                                                                                | Harper VanSteenhouse, Yumi Kasai, David Gray, Carol Clugston, Anna Dominiczak and Alex Alderton, Roberto Amato, Jeffrey Barrett, Sonia Goncalves, Ewan Harrison, David K. Jackson, Ian Johnston, Dominic Kwiatkowski, Cordelia Langford, John Sillitoe on behalf of the Wellcome Sanger Institute COVID-19 Surveillance Team |
| <b>England/QEUIH-153B1D4/2021</b>              | EPI_ISL_2005000  | OU270509 | Lighthouse Lab in Glasgow                                         | Wellcome Sanger Institute                                                                                                                                 | VanSteenhouse et al                                                                                                                                                                                                                                                                                                          |
| <b>England/QEUIH-11CAB23/2021</b>              | EPI_ISL_957130   | OD964610 | Lighthouse Lab in Glasgow                                         | Wellcome Sanger Institute                                                                                                                                 | VanSteenhouse et al                                                                                                                                                                                                                                                                                                          |
| <b>England/PLYM-204528/2021</b>                | EPI_ISL_5021200  | OU844323 | Lighthouse Laboratory Plymouth                                    | Wellcome Sanger Institute                                                                                                                                 | Lighthouse Laboratory et al                                                                                                                                                                                                                                                                                                  |
| <b>England/NORT-2518A3/2020</b>                | EPI_ISL_488783   | OA965074 | NU-OMICS DNA Sequencing research facility, Northumbria University | Wellcome Sanger Institute                                                                                                                                 | Duncan et al                                                                                                                                                                                                                                                                                                                 |

|                                  |                     |              |                                                                                          |                                                              |                                    |
|----------------------------------|---------------------|--------------|------------------------------------------------------------------------------------------|--------------------------------------------------------------|------------------------------------|
| England/MILK-9A54AE/2020         | EPI_ISL_55<br>0143  | OA972543     | Lighthouse Lab in Milton Keynes                                                          | Wellcome Sanger Institute                                    | The Lighthouse Lab in Milton et al |
| England/MILK-9757AE/2020         | EPI_ISL_55<br>2482  | OA974655     | Lighthouse Lab in Milton Keynes                                                          | Wellcome Sanger Institute                                    | The Lighthouse Lab in Milton et al |
| England/MILK-654289/2020         | EPI_ISL_55<br>8030  | OA980217     | Lighthouse Lab in Milton Keynes                                                          | Wellcome Sanger Institute                                    | The Lighthouse Lab in Milton et al |
| England/MILK-62D81E/2020         | EPI_ISL_55<br>7953  | OA980218     | Lighthouse Lab in Milton Keynes                                                          | Wellcome Sanger Institute                                    | The Lighthouse Lab in Milton et al |
| England/MILK-30847CA/2021        | EPI_ISL_84<br>45018 | OV413443     | Lighthouse Lab in Milton Keynes                                                          | Wellcome Sanger Institute                                    | The Lighthouse Lab in Milton et al |
| England/MILK-1FE9180/2021        | EPI_ISL_48<br>93890 | OU832281     | Lighthouse Lab in Milton Keynes                                                          | Wellcome Sanger Institute                                    | The Lighthouse Lab in Milton et al |
| England/MILK-1FD2E47/2021        | EPI_ISL_48<br>97753 | OU828525     | Lighthouse Lab in Milton Keynes                                                          | Wellcome Sanger Institute                                    | The Lighthouse Lab in Milton et al |
| England/MILK-1FD3D0/2021         | EPI_ISL_47<br>55259 | OU794998     | Lighthouse Lab in Milton Keynes                                                          | Wellcome Sanger Institute                                    | The Lighthouse Lab in Milton et al |
| England/MILK-154F9E4/2021        | EPI_ISL_19<br>86586 | OU266945     | Lighthouse Lab in Milton Keynes                                                          | Wellcome Sanger Institute                                    | The Lighthouse Lab in Milton et al |
| England/MILK-11694BA/2021        | EPI_ISL_93<br>8922  | OD955471     | Lighthouse Lab in Milton Keynes                                                          | Wellcome Sanger Institute                                    | The Lighthouse Lab in Milton et al |
| England/CAMC-B52101/2020         | EPI_ISL_65<br>7793  | OB999781     | Lighthouse Lab in Cambridge                                                              | Wellcome Sanger Institute                                    | Howes et al                        |
| England/CAMC-145BB4A/2021        | EPI_ISL_14<br>73723 | OU215329     | Lighthouse Lab in Cambridge                                                              | Wellcome Sanger Institute                                    | Howes et al                        |
| England/CAMC-133BC8A/2021        | EPI_ISL_18<br>31442 | OU263813     | Lighthouse Lab in Cambridge                                                              | Wellcome Sanger Institute                                    | Howes et al                        |
| England/CAMB-84BD6/2020          | EPI_ISL_44<br>0515  | FR996847     | Department of Pathology, University of Cambridge                                         | Wellcome Sanger Institute                                    | Meredith et al                     |
| England/BRBR-1995B5E/2021        | EPI_ISL_30<br>93043 | OU457630     | Department of Pathology, Berkshire and Surrey Pathology Services Lighthouse Laboratory   | Wellcome Sanger Institute                                    | Berkshire et al                    |
| England/ALDP-C39275/2020         | EPI_ISL_73<br>1487  | OD909555     | Lighthouse Lab in Alderley Park                                                          | Wellcome Sanger Institute                                    | Wynn et al                         |
| England/ALDP-C062CC/2020         | EPI_ISL_70<br>9427  | OD905007     | Lighthouse Lab in Alderley Park                                                          | Wellcome Sanger Institute                                    | Wynn et al                         |
| England/ALDP-2DAB426/2021        | EPI_ISL_76<br>25201 | OV454532     | Lighthouse Lab in Alderley Park                                                          | Wellcome Sanger Institute                                    | Wynn et al                         |
| England/ALDP-20242EC/2021        | EPI_ISL_50<br>27976 | OU850730     | Lighthouse Lab in Alderley Park                                                          | Wellcome Sanger Institute                                    | Wynn et al                         |
| England/ALDP-1651720/2021        | EPI_ISL_25<br>41661 | OU334042     | Lighthouse Lab in Alderley Park                                                          | Wellcome Sanger Institute                                    | Wynn et al                         |
| England/ALDP-154FF3D/2021        | EPI_ISL_19<br>86886 | OU267164     | Lighthouse Lab in Alderley Park                                                          | Wellcome Sanger Institute                                    | Wynn et al                         |
| England/ALDP-1490C28/2021        | EPI_ISL_14<br>88833 | OU226240     | Lighthouse Lab in Alderley Park                                                          | Wellcome Sanger Institute                                    | Wynn et al                         |
| England/ALDP-12AB891/2021        | EPI_ISL_10<br>61906 | OU993942     | Lighthouse Lab in Alderley Park                                                          | Wellcome Sanger Institute                                    | Wynn et al                         |
| England/ALDP-10F9B51/2021        | EPI_ISL_91<br>7632  | OD951405     | Lighthouse Lab in Alderley Park                                                          | Wellcome Sanger Institute                                    | Wynn et al                         |
| England/ALDP-10317A3/2021        | EPI_ISL_88<br>0535  | OD942732     | Lighthouse Lab in Alderley Park                                                          | Wellcome Sanger Institute                                    | Wynn et al                         |
| EGY/CUJNCI-H3C91014/2020         | EPI_ISL_90<br>7067  | MW54744<br>2 | ?                                                                                        | ?                                                            | Zekri et al                        |
| FGI/CHE57357_W3_A088/2021        | ?                   | OK001882     | ?                                                                                        | ?                                                            | Hatem et al                        |
| DEU/NRW-06/2020                  | EPI_ISL_41<br>4505  | MT582494     | Center of Medical Microbiology, Virology, and Hospital Hygiene, University of Dusseldorf | Heinrich Heine University                                    | Houwaart et al                     |
| DEU/C1791/2021                   | ?                   | OM46244<br>2 | ?                                                                                        | ?                                                            | Kieninger et al                    |
| hCoV-19/Denmark/DCGC-527922/2022 | EPI_ISL_13299190    |              | Department of Bacteria, Parasites and Fungi,                                             | Statens Serum Institut Bioinformatics and Microbial Genomics | Danish Covid-19 Genome Consortium  |

|                                           |                  |          |                                                                                          |                                                                        |                                                                                                                                                                                                                                                                                                      |
|-------------------------------------------|------------------|----------|------------------------------------------------------------------------------------------|------------------------------------------------------------------------|------------------------------------------------------------------------------------------------------------------------------------------------------------------------------------------------------------------------------------------------------------------------------------------------------|
|                                           |                  |          | Statens Serum Institut, Copenhagen, Denmark                                              |                                                                        |                                                                                                                                                                                                                                                                                                      |
| <b>hCoV-19/Denmark/DCGC-526165/2022</b>   | EPI_ISL_13178888 |          | Department of Bacteria, Parasites and Fungi, Statens Serum Institut, Copenhagen, Denmark | Statens Serum Institut Bioinformatics and Microbial Genomics           | Danish Covid-19 Genome Consortium                                                                                                                                                                                                                                                                    |
| <b>Denmark/DCGC-525453/2022</b>           | ?                | OX209628 | Department of Bacteria, Parasites and Fungi, Statens Serum Institut, Copenhagen, Denmark | statens serum institut and the danish covid19 genome consortium (dcgc) | Danish Covid-19 Genome et al                                                                                                                                                                                                                                                                         |
| <b>Denmark/DCGC-519203/2022</b>           | ?                | OX205413 | Department of Bacteria, Parasites and Fungi, Statens Serum Institut, Copenhagen, Denmark | statens serum institut and the danish covid19 genome consortium (dcgc) | Danish Covid-19 Genome et al                                                                                                                                                                                                                                                                         |
| <b>hCoV-19/Denmark/DCGC-518675/2022</b>   | EPI_ISL_12895962 |          | Department of Bacteria, Parasites and Fungi, Statens Serum Institut, Copenhagen, Denmark | Statens Serum Institut Bioinformatics and Microbial Genomics           | Danish Covid-19 Genome Consortium                                                                                                                                                                                                                                                                    |
| <b>hCoV-19/Denmark/DCGC-518156/2022</b>   | EPI_ISL_12895448 |          | Department of Bacteria, Parasites and Fungi, Statens Serum Institut, Copenhagen, Denmark | Statens Serum Institut Bioinformatics and Microbial Genomics           | Danish Covid-19 Genome Consortium                                                                                                                                                                                                                                                                    |
| <b>hCoV-19/Denmark/DCGC-516956/2022</b>   | EPI_ISL_12811161 |          | Department of Bacteria, Parasites and Fungi, Statens Serum Institut, Copenhagen, Denmark | Statens Serum Institut Bioinformatics and Microbial Genomics           | Danish Covid-19 Genome Consortium                                                                                                                                                                                                                                                                    |
| <b>hCoV-19/Denmark/DCGC-506132/2022</b>   | EPI_ISL_12534001 |          | Department of Bacteria, Parasites and Fungi, Statens Serum Institut, Copenhagen, Denmark | Statens Serum Institut Bioinformatics and Microbial Genomics           | Danish Covid-19 Genome Consortium                                                                                                                                                                                                                                                                    |
| <b>Denmark/DCGC-506024/2022</b>           | ?                | OX195660 | Department of Bacteria, Parasites and Fungi, Statens Serum Institut, Copenhagen, Denmark | statens serum institut and the danish covid19 genome consortium (dcgc) | Danish Covid-19 Genome et al                                                                                                                                                                                                                                                                         |
| <b>Denmark/DCGC-447615/2022</b>           | ?                | OX121053 | Department of Bacteria, Parasites and Fungi, Statens Serum Institut, Copenhagen, Denmark | statens serum institut and the danish covid19 genome consortium (dcgc) | Danish Covid-19 Genome et al                                                                                                                                                                                                                                                                         |
| <b>Denmark/DCGC-446089/2022</b>           | ?                | OX119393 | Department of Bacteria, Parasites and Fungi, Statens Serum Institut, Copenhagen, Denmark | statens serum institut and the danish covid19 genome consortium (dcgc) | Danish Covid-19 Genome et al                                                                                                                                                                                                                                                                         |
| <b>Denmark/DCGC-127684/2021</b>           | EPI_ISL_2972615  | CV917415 | Department of Bacteria, Parasites and Fungi, Statens Serum Institut, Copenhagen, Denmark | statens serum institut and the danish covid19 genome consortium (dcgc) | Danish Covid-19 Genome et al                                                                                                                                                                                                                                                                         |
| <b>hCoV-19/Chile/rw-52265/2022</b>        | EPI_ISL_12688039 |          | Genetica Molecular and Subdepartamento de Virologia ISP Chile                            | Instituto de Salud Publica de Chile                                    | Karen Orostica, Constanza Campano, Marcelo Rojas, Barbara Parra, Patricia Bustos, Rodrigo Fasce, Andres Castillo, Matias Pezoa, Ivan Ponce, Jorge Fernandez                                                                                                                                          |
| <b>hCoV-19/Canada/ON-PHL-22-2167/2022</b> | EPI_ISL_12881278 |          | Public Health Ontario Laboratory                                                         | Public Health Ontario Laboratory                                       | Jacob Afelskie, Rebecca Azzaro, Doonia Bajovic, Philip Banh, Claudia Chu, Kirby Cronin, Rachelle DiTullio, Carla Duncan, Dhiraj Gaglani, Mark Horsman, Hadia Hussain, Jason Iraheta, Grace Jeong, Sushma Kavikondala, Lisa Kim, Surendra Kumar, Aimin Li, Maria Mariscal, Alex Marchand-Austin, Dean |

|                                            |                  |                                                         |                                                          |                                                                                                                                                                                                                                                                                                                                                                                                                                                                               |
|--------------------------------------------|------------------|---------------------------------------------------------|----------------------------------------------------------|-------------------------------------------------------------------------------------------------------------------------------------------------------------------------------------------------------------------------------------------------------------------------------------------------------------------------------------------------------------------------------------------------------------------------------------------------------------------------------|
|                                            |                  |                                                         |                                                          | Maxwell, Lisa McTaggart, Fatima Merza, Esther Nagai, Pima Palencia, John Palmer, Samir N Patel, Nataliya Potapova, Anna Puzinovici, Zarah Rajaei, Christina Rampertab, Himeshi Samarsinghe, Candice Schreiber, Narisha Shakuralli, Christine Seah, Karthikeyan Sivaraman, Fatemeh Shaeri, Natasha Sing, Vincent Su Bin Cha, Ashleigh Sullivan, Sarah Teatero, Semra Tibebe, Nobish Varghese, Brandon Ye, Andre Villegas, Jesse Wang, Sophie Yu                                |
| <b>hCoV-19/Canada/NL-PHML-449070/2022</b>  | EPI_ISL_13429304 | NL-Dr. Leonardo A. Miller<br>Centre for Health Services | Newfoundland and Labrador - Eastern Health               | Anna Majer, Shari Tyson, Grace Seo, Philip Mabon, Elsie Grudeski, Rhiannon Huzarewich, Russell Mandes, Anneliese Landgraft, Jennifer Tanner, Natalie Knox, Morag Graham, Gary Van Domselaar, Robert Needle, Yang Yu, George Zahariadis, Phil Andrews, Christopher Corkum, Geoffrey Woodland, Nathalie Bastien, Yan Li, Timothy Booth, Darian Hole, Madison Chapel, Ana Duggan, Kirsten Biggar, CanCOGENs metadata curation team, Public Health Agency of Canada CanCOGEN team |
| <b>hCoV-19/Canada/BC-BCCDC-450890/2022</b> | EPI_ISL_13412609 | British Columbia Centre For Disease Control             | B.C. Centre for Disease Control Public Health Laboratory | Prystajecy Natalie, Linda Hoang, Dan Fornika, John Tyson, Shannon Russell, Kim Macdonald, Kimia Kamelian, James Zlosnik, Ana Pacagnella, Corrinne Ng, Loretta Janz, Robert Azana, Mel Kraiden                                                                                                                                                                                                                                                                                 |
| <b>hCoV-19/Canada/BC-BCCDC-450325/2022</b> | EPI_ISL_13412156 | British Columbia Centre For Disease Control             | B.C. Centre for Disease Control Public Health Laboratory | Prystajecy Natalie, Linda Hoang, Dan Fornika, John Tyson, Shannon Russell, Kim Macdonald, Kimia Kamelian, James Zlosnik, Ana Pacagnella, Corrinne Ng, Loretta Janz, Robert Azana, Mel Kraiden                                                                                                                                                                                                                                                                                 |
| <b>hCoV-19/Canada/BC-BCCDC-452235/2022</b> | EPI_ISL_13320726 | British Columbia Centre For Disease Control             | B.C. Centre for Disease Control Public Health Laboratory | Prystajecy Natalie, Linda Hoang, Dan Fornika, John Tyson, Shannon Russell, Kim Macdonald, Kimia Kamelian, James Zlosnik, Ana Pacagnella, Corrinne Ng, Loretta Janz, Robert Azana, Mel Kraiden                                                                                                                                                                                                                                                                                 |

|                                               |                  |          |                                                                                                     |                                                                                                                                   |                                                                                                                                                                         |
|-----------------------------------------------|------------------|----------|-----------------------------------------------------------------------------------------------------|-----------------------------------------------------------------------------------------------------------------------------------|-------------------------------------------------------------------------------------------------------------------------------------------------------------------------|
| <b>hCoV-19/Cambodia/g0621047/2022</b>         | EPI_ISL_13613167 |          | Virology Unit, Institut Pasteur du Cambodge (IPC)                                                   | Virology Unit, Institut Pasteur du Cambodge (IPC)                                                                                 | Leakhena Pum, Sophoannadeth Rath, Cecile Troupin, Jurre Y Siegers, Ly Sovann, Kraing Sidonn, Yi Sengouneurn, Chin Savuth, Chau Darapheak, Veasna Duong, Erik A Karlsson |
| <b>hCoV-19/Cambodia/g0616117/2022</b>         | EPI_ISL_13613162 |          | Virology Unit, Institut Pasteur du Cambodge (IPC)                                                   | Virology Unit, Institut Pasteur du Cambodge (IPC)                                                                                 | Leakhena Pum, Sophoannadeth Rath, Cecile Troupin, Jurre Y Siegers, Ly Sovann, Kraing Sidonn, Yi Sengouneurn, Chin Savuth, Chau Darapheak, Veasna Duong, Erik A Karlsson |
| <b>BRA/SP-NXBS1644GENOV827672305963/2021</b>  | EPI_ISL_4415938  | ON576167 | ?                                                                                                   | ?                                                                                                                                 | Guarischiet al                                                                                                                                                          |
| <b>BRA/GO-NVBS2560GENOV700800055209/2021</b>  | EPI_ISL_4423895  | ON576898 | ?                                                                                                   | ?                                                                                                                                 | Guarischiet al                                                                                                                                                          |
| <b>BGD/ideSHi-TR-673/2021</b>                 | EPI_ISL_1915113  | MZ413856 | ?                                                                                                   | ?                                                                                                                                 | Afrad et al                                                                                                                                                             |
| <b>hCoV-19/Austria/LB-R00087-5250/2022</b>    | EPI_ISL_13826133 |          | Lifebrain Covid Labor GmbH                                                                          | Lifebrain Covid Labor GmbH                                                                                                        | Filip Sima, Alexandra Wagner, Kristina Bavrka Kolenc, Lucia Castello, Anna Edermayr                                                                                     |
| <b>hCoV-19/Austria/LB-R00087-5007/2022</b>    | EPI_ISL_13825898 |          | Lifebrain Covid Labor GmbH                                                                          | Lifebrain Covid Labor GmbH                                                                                                        | Filip Sima, Alexandra Wagner, Kristina Bavrka Kolenc, Lucia Castello, Anna Edermayr                                                                                     |
| <b>hCoV-19/Australia/VIC65083/2022</b>        | EPI_ISL_13710153 |          | Microbiological Diagnostic Unit - Public Health Laboratory (MDU-PHL)                                | Microbiological Diagnostic Unit - Public Health Laboratory (MDU-PHL)                                                              | Seemann, T., Horan, K., Sherry, N.L.                                                                                                                                    |
| <b>hCoV-19/Australia/VIC63016/2022</b>        | EPI_ISL_13458344 |          | Microbiological Diagnostic Unit - Public Health Laboratory (MDU-PHL)                                | Microbiological Diagnostic Unit - Public Health Laboratory (MDU-PHL)                                                              | Seemann, T., Horan, K., Sherry, N.L.                                                                                                                                    |
| <b>hCoV-19/Australia/NSW-SAVID-12395/2022</b> | EPI_ISL_13199454 |          | Area of Virology, Serology and Virology Division (SAViD), New South Wales Health Pathology Randwick | Virology Research Laboratory; Area of Virology, Serology and Virology Division (SAViD), New South Wales Health Pathology Randwick | Foster, C.; Jean, T.; Wong, M.; Yeang, M.; Van Hal, S.; Rawlinson, W.                                                                                                   |
| <b>hCoV-19/Australia/NSW-ICPMR-28746/2022</b> | EPI_ISL_13721586 |          | Australian Clinical Labs (formerly Healthscope Pathology)                                           | NSW Health Pathology - Institute of Clinical Pathology and Medical Research; Westmead Hospital; University of Sydney              | Arnott A., Draper J., Gall M., Martinez E., Rockett R., Sintchenko V., on behalf of ICPMR                                                                               |
| <b>hCoV-19/Australia/NSW-ICPMR-28871/2022</b> | EPI_ISL_13198944 |          | 4Cyte Pathology                                                                                     | NSW Health Pathology - Institute of Clinical Pathology and Medical Research; Westmead Hospital; University of Sydney              | Arnott A., Draper J., Gall M., Martinez E., Rockett R., Sintchenko V., on behalf of ICPMR                                                                               |
| <b>hCoV-19/Australia/NSW-ICPMR-28741/2022</b> | EPI_ISL_13198814 |          | Laverty Pathology                                                                                   | NSW Health Pathology - Institute of Clinical Pathology and Medical Research; Westmead Hospital; University of Sydney              | Arnott A., Draper J., Gall M., Martinez E., Rockett R., Sintchenko V., on behalf of ICPMR                                                                               |
| <b>hCoV-19/Australia/NSW-ICPMR-25941/2022</b> | EPI_ISL_12932830 |          | Australian Clinical Labs (formerly Healthscope Pathology)                                           | NSW Health Pathology - Institute of Clinical Pathology and Medical Research; Westmead                                             | Arnott A., Draper J., Gall M., Martinez E., Rockett R., Sintchenko V., on behalf of ICPMR                                                                               |

|                          |                    |              |                                                                      | Hospital; University of Sydney                         |               |
|--------------------------|--------------------|--------------|----------------------------------------------------------------------|--------------------------------------------------------|---------------|
| <b>AUS/VIC9904/2020</b>  | ?                  | MW15639<br>4 | Microbiological Diagnostic Unit - Public Health Laboratory (MDU-PHL) | The Peter Doherty Institute for Infection and Immunity | Caly et al    |
| <b>AUS/VIC9581/2020</b>  | ?                  | MW15622<br>8 | Microbiological Diagnostic Unit - Public Health Laboratory (MDU-PHL) | The Peter Doherty Institute for Infection and Immunity | Caly et al    |
| <b>AUS/VIC8368/2020</b>  | ?                  | MW15369<br>4 | Microbiological Diagnostic Unit - Public Health Laboratory (MDU-PHL) | The Peter Doherty Institute for Infection and Immunity | Caly et al    |
| <b>AUS/VIC8060/2020</b>  | ?                  | MW15348<br>9 | Microbiological Diagnostic Unit - Public Health Laboratory (MDU-PHL) | The Peter Doherty Institute for Infection and Immunity | Caly et al    |
| <b>AUS/VIC7296/2020</b>  | ?                  | MW15493<br>7 | Victorian Infectious Diseases Reference Laboratory (VIDRL)           | The Peter Doherty Institute for Infection and Immunity | Caly et al    |
| <b>AUS/VIC4980/2020</b>  | EPI_ISL_51<br>9346 | MT970670     | Microbiological Diagnostic Unit - Public Health Laboratory (MDU-PHL) | The Peter Doherty Institute for Infection and Immunity | Sait et al    |
| <b>AUS/VIC3701/2020</b>  | EPI_ISL_52<br>0437 | MT970093     | Microbiological Diagnostic Unit - Public Health Laboratory (MDU-PHL) | The Peter Doherty Institute for Infection and Immunity | Sait et al    |
| <b>AUS/VIC17386/2020</b> | EPI_ISL_66<br>3869 | MW32089<br>7 | Microbiological Diagnostic Unit - Public Health Laboratory (MDU-PHL) | The Peter Doherty Institute for Infection and Immunity | Seemann et al |
| <b>AUS/VIC1614/2020</b>  | EPI_ISL_45<br>6523 | MT612213     | Victorian Infectious Diseases Reference Laboratory (VIDRL)           | The Peter Doherty Institute for Infection and Immunity | Caly et al    |
| <b>AUS/VIC14070/2020</b> | ?                  | MW15687<br>1 | Microbiological Diagnostic Unit - Public Health Laboratory (MDU-PHL) | The Peter Doherty Institute for Infection and Immunity | Caly et al    |
| <b>AUS/VIC11388/2020</b> | ?                  | MW15653<br>6 | Microbiological Diagnostic Unit - Public Health Laboratory (MDU-PHL) | The Peter Doherty Institute for Infection and Immunity | Caly et al    |

**S Table 2****Samples and cases collected for this study as analyzed by the Illumina COVIDSeq system on NovaSeq6000**

| Batch | Sampling time period                                    | Hospital source                | Sample number | Case number | Sequencing run                        |
|-------|---------------------------------------------------------|--------------------------------|---------------|-------------|---------------------------------------|
| 1st   | 2021 (May)                                              | WKH 12 CGMH 82                 | 94            | 93          | SP 2x51bp                             |
| 2nd   | 2021 (May-July)                                         | WKH 12* CGMH 82*<br>NTU-HCH 93 | 93#           | 93#         | S4 lane 2x151bp                       |
| 3rd   | 2021 (Dec)-2022 (Feb)+2020(Nov)-2021(April-Nov)11 cases | NTU-HCH 106                    | 106           | 66          | S4 lane 2x151bp                       |
| 4th   | 2022 (Feb 25-April 27)<br>April 27 (1 case)             | NTU-HCH 192                    | 192           | 191         | S4 lane 2x151bp<br>(280 sample/ lane) |
| 5th   | 5A_2022<br>(April 26-May 3)                             | NTU-HCH 384                    | 384           | 384         | S4 lane 2x151bp                       |
|       | 5B_2022<br>(May 3-May 23)                               | NTU-HCH 384                    | 384           | 384         | S4 lane 2x151bp                       |
|       | 5C_2022<br>(May 17-June 6)                              | NTU-HCH 384                    | 384           | 384         | S4 lane 2x151bp                       |
|       | 5D_2022<br>(May 4-June 6)                               | NTU-HCH 384                    | 384           | 384         | S4 lane 2x151bp                       |
|       | 5E_2022<br>(May 18-June 6)<br>+ July 6 (1 case)         | NTU-HCH 384                    | 384           | 384         | S4 lane 2x151bp                       |

\*Repeat from the first batch

#New samples from NTU-HCH



**S Table 3**  
**Sequences selected for GISAID submission and phylogenetics analysis**

| Batch | Run      | Coverage |       |       |       |       |     | Total |
|-------|----------|----------|-------|-------|-------|-------|-----|-------|
|       |          | >=98     | 90-97 | 80-89 | 70-79 | 60-69 | <60 |       |
| 1     | 1        | 77       | 12    | 0     | 4     | 0     | 1   | 94    |
| 2     | 2        | 63       | 0     | 5     | 3     | 4     | 18  | 93    |
| 3     | 3        | 43       | 14    | 4     | 2     | 5     | 38  | 100   |
| 4     | 4        | 140      | 17    | 2     | 3     | 0     | 30  | 192   |
| 5     | 5A       | 360      | 15    | 5     | 2     | 0     | 2   | 384   |
|       | 5B       | 331      | 30    | 11    | 6     | 1     | 5   | 384   |
|       | 5C       | 304      | 47    | 15    | 14    | 4     | 0   | 384   |
|       | 5D       | 366      | 16    | 2     | 0     | 0     | 0   | 384   |
|       | 5E       | 359      | 24    | 0     | 1     | 0     | 0   | 384   |
|       | NTU-HCH* | 1966     | 163   | 44    | 31    | 14    | 93  | 2311  |
|       | Total#   | 2043     | 175   | 44    | 35    | 14    | 94  | 2405  |

\* Count of NTU-HCH cases, from Batch (Run-2) through Batch 5 (Runs 5A-5E)

# Total count of all three hospitals

**S Table 4**  
**Mutations in the BA.2.3.7 sublineages**

|              | Accumulated mutations* |                  |                  | Selected mutations† |
|--------------|------------------------|------------------|------------------|---------------------|
|              | BA.2                   | BA.2.3           | BA.2.3.7         |                     |
| <b>ORF1a</b> | S135R                  | S135R            | S135R            | A591V<br>L631F      |
|              | T842I                  | T842I            | L631F<br>T842I   | I1091T              |
|              | G1307S                 | G1307S           | G1307S           |                     |
|              | L3027F                 | A2909V<br>L3027F | A2909V<br>L3027F |                     |
|              | T3090I                 | T3090I           | T3090I           |                     |
|              | L3201F                 | L3201F           | L3201F           | T3224A              |
|              | T3255I                 | T3255I           | T3255I           |                     |
|              | P3395H                 | P3395H           | P3395H           |                     |
|              | del3675                | del3675          | del3675          |                     |
|              | del3676                | del3676          | del3676          |                     |
|              | del3677                | del3677          | del3677          | V3683I              |
| <b>S</b>     | T19I                   | T19I             | T19I             |                     |
|              | L24S                   | L24S             | L24S             |                     |
|              | del25                  | del25            | del25            |                     |
|              | del26                  | del26            | del26            |                     |
|              | del27                  | del27            | del27            |                     |
|              |                        |                  | K97E             | K97E                |
|              | G142D                  | G142D            | G142D            |                     |
|              | V213G                  | V213G            | V213G            |                     |
|              | G339D                  | G339D            | G339D            |                     |
|              | S371F                  | S371F            | S371F            |                     |
|              | S373P                  | S373P            | S373P            |                     |
|              | S375F                  | S375F            | S375F            |                     |
|              | T376A                  | T376A            | T376A            |                     |
|              | D405N                  | D405N            | D405N            |                     |
|              | R408S                  | R408S            | R408S            |                     |
|              | K417N                  | K417N            | K417N            |                     |
|              | N440K                  | N440K            | N440K            |                     |
|              | S477N                  | S477N            | S477N            |                     |
|              | T478K                  | T478K            | T478K            |                     |
|              | E484A                  | E484A            | E484A            |                     |
|              | Q493R                  | Q493R            | Q493R            |                     |
|              | Q498R                  | Q498R            | Q498R            |                     |
|              | N501Y                  | N501Y            | N501Y            |                     |
| Y505H        | Y505H                  | Y505H            |                  |                     |
| D614G        | D614G                  | D614G            |                  |                     |
| H655Y        | H655Y                  | H655Y            |                  |                     |
| N679K        | N679K                  | N679K            |                  |                     |
| P681H        | P681H                  | P681H            |                  |                     |
| N764K        | N764K                  | N764K            |                  |                     |
| D796Y        | D796Y                  | D796Y            |                  |                     |
| Q954H        | Q954H                  | Q954H            |                  |                     |
| N969K        | N969K                  | N969K            | G1251V           |                     |
| <b>3a</b>    |                        | L140F            | L140F            |                     |
|              | T223I                  | T223I            | T223I            |                     |
| <b>N</b>     | P13L                   | P13L             | P13L             |                     |
|              | del31                  | del31            | del31            |                     |
|              | del32                  | del32            | del32            |                     |
|              | del33                  | del33            | del33            |                     |
|              | R203K                  | R203K            | R203K            |                     |
|              | G204R                  | G204R            | G204R            |                     |
|              |                        | M322I            | M322I            |                     |
|              | S413R                  | S413R            | S413R            |                     |

\* Using SARS-CoV-2 Wuhan-Hu-1 (MN90847.3) as the reference sequence. Mutations in ORF1b, E, M, 6 and 8 are not shown as they are identical between BA.2, BA.2.3 and BA.2.3.7

† Mutations detected in the Omicron lineages are characterized by the current study

**S Table 5**  
**Submitted sequences of SARS-CoV-2 BA2.3.7 from different countries**

| Country      | Count      |
|--------------|------------|
| Taiwan*      | 51         |
| Japan        | 44         |
| USA          | 37         |
| Indonesia    | 27         |
| Hong Kong    | 22         |
| Australia    | 7          |
| Denmark      | 6          |
| Canada       | 5          |
| Singapore    | 4          |
| South Korea  | 4          |
| Philippines  | 3          |
| Thailand     | 3          |
| France       | 3          |
| Cambodia     | 2          |
| Austria      | 2          |
| Sweden       | 2          |
| Germany      | 2          |
| Spain        | 1          |
| Vietnam      | 1          |
| Slovenia     | 1          |
| New Zealand  | 1          |
| <b>Total</b> | <b>228</b> |

\* The case number does not include the contribution from this study.
